# Supplementary material
Source: MDPI journal article supplement (https://www.mdpi.com/2077-0472/12/5/726)
Supplement: s1 [file s1 › agriculture-1712066-supplementary.pdf]

## Agroforestry in the 2017 Census of Agriculture

### State Summaries

|                             |                           |                               |                                |                               |
|-----------------------------|---------------------------|-------------------------------|--------------------------------|-------------------------------|
| <a href="#">Alabama</a>     | <a href="#">Hawaii</a>    | <a href="#">Massachusetts</a> | <a href="#">New Mexico</a>     | <a href="#">South Dakota</a>  |
| <a href="#">Alaska</a>      | <a href="#">Idaho</a>     | <a href="#">Michigan</a>      | <a href="#">New York</a>       | <a href="#">Tennessee</a>     |
| <a href="#">Arizona</a>     | <a href="#">Illinois</a>  | <a href="#">Minnesota</a>     | <a href="#">North Carolina</a> | <a href="#">Texas</a>         |
| <a href="#">Arkansas</a>    | <a href="#">Indiana</a>   | <a href="#">Mississippi</a>   | <a href="#">North Dakota</a>   | <a href="#">Utah</a>          |
| <a href="#">California</a>  | <a href="#">Iowa</a>      | <a href="#">Missouri</a>      | <a href="#">Ohio</a>           | <a href="#">Vermont</a>       |
| <a href="#">Colorado</a>    | <a href="#">Kansas</a>    | <a href="#">Montana</a>       | <a href="#">Oklahoma</a>       | <a href="#">Virginia</a>      |
| <a href="#">Connecticut</a> | <a href="#">Kentucky</a>  | <a href="#">Nebraska</a>      | <a href="#">Oregon</a>         | <a href="#">Washington</a>    |
| <a href="#">Delaware</a>    | <a href="#">Louisiana</a> | <a href="#">Nevada</a>        | <a href="#">Pennsylvania</a>   | <a href="#">West Virginia</a> |
| <a href="#">Florida</a>     | <a href="#">Maine</a>     | <a href="#">New Hampshire</a> | <a href="#">Rhode Island</a>   | <a href="#">Wisconsin</a>     |
| <a href="#">Georgia</a>     | <a href="#">Maryland</a>  | <a href="#">New Jersey</a>    | <a href="#">South Carolina</a> | <a href="#">Wyoming</a>       |

# Agroforestry in Alabama based on the 2017 Census of Agriculture

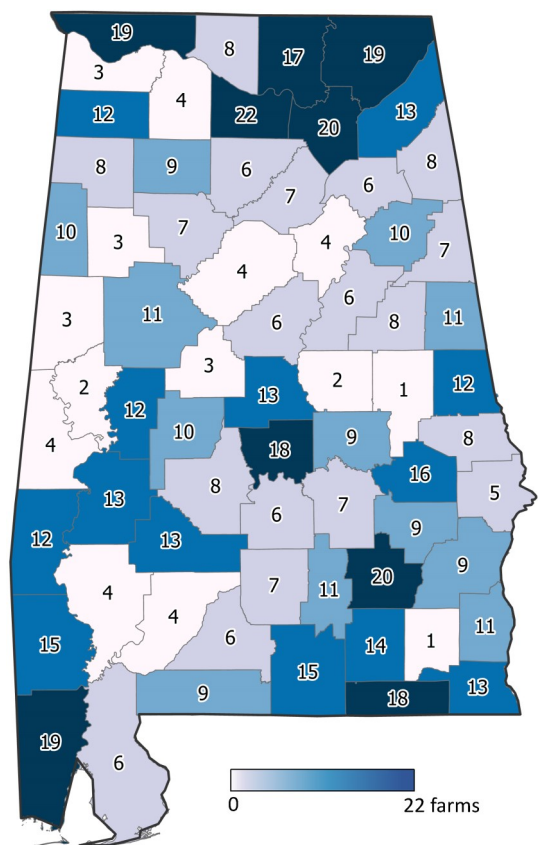

Number of Alabama Farms Reporting an Agroforestry Practice in 2017

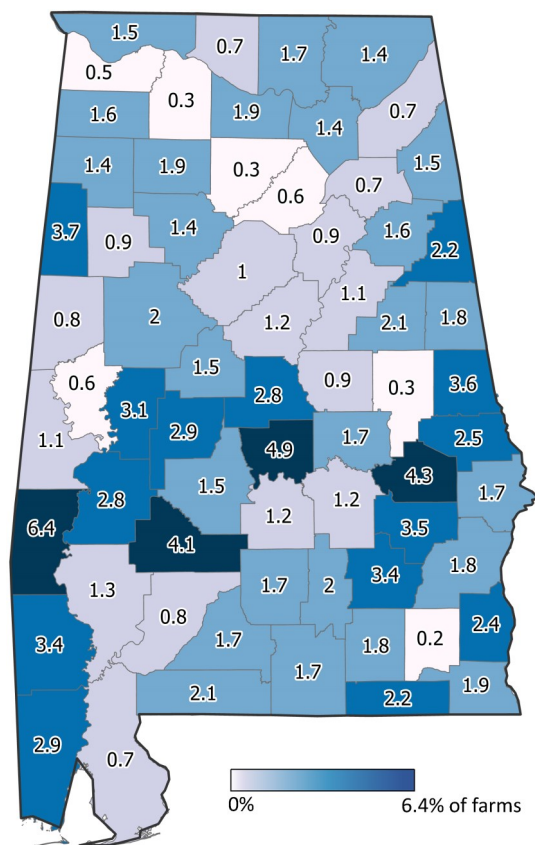

Percentage of Alabama Farms Reporting an Agroforestry Practice in 2017

| County   | Number of Farms with an Agroforestry Practice | Total Number of Farms | Percent of Farms with an Agroforestry Practice |
|----------|-----------------------------------------------|-----------------------|------------------------------------------------|
| Autauga  | 18                                            | 371                   | 4.9%                                           |
| Baldwin  | 6                                             | 842                   | 0.7%                                           |
| Barbour  | 9                                             | 498                   | 1.8%                                           |
| Bibb     | 3                                             | 205                   | 1.5%                                           |
| Blount   | 7                                             | 1,146                 | 0.6%                                           |
| Bullock  | 9                                             | 255                   | 3.5%                                           |
| Butler   | 7                                             | 420                   | 1.7%                                           |
| Calhoun  | 10                                            | 643                   | 1.6%                                           |
| Chambers | 12                                            | 331                   | 3.6%                                           |
| Cherokee | 8                                             | 530                   | 1.5%                                           |
| Chilton  | 13                                            | 463                   | 2.8%                                           |
| Choctaw  | 12                                            | 188                   | 6.4%                                           |
| Clarke   | 4                                             | 320                   | 1.3%                                           |
| Clay     | 8                                             | 381                   | 2.1%                                           |
| Cleburne | 7                                             | 319                   | 2.2%                                           |
| Coffee   | 14                                            | 788                   | 1.8%                                           |

| County    | Number of Farms with an Agroforestry Practice | Total Number of Farms | Percent of Farms with an Agroforestry Practice |
|-----------|-----------------------------------------------|-----------------------|------------------------------------------------|
| Colbert   | 3                                             | 591                   | 0.5%                                           |
| Conecuh   | 6                                             | 344                   | 1.7%                                           |
| Coosa     | 2                                             | 215                   | 0.9%                                           |
| Covington | 15                                            | 907                   | 1.7%                                           |
| Crenshaw  | 11                                            | 543                   | 2.0%                                           |
| Cullman   | 6                                             | 1,781                 | 0.3%                                           |
| Dale      | 1                                             | 469                   | 0.2%                                           |
| Dallas    | 8                                             | 528                   | 1.5%                                           |
| DeKalb    | 13                                            | 1,939                 | 0.7%                                           |
| Elmore    | 9                                             | 538                   | 1.7%                                           |
| Escambia  | 9                                             | 437                   | 2.1%                                           |
| Etowah    | 6                                             | 817                   | 0.7%                                           |
| Fayette   | 3                                             | 324                   | 0.9%                                           |
| Franklin  | 12                                            | 729                   | 1.6%                                           |
| Geneva    | 18                                            | 820                   | 2.2%                                           |
| Greene    | 2                                             | 325                   | 0.6%                                           |

## Agroforestry in Alabama based on the 2017 Census of Agriculture

| County     | Number of Farms with an Agroforestry Practice | Total Number of Farms | Percent of Farms with an Agroforestry Practice |
|------------|-----------------------------------------------|-----------------------|------------------------------------------------|
| Hale       | 12                                            | 393                   | 3.1%                                           |
| Henry      | 11                                            | 455                   | 2.4%                                           |
| Houston    | 13                                            | 698                   | 1.9%                                           |
| Jackson    | 19                                            | 1,355                 | 1.4%                                           |
| Jefferson  | 4                                             | 387                   | 1.0%                                           |
| Lamar      | 10                                            | 269                   | 3.7%                                           |
| Lauderdale | 19                                            | 1,309                 | 1.5%                                           |
| Lawrence   | 4                                             | 1,252                 | 0.3%                                           |
| Lee        | 8                                             | 314                   | 2.5%                                           |
| Limestone  | 8                                             | 1,156                 | 0.7%                                           |
| Lowndes    | 6                                             | 512                   | 1.2%                                           |
| Macon      | 16                                            | 373                   | 4.3%                                           |
| Madison    | 17                                            | 1,021                 | 1.7%                                           |
| Marengo    | 13                                            | 471                   | 2.8%                                           |
| Marion     | 8                                             | 582                   | 1.4%                                           |
| Marshall   | 20                                            | 1,444                 | 1.4%                                           |
| Mobile     | 19                                            | 653                   | 2.9%                                           |
| Monroe     | 4                                             | 477                   | 0.8%                                           |

| County     | Number of Farms with an Agroforestry Practice | Total Number of Farms | Percent of Farms with an Agroforestry Practice |
|------------|-----------------------------------------------|-----------------------|------------------------------------------------|
| Montgomery | 7                                             | 575                   | 1.2%                                           |
| Morgan     | 22                                            | 1,164                 | 1.9%                                           |
| Perry      | 10                                            | 349                   | 2.9%                                           |
| Pickens    | 3                                             | 377                   | 0.8%                                           |
| Pike       | 20                                            | 594                   | 3.4%                                           |
| Randolph   | 11                                            | 597                   | 1.8%                                           |
| Russell    | 5                                             | 296                   | 1.7%                                           |
| St. Clair  | 4                                             | 490                   | 0.8%                                           |
| Shelby     | 6                                             | 447                   | 1.2%                                           |
| Sumter     | 4                                             | 367                   | 1.1%                                           |
| Talladega  | 6                                             | 566                   | 1.1%                                           |
| Tallapoosa | 1                                             | 347                   | 0.3%                                           |
| Tuscaloosa | 11                                            | 557                   | 2.0%                                           |
| Walker     | 7                                             | 501                   | 1.4%                                           |
| Washington | 15                                            | 435                   | 3.4%                                           |
| Wilcox     | 13                                            | 318                   | 4.1%                                           |
| Winston    | 9                                             | 484                   | 1.9%                                           |

Total number of Alabama farms with an agroforestry practice: 635    Total number of Alabama farms: 40,592

Percentage of Alabama farms with an agroforestry practice: 1.6%

Data Source: USDA NASS Census of Agriculture 2017

Maps and table created by USDA National Agroforestry Center

## Agroforestry in Alaska based on the 2017 Census of Agriculture

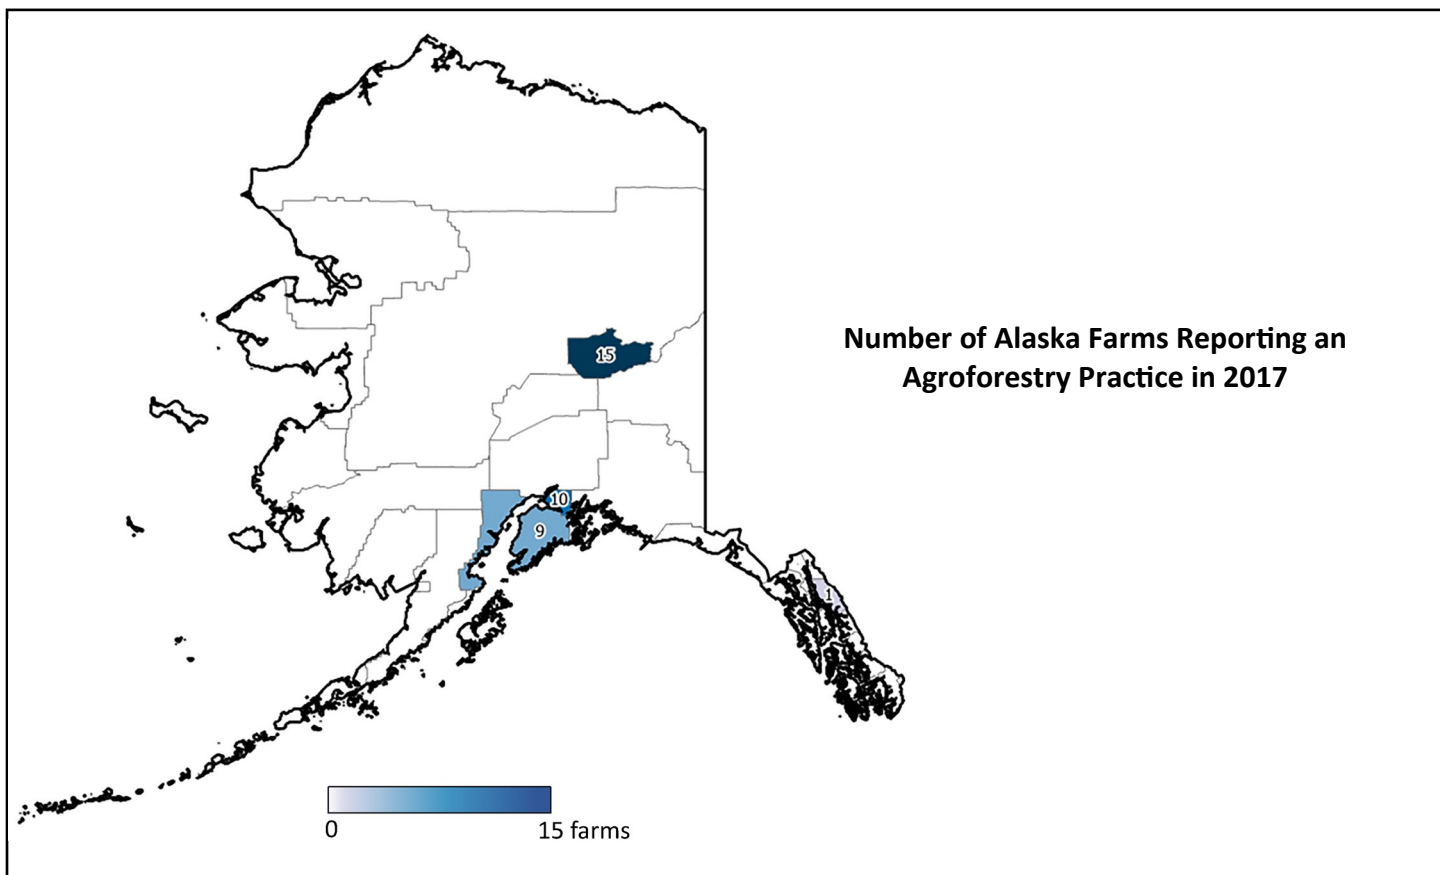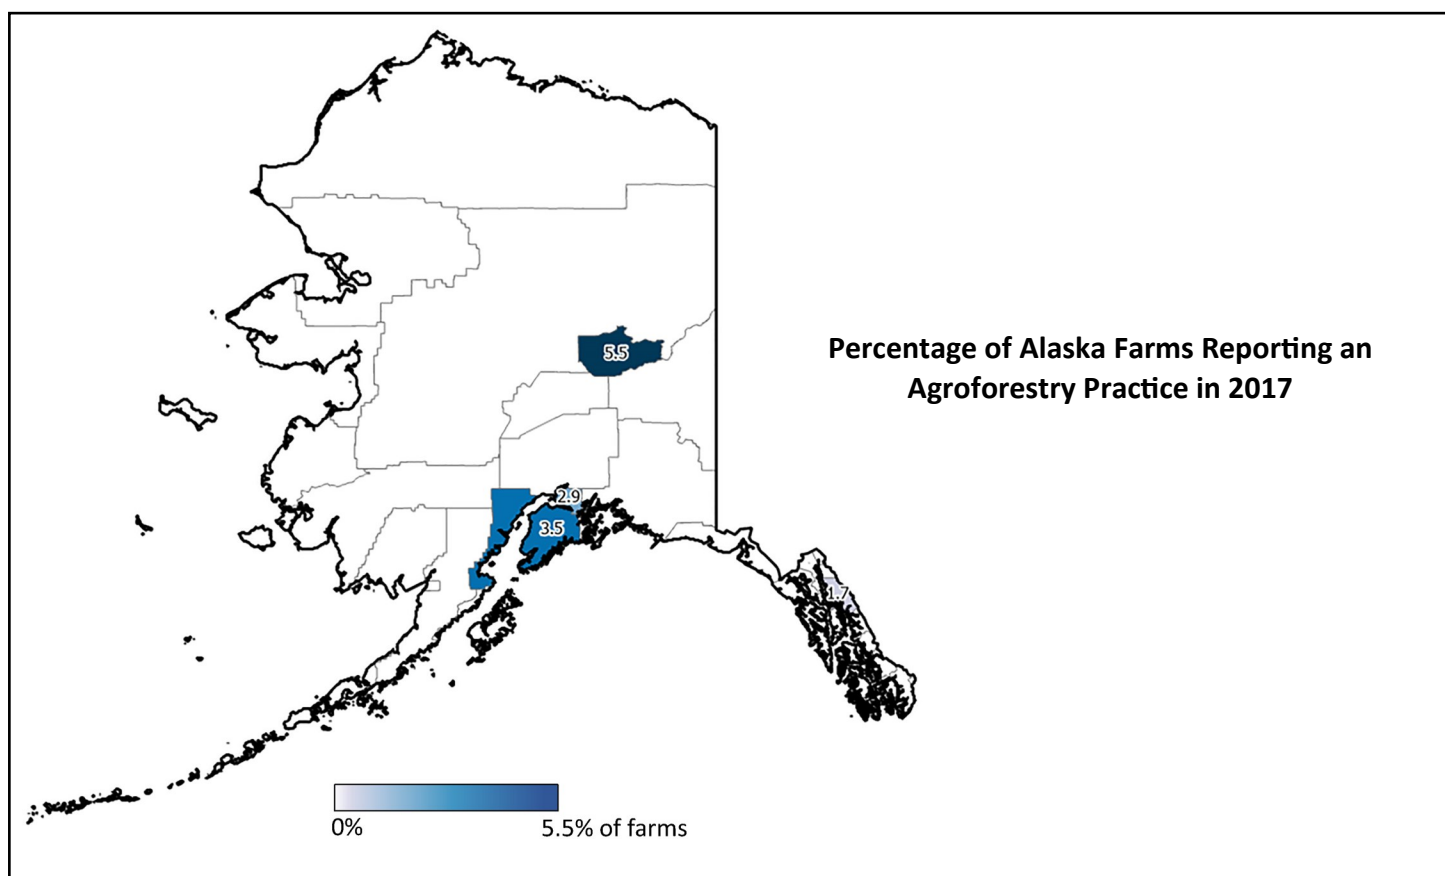

## Agroforestry in Alaska based on the 2017 Census of Agriculture

| County*                         | Number of<br>Farms with an<br>Agroforestry<br>Practice | Total<br>Number<br>of Farms | Percent of<br>Farms with an<br>Agroforestry<br>Practice |
|---------------------------------|--------------------------------------------------------|-----------------------------|---------------------------------------------------------|
| Anchorage Borough               | 10                                                     | 350                         | 2.9%                                                    |
| Fairbanks North Star<br>Borough | 15                                                     | 274                         | 5.5%                                                    |

| County*                    | Number of<br>Farms with an<br>Agroforestry<br>Practice | Total<br>Number<br>of Farms | Percent of<br>Farms with an<br>Agroforestry<br>Practice |
|----------------------------|--------------------------------------------------------|-----------------------------|---------------------------------------------------------|
| Juneau                     | 1                                                      | 60                          | 1.7%                                                    |
| Kenai Peninsula<br>Borough | 9                                                      | 260                         | 3.5%                                                    |

\*Counties not listed in the table have no farms reporting an agroforestry practice in 2017.

Total number of Alaska farms with an agroforestry practice: 35    Total number of Alaska farms: 990

Percentage of Alaska farms with agroforestry practice: 3.5%

Data Source: USDA NASS Census of Agriculture 2017

Maps and table created by USDA National Agroforestry Center

# Agroforestry in Arizona based on the 2017 Census of Agriculture

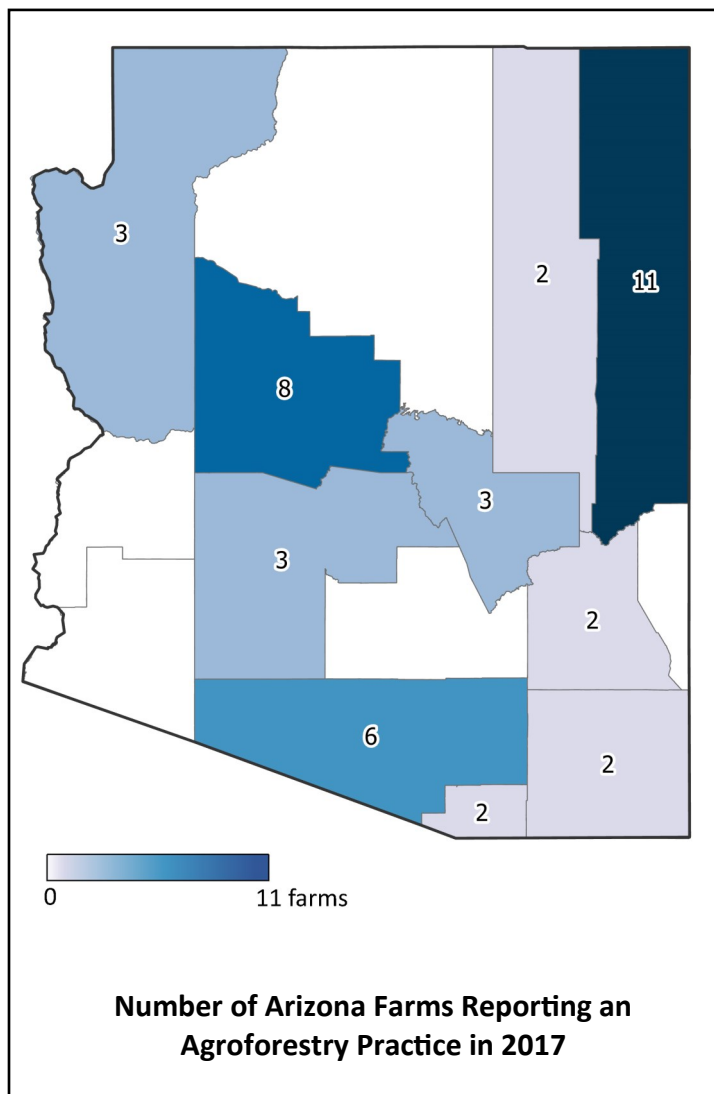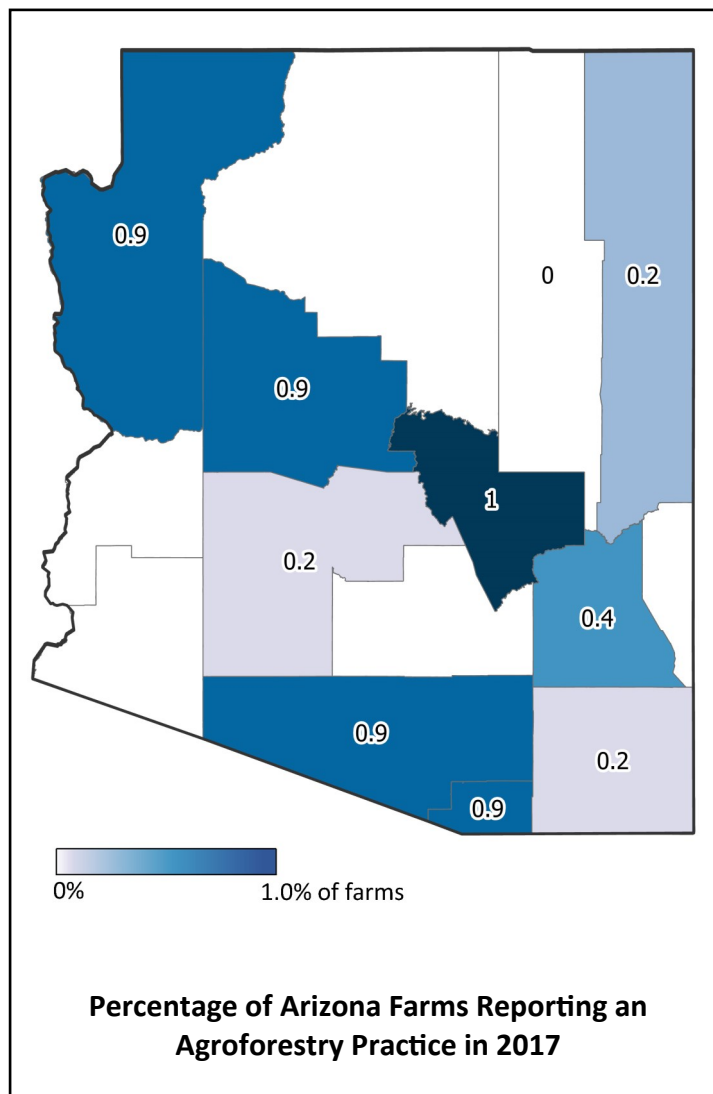

| County*  | Number of Farms with an Agroforestry Practice | Total Number of Farms | Percent of Farms with an Agroforestry Practice |
|----------|-----------------------------------------------|-----------------------|------------------------------------------------|
| Apache   | 11                                            | 5,551                 | 0.2%                                           |
| Cochise  | 2                                             | 1,083                 | 0.2%                                           |
| Gila     | 3                                             | 298                   | 1.0%                                           |
| Graham   | 2                                             | 448                   | 0.4%                                           |
| Maricopa | 3                                             | 1,874                 | 0.2%                                           |

| County*    | Number of Farms with an Agroforestry Practice | Total Number of Farms | Percent of Farms with an Agroforestry Practice |
|------------|-----------------------------------------------|-----------------------|------------------------------------------------|
| Mohave     | 3                                             | 317                   | 0.9%                                           |
| Navajo     | 2                                             | 4,205                 | 0.1%                                           |
| Pima       | 6                                             | 661                   | 0.9%                                           |
| Santa Cruz | 2                                             | 219                   | 0.9%                                           |
| Yavapai    | 8                                             | 850                   | 0.9%                                           |

\*Counties not listed in the table have no farms reporting an agroforestry practice in 2017.

Total number of Arizona farms with an agroforestry practice: 42 Total number of Arizona farms: 19,086

Percentage of Arizona farms with an agroforestry practice: 0.2%

Data Source: USDA NASS Census of Agriculture 2017

Maps and table created by USDA National Agroforestry Center

# Agroforestry in Arkansas based on the 2017 Census of Agriculture

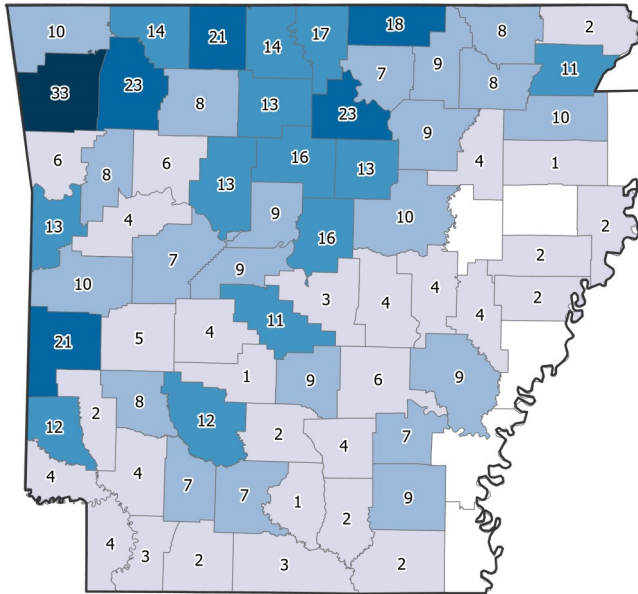

0 33 farms

**Number of Arkansas Farms Reporting an Agroforestry Practice in 2017**

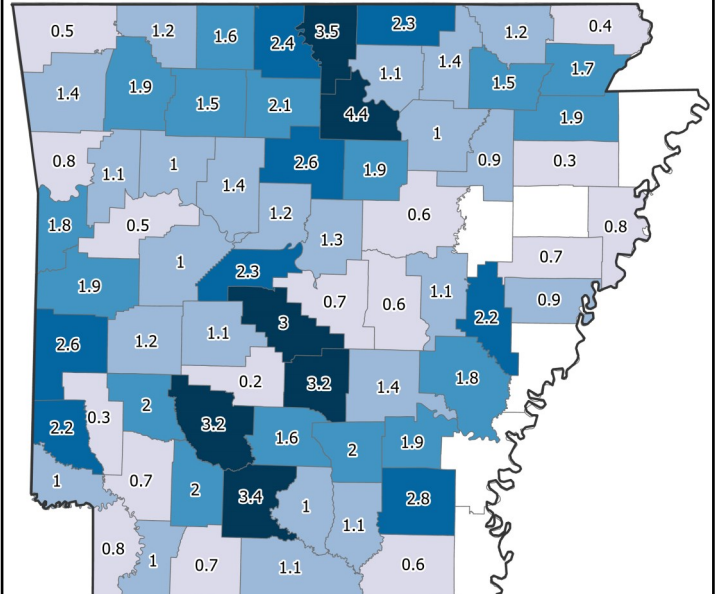

0% 4.4% of farms

**Percentage of Arkansas Farms Reporting an Agroforestry Practice in 2017**

| County*    | Number of Farms with an Agroforestry Practice | Total Number of Farms | Percent of Farms with an Agroforestry Practice |
|------------|-----------------------------------------------|-----------------------|------------------------------------------------|
| Arkansas   | 9                                             | 488                   | 1.8%                                           |
| Ashley     | 2                                             | 353                   | 0.6%                                           |
| Baxter     | 17                                            | 479                   | 3.5%                                           |
| Benton     | 10                                            | 1,936                 | 0.5%                                           |
| Boone      | 21                                            | 1,313                 | 1.6%                                           |
| Bradley    | 2                                             | 181                   | 1.1%                                           |
| Calhoun    | 1                                             | 101                   | 1.0%                                           |
| Carroll    | 14                                            | 1,169                 | 1.2%                                           |
| Clark      | 12                                            | 377                   | 3.2%                                           |
| Clay       | 2                                             | 542                   | 0.4%                                           |
| Cleburne   | 13                                            | 676                   | 1.9%                                           |
| Cleveland  | 4                                             | 205                   | 2.0%                                           |
| Columbia   | 2                                             | 297                   | 0.7%                                           |
| Conway     | 9                                             | 768                   | 1.2%                                           |
| Craighead  | 10                                            | 523                   | 1.9%                                           |
| Crawford   | 6                                             | 799                   | 0.8%                                           |
| Crittenden | 2                                             | 262                   | 0.8%                                           |
| Dallas     | 2                                             | 126                   | 1.6%                                           |
| Drew       | 9                                             | 318                   | 2.8%                                           |
| Faulkner   | 16                                            | 1,191                 | 1.3%                                           |

| County*      | Number of Farms with an Agroforestry Practice | Total Number of Farms | Percent of Farms with an Agroforestry Practice |
|--------------|-----------------------------------------------|-----------------------|------------------------------------------------|
| Franklin     | 8                                             | 752                   | 1.1%                                           |
| Fulton       | 18                                            | 795                   | 2.3%                                           |
| Garland      | 4                                             | 357                   | 1.1%                                           |
| Grant        | 9                                             | 281                   | 3.2%                                           |
| Greene       | 11                                            | 631                   | 1.7%                                           |
| Hempstead    | 4                                             | 613                   | 0.7%                                           |
| Hot Spring   | 1                                             | 563                   | 0.2%                                           |
| Howard       | 2                                             | 586                   | 0.3%                                           |
| Independence | 9                                             | 890                   | 1.0%                                           |
| Izard        | 7                                             | 632                   | 1.1%                                           |
| Jackson      | 4                                             | 424                   | 0.9%                                           |
| Jefferson    | 6                                             | 436                   | 1.4%                                           |
| Johnson      | 6                                             | 577                   | 1.0%                                           |
| Lafayette    | 3                                             | 287                   | 1.0%                                           |
| Lawrence     | 8                                             | 535                   | 1.5%                                           |
| Lee          | 2                                             | 221                   | 0.9%                                           |
| Lincoln      | 7                                             | 369                   | 1.9%                                           |
| Little River | 4                                             | 414                   | 1.0%                                           |
| Logan        | 4                                             | 873                   | 0.5%                                           |
| Lonoke       | 4                                             | 702                   | 0.6%                                           |

## Agroforestry in Arkansas based on the 2017 Census of Agriculture

| County*    | Number of Farms with an Agroforestry Practice | Total Number of Farms | Percent of Farms with an Agroforestry Practice |
|------------|-----------------------------------------------|-----------------------|------------------------------------------------|
| Madison    | 23                                            | 1,229                 | 1.9%                                           |
| Marion     | 14                                            | 587                   | 2.4%                                           |
| Miller     | 4                                             | 513                   | 0.8%                                           |
| Monroe     | 4                                             | 186                   | 2.2%                                           |
| Montgomery | 5                                             | 428                   | 1.2%                                           |
| Nevada     | 7                                             | 355                   | 2.0%                                           |
| Newton     | 8                                             | 537                   | 1.5%                                           |
| Ouachita   | 7                                             | 205                   | 3.4%                                           |
| Perry      | 9                                             | 397                   | 2.3%                                           |
| Pike       | 8                                             | 394                   | 2.0%                                           |
| Poinsett   | 1                                             | 363                   | 0.3%                                           |
| Polk       | 21                                            | 793                   | 2.6%                                           |
| Pope       | 13                                            | 919                   | 1.4%                                           |
| Prairie    | 4                                             | 350                   | 1.1%                                           |
| Pulaski    | 3                                             | 411                   | 0.7%                                           |

| County*     | Number of Farms with an Agroforestry Practice | Total Number of Farms | Percent of Farms with an Agroforestry Practice |
|-------------|-----------------------------------------------|-----------------------|------------------------------------------------|
| Randolph    | 8                                             | 657                   | 1.2%                                           |
| Saline      | 11                                            | 371                   | 3.0%                                           |
| Scott       | 10                                            | 528                   | 1.9%                                           |
| Searcy      | 13                                            | 631                   | 2.1%                                           |
| Sebastian   | 13                                            | 706                   | 1.8%                                           |
| Sevier      | 12                                            | 540                   | 2.2%                                           |
| Sharp       | 9                                             | 622                   | 1.4%                                           |
| St. Francis | 2                                             | 278                   | 0.7%                                           |
| Stone       | 23                                            | 526                   | 4.4%                                           |
| Union       | 3                                             | 268                   | 1.1%                                           |
| Van Buren   | 16                                            | 611                   | 2.6%                                           |
| Washington  | 33                                            | 2,279                 | 1.4%                                           |
| White       | 10                                            | 1,613                 | 0.6%                                           |
| Yell        | 7                                             | 718                   | 1.0%                                           |

\*Counties not listed in the table have no farms reporting an agroforestry practice in 2017.

Total number of Arkansas farms with an agroforestry practice: 585    Total number of Arkansas farms: 42,625

Percentage of Arkansas farms with an agroforestry practice: 1.4%

Data Source: USDA NASS Census of Agriculture 2017

Maps and table created by USDA National Agroforestry Center

# Agroforestry in California based on the 2017 Census of Agriculture

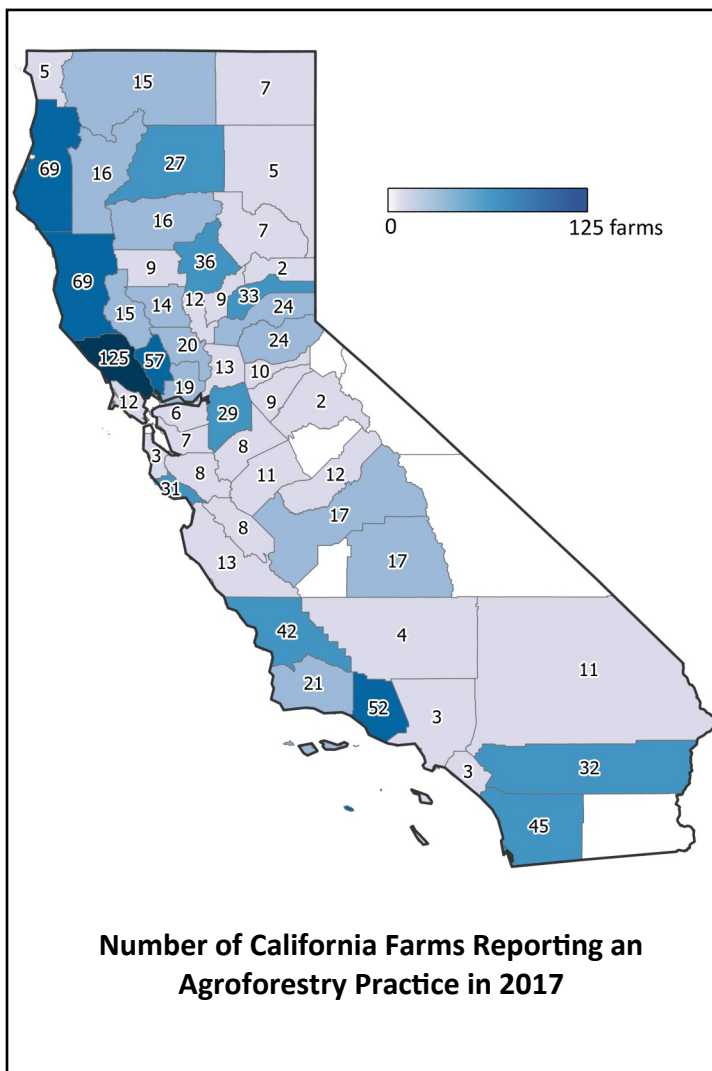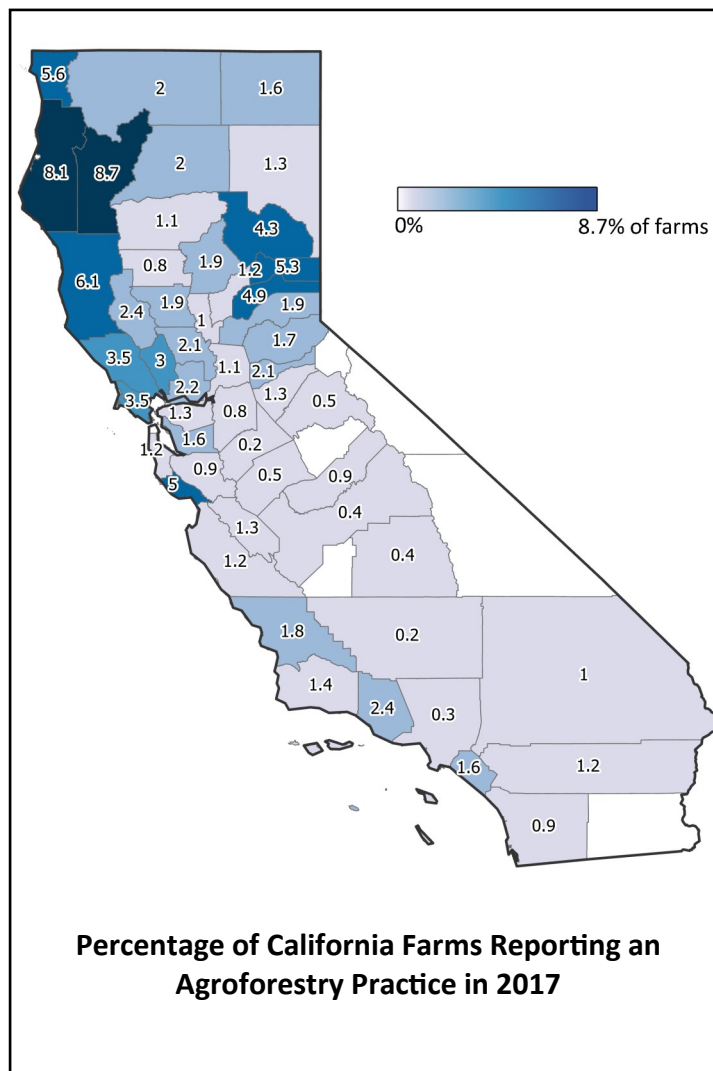

| County*      | Number of Farms with an Agroforestry Practice | Total Number of Farms | Percent of Farms with an Agroforestry Practice |
|--------------|-----------------------------------------------|-----------------------|------------------------------------------------|
| Alameda      | 7                                             | 446                   | 1.6%                                           |
| Amador       | 10                                            | 482                   | 2.1%                                           |
| Butte        | 36                                            | 1912                  | 1.9%                                           |
| Calaveras    | 9                                             | 699                   | 1.3%                                           |
| Colusa       | 14                                            | 751                   | 1.9%                                           |
| Contra Costa | 6                                             | 459                   | 1.3%                                           |
| Del Norte    | 5                                             | 90                    | 5.6%                                           |
| El Dorado    | 24                                            | 1,390                 | 1.7%                                           |
| Fresno       | 17                                            | 4,774                 | 0.4%                                           |
| Glenn        | 9                                             | 1,173                 | 0.8%                                           |
| Humboldt     | 69                                            | 849                   | 8.1%                                           |
| Kern         | 4                                             | 1,731                 | 0.2%                                           |
| Lake         | 15                                            | 636                   | 2.4%                                           |
| Lassen       | 5                                             | 377                   | 1.3%                                           |
| Los Angeles  | 3                                             | 1,035                 | 0.3%                                           |

| County*        | Number of Farms with an Agroforestry Practice | Total Number of Farms | Percent of Farms with an Agroforestry Practice |
|----------------|-----------------------------------------------|-----------------------|------------------------------------------------|
| Madera         | 12                                            | 1,386                 | 0.9%                                           |
| Marin          | 12                                            | 343                   | 3.5%                                           |
| Mendocino      | 69                                            | 1,128                 | 6.1%                                           |
| Merced         | 11                                            | 2,337                 | 0.5%                                           |
| Modoc          | 7                                             | 423                   | 1.6%                                           |
| Monterey       | 13                                            | 1,104                 | 1.2%                                           |
| Napa           | 57                                            | 1,866                 | 3.1%                                           |
| Nevada         | 33                                            | 673                   | 4.9%                                           |
| Orange         | 3                                             | 193                   | 1.6%                                           |
| Placer         | 24                                            | 1,237                 | 1.9%                                           |
| Plumas         | 7                                             | 162                   | 4.3%                                           |
| Riverside      | 32                                            | 2,667                 | 1.2%                                           |
| Sacramento     | 13                                            | 1,161                 | 1.1%                                           |
| San Benito     | 8                                             | 610                   | 1.3%                                           |
| San Bernardino | 11                                            | 1,062                 | 1.0%                                           |

## Agroforestry in California based on the 2017 Census of Agriculture

| County*         | Number of Farms with an Agroforestry Practice | Total Number of Farms | Percent of Farms with an Agroforestry Practice |
|-----------------|-----------------------------------------------|-----------------------|------------------------------------------------|
| San Diego       | 45                                            | 5,082                 | 0.9%                                           |
| San Joaquin     | 29                                            | 3,430                 | 0.8%                                           |
| San Luis Obispo | 42                                            | 2,349                 | 1.8%                                           |
| San Mateo       | 3                                             | 241                   | 1.2%                                           |
| Santa Barbara   | 21                                            | 1,467                 | 1.4%                                           |
| Santa Clara     | 8                                             | 890                   | 0.9%                                           |
| Santa Cruz      | 31                                            | 625                   | 5.0%                                           |
| Shasta          | 27                                            | 1,337                 | 2.0%                                           |
| Sierra          | 2                                             | 38                    | 5.3%                                           |
| Siskiyou        | 15                                            | 745                   | 2.0%                                           |
| Solano          | 19                                            | 849                   | 2.2%                                           |

| County*    | Number of Farms with an Agroforestry Practice | Total Number of Farms | Percent of Farms with an Agroforestry Practice |
|------------|-----------------------------------------------|-----------------------|------------------------------------------------|
| Sonoma     | 125                                           | 3,594                 | 3.5%                                           |
| Stanislaus | 8                                             | 3,621                 | 0.2%                                           |
| Sutter     | 12                                            | 1,157                 | 1.0%                                           |
| Tehama     | 16                                            | 1,479                 | 1.1%                                           |
| Trinity    | 16                                            | 185                   | 8.7%                                           |
| Tulare     | 17                                            | 4,187                 | 0.4%                                           |
| Tuolumne   | 2                                             | 417                   | 0.5%                                           |
| Ventura    | 52                                            | 2,135                 | 2.4%                                           |
| Yolo       | 20                                            | 949                   | 2.1%                                           |
| Yuba       | 9                                             | 764                   | 1.2%                                           |

\*Counties not listed in the table have no farms reporting an agroforestry practice in 2017.

Total number of California farms with an agroforestry practice: 1,064 Total number of California farms: 70,521

Percentage of California farms with an agroforestry practice: 1.5%

Data Source: USDA NASS Census of Agriculture 2017

Maps and table created by USDA National Agroforestry Center

# Agroforestry in Colorado based on the 2017 Census of Agriculture

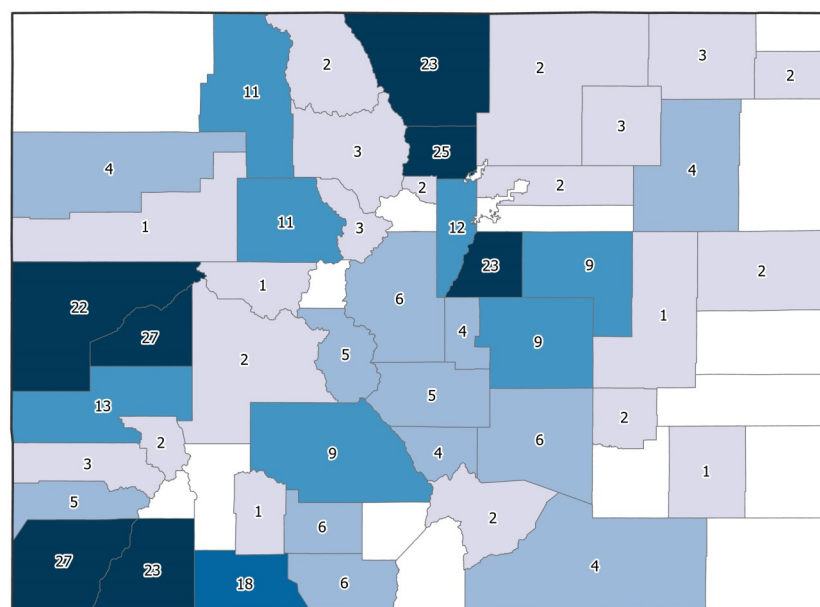

Number of Colorado Farms Reporting an Agroforestry Practice in 2017

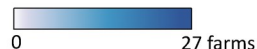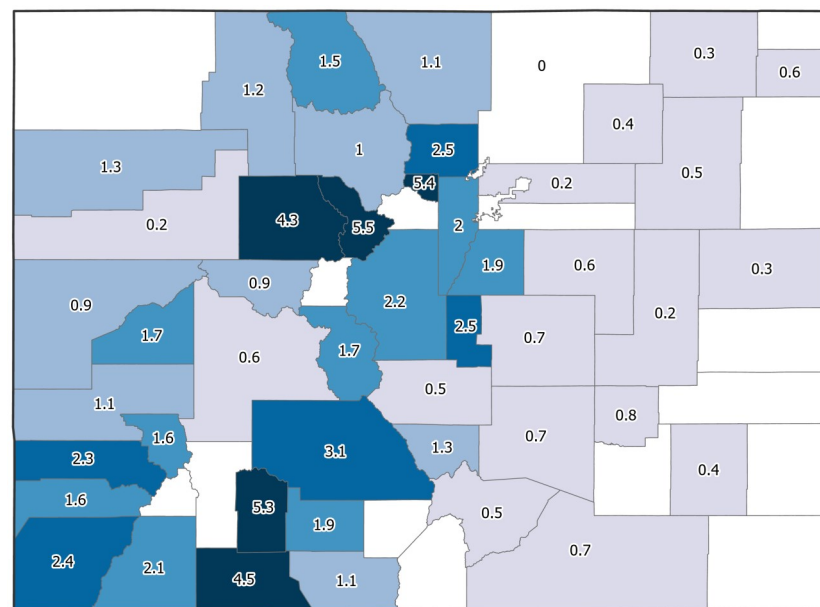

Percentage of Colorado Farms Reporting an Agroforestry Practice in 2017

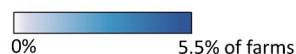

| County*   | Number of Farms with an Agroforestry Practice | Total Number of Farms | Percent of Farms with an Agroforestry Practice |
|-----------|-----------------------------------------------|-----------------------|------------------------------------------------|
| Adams     | 2                                             | 905                   | 0.2%                                           |
| Archuleta | 18                                            | 399                   | 4.5%                                           |
| Bent      | 1                                             | 274                   | 0.4%                                           |
| Boulder   | 25                                            | 1,012                 | 2.5%                                           |
| Chaffee   | 5                                             | 289                   | 1.7%                                           |
| Conejos   | 6                                             | 524                   | 1.1%                                           |
| Crowley   | 2                                             | 246                   | 0.8%                                           |

| County* | Number of Farms with an Agroforestry Practice | Total Number of Farms | Percent of Farms with an Agroforestry Practice |
|---------|-----------------------------------------------|-----------------------|------------------------------------------------|
| Custer  | 4                                             | 315                   | 1.3%                                           |
| Delta   | 27                                            | 1,615                 | 1.7%                                           |
| Dolores | 5                                             | 313                   | 1.6%                                           |
| Douglas | 23                                            | 1,223                 | 1.9%                                           |
| Eagle   | 11                                            | 257                   | 4.3%                                           |
| El Paso | 9                                             | 1,345                 | 0.7%                                           |
| Elbert  | 9                                             | 1,632                 | 0.6%                                           |

## Agroforestry in Colorado based on the 2017 Census of Agriculture

| County*    | Number of Farms with an Agroforestry Practice | Total Number of Farms | Percent of Farms with an Agroforestry Practice |
|------------|-----------------------------------------------|-----------------------|------------------------------------------------|
| Fremont    | 5                                             | 1,034                 | 0.5%                                           |
| Garfield   | 1                                             | 661                   | 0.2%                                           |
| Gilpin     | 2                                             | 37                    | 5.4%                                           |
| Grand      | 3                                             | 290                   | 1.0%                                           |
| Gunnison   | 2                                             | 309                   | 0.6%                                           |
| Huerfano   | 2                                             | 437                   | 0.5%                                           |
| Jackson    | 2                                             | 131                   | 1.5%                                           |
| Jefferson  | 12                                            | 597                   | 2.0%                                           |
| Kit Carson | 2                                             | 574                   | 0.3%                                           |
| La Plata   | 23                                            | 1,093                 | 2.1%                                           |
| Larimer    | 23                                            | 2,043                 | 1.1%                                           |
| Las Animas | 4                                             | 549                   | 0.7%                                           |
| Lincoln    | 1                                             | 489                   | 0.2%                                           |
| Logan      | 3                                             | 861                   | 0.3%                                           |
| Mesa       | 22                                            | 2,465                 | 0.9%                                           |
| Mineral    | 1                                             | 19                    | 5.3%                                           |
| Montezuma  | 27                                            | 1,123                 | 2.4%                                           |

| County*    | Number of Farms with an Agroforestry Practice | Total Number of Farms | Percent of Farms with an Agroforestry Practice |
|------------|-----------------------------------------------|-----------------------|------------------------------------------------|
| Montrose   | 13                                            | 1,135                 | 1.1%                                           |
| Morgan     | 3                                             | 740                   | 0.4%                                           |
| Ouray      | 2                                             | 122                   | 1.6%                                           |
| Park       | 6                                             | 278                   | 2.2%                                           |
| Phillips   | 2                                             | 326                   | 0.6%                                           |
| Pitkin     | 1                                             | 112                   | 0.9%                                           |
| Pueblo     | 6                                             | 839                   | 0.7%                                           |
| Rio Blanco | 4                                             | 320                   | 1.3%                                           |
| Rio Grande | 6                                             | 321                   | 1.9%                                           |
| Routt      | 11                                            | 887                   | 1.2%                                           |
| Saguache   | 9                                             | 288                   | 3.1%                                           |
| San Miguel | 3                                             | 133                   | 2.3%                                           |
| Summit     | 3                                             | 55                    | 5.5%                                           |
| Teller     | 4                                             | 159                   | 2.5%                                           |
| Washington | 4                                             | 757                   | 0.5%                                           |
| Weld       | 2                                             | 4,062                 | 0.0%                                           |

\*Counties not listed in the table have no farms reporting an agroforestry practice in 2017.

**Total number of Colorado farms with an agroforestry practice: 361    Total number of Colorado farms: 38,893**

**Percentage of Colorado farms with an agroforestry practice: 0.9%**

**Data Source: USDA NASS Census of Agriculture 2017**

**Maps and table created by USDA National Agroforestry Center**

# Agroforestry in Connecticut based on the 2017 Census of Agriculture

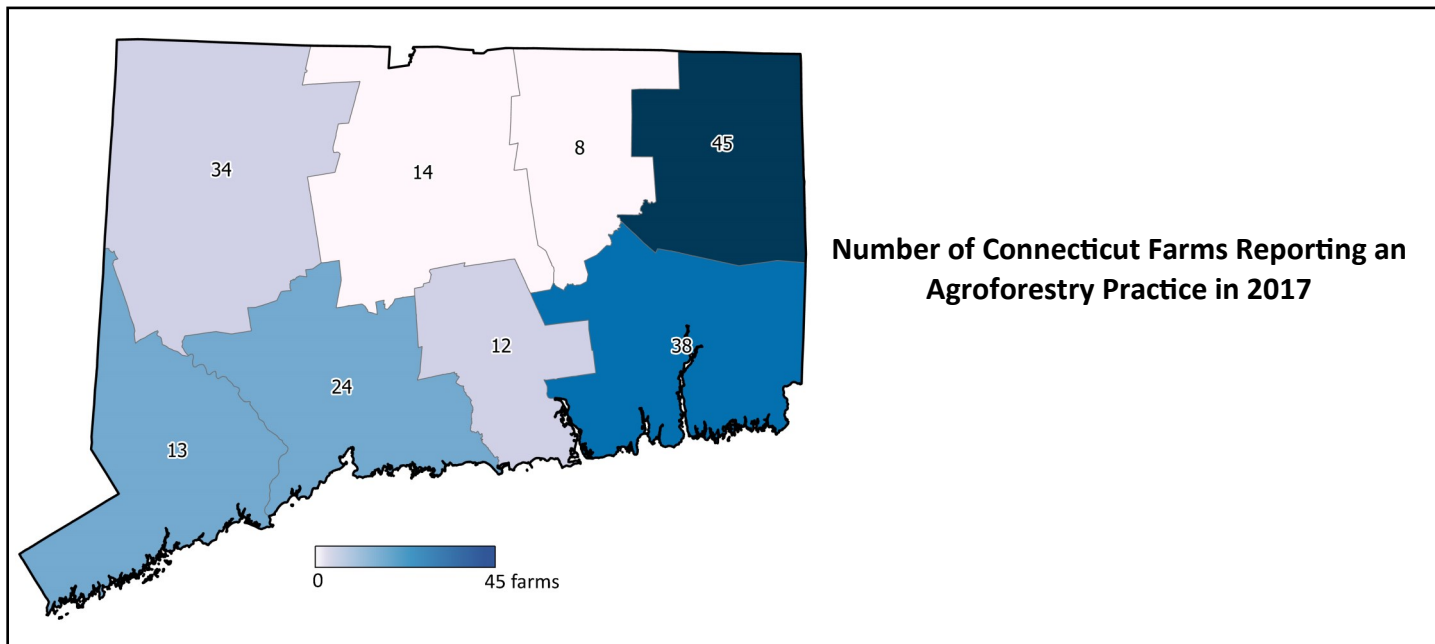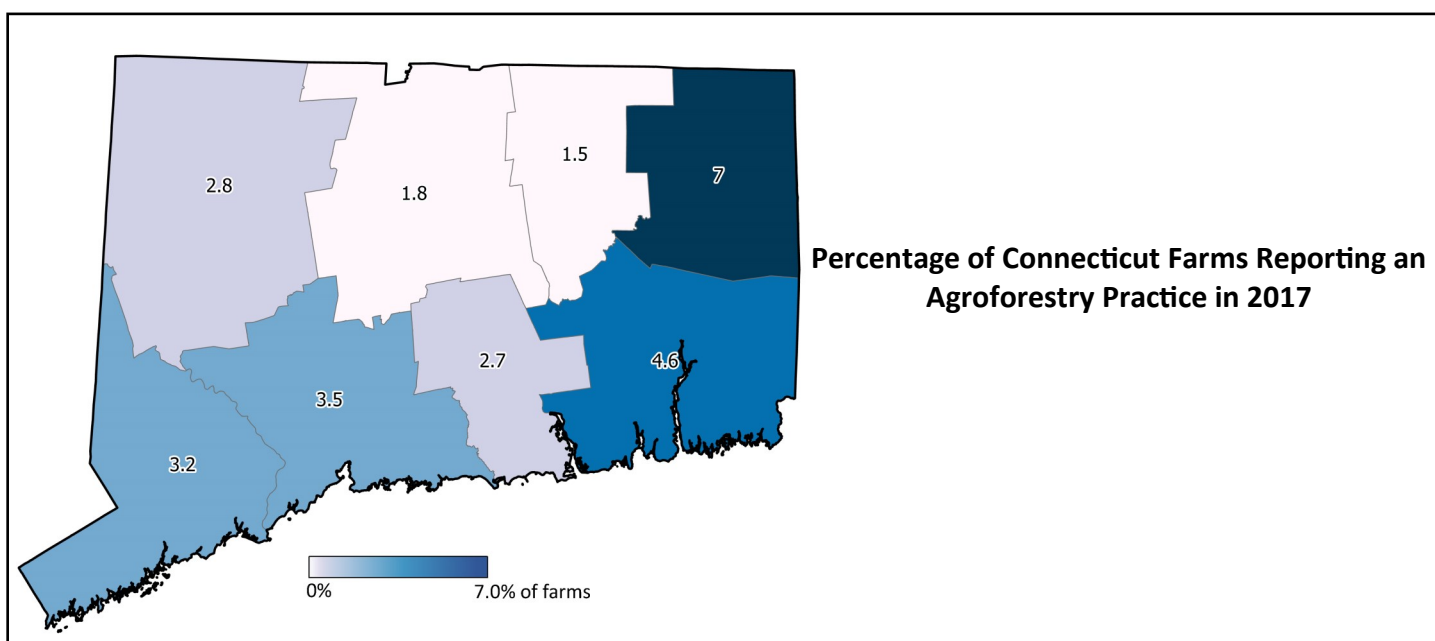

| County     | Number of Farms with an Agroforestry Practice | Total Number of Farms | Percent of Farms with an Agroforestry Practice |
|------------|-----------------------------------------------|-----------------------|------------------------------------------------|
| Fairfield  | 13                                            | 402                   | 3.2%                                           |
| Hartford   | 14                                            | 786                   | 1.8%                                           |
| Litchfield | 34                                            | 1,217                 | 2.8%                                           |
| Middlesex  | 12                                            | 441                   | 2.7%                                           |

| County*    | Number of Farms with an Agroforestry Practice | Total Number of Farms | Percent of Farms with an Agroforestry Practice |
|------------|-----------------------------------------------|-----------------------|------------------------------------------------|
| New Haven  | 24                                            | 686                   | 3.5%                                           |
| New London | 38                                            | 823                   | 4.6%                                           |
| Tolland    | 8                                             | 520                   | 1.5%                                           |
| Windham    | 45                                            | 646                   | 7.0%                                           |

Total number of Connecticut farms with an agroforestry practice: 188 Total number of Connecticut farms: 5,521

Percentage of Connecticut farms with an agroforestry practice: 3.4%

Data Source: USDA NASS Census of Agriculture 2017

Maps and table created by USDA National Agroforestry Center

# Agroforestry in Delaware based on the 2017 Census of Agriculture

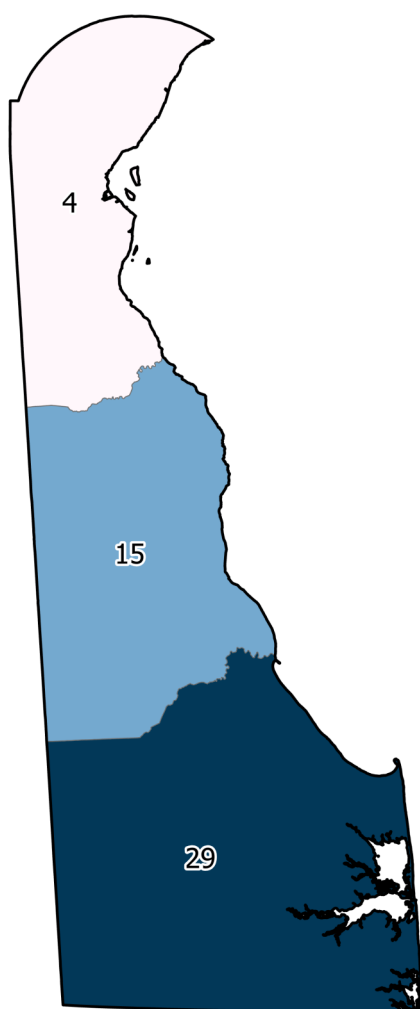

**Number of Delaware Farms Reporting an Agroforestry Practice in 2017**

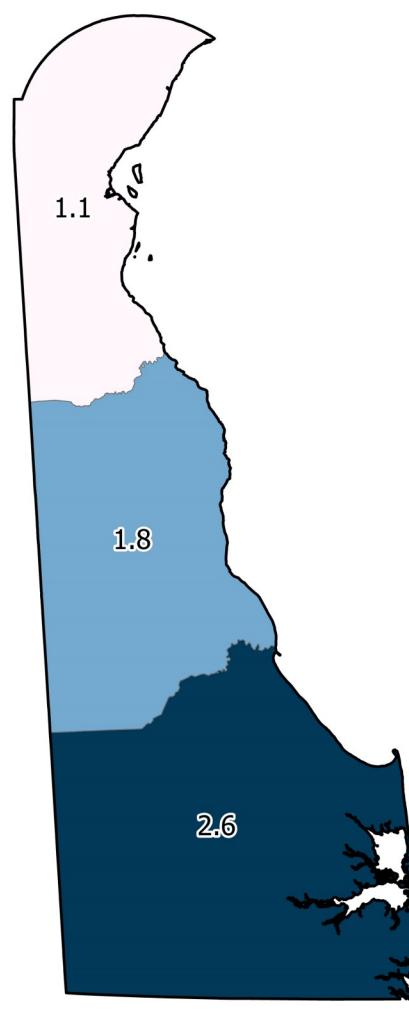

**Percentage of Delaware Farms Reporting an Agroforestry Practice in 2017**

| County     | Number of Farms with an Agroforestry Practice | Total Number of Farms | Percent of Farms with an Agroforestry Practice |
|------------|-----------------------------------------------|-----------------------|------------------------------------------------|
| Kent       | 15                                            | 822                   | 1.8%                                           |
| New Castle | 4                                             | 361                   | 1.1%                                           |

| County | Number of Farms with an Agroforestry Practice | Total Number of Farms | Percent of Farms with an Agroforestry Practice |
|--------|-----------------------------------------------|-----------------------|------------------------------------------------|
| Sussex | 29                                            | 1,119                 | 2.6%                                           |

Total number of Delaware farms with an agroforestry practice: 48 Total number of Delaware farms: 2,302

Percentage of Delaware farms with an agroforestry practice: 2.0%

Data Source: USDA NASS Census of Agriculture 2017

Maps and table created by USDA National Agroforestry Center

# Agroforestry in Florida based on the 2017 Census of Agriculture

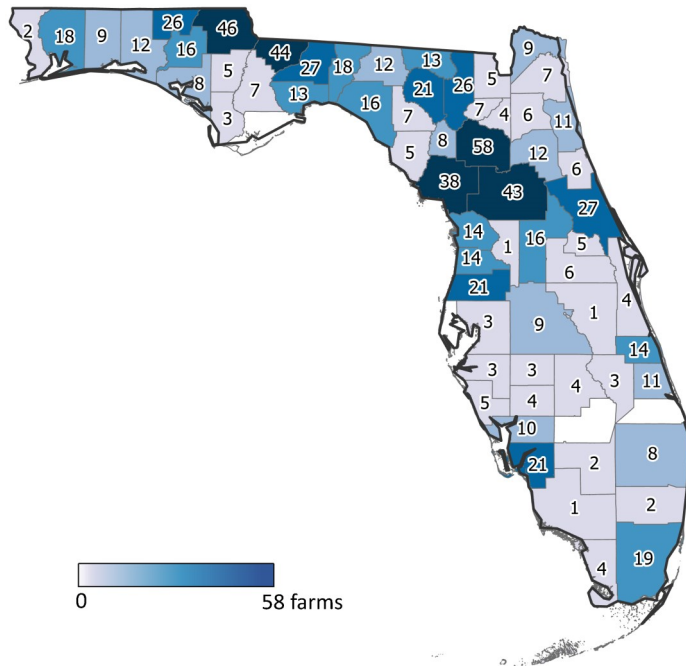

**Number of Florida Farms Reporting an Agroforestry Practice in 2017**

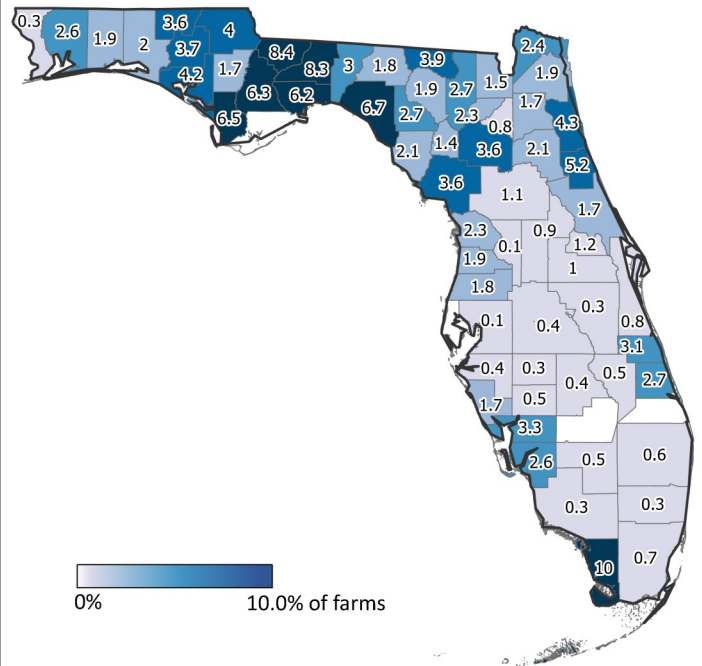

**Percentage of Florida Farms Reporting an Agroforestry Practice in 2017**

| County*   | Number of Farms with an Agroforestry Practice | Total Number of Farms | Percent of Farms with an Agroforestry Practice |
|-----------|-----------------------------------------------|-----------------------|------------------------------------------------|
| Alachua   | 58                                            | 1,611                 | 3.6%                                           |
| Baker     | 5                                             | 328                   | 1.5%                                           |
| Bay       | 8                                             | 190                   | 4.2%                                           |
| Bradford  | 4                                             | 490                   | 0.8%                                           |
| Brevard   | 4                                             | 522                   | 0.8%                                           |
| Broward   | 2                                             | 640                   | 0.3%                                           |
| Calhoun   | 5                                             | 289                   | 1.7%                                           |
| Charlotte | 10                                            | 306                   | 3.3%                                           |
| Citrus    | 14                                            | 609                   | 2.3%                                           |
| Clay      | 6                                             | 361                   | 1.7%                                           |
| Collier   | 1                                             | 322                   | 0.3%                                           |
| Columbia  | 26                                            | 979                   | 2.7%                                           |
| DeSoto    | 4                                             | 761                   | 0.5%                                           |
| Dixie     | 5                                             | 235                   | 2.1%                                           |
| Duval     | 7                                             | 366                   | 1.9%                                           |
| Escambia  | 2                                             | 649                   | 0.3%                                           |
| Flagler   | 6                                             | 116                   | 5.2%                                           |
| Gadsden   | 44                                            | 522                   | 8.4%                                           |
| Gilchrist | 8                                             | 565                   | 1.4%                                           |
| Gulf      | 3                                             | 46                    | 6.5%                                           |

| County*      | Number of Farms with an Agroforestry Practice | Total Number of Farms | Percent of Farms with an Agroforestry Practice |
|--------------|-----------------------------------------------|-----------------------|------------------------------------------------|
| Hamilton     | 13                                            | 338                   | 3.8%                                           |
| Hardee       | 3                                             | 1,038                 | 0.3%                                           |
| Hendry       | 2                                             | 436                   | 0.5%                                           |
| Hernando     | 14                                            | 747                   | 1.9%                                           |
| Highlands    | 4                                             | 989                   | 0.4%                                           |
| Hillsborough | 3                                             | 2,265                 | 0.1%                                           |
| Holmes       | 26                                            | 721                   | 3.6%                                           |
| Indian River | 14                                            | 450                   | 3.1%                                           |
| Jackson      | 46                                            | 1,154                 | 4.0%                                           |
| Jefferson    | 18                                            | 592                   | 3.0%                                           |
| Lafayette    | 7                                             | 257                   | 2.7%                                           |
| Lake         | 16                                            | 1,703                 | 0.9%                                           |
| Lee          | 21                                            | 800                   | 2.6%                                           |
| Leon         | 27                                            | 325                   | 8.3%                                           |
| Levy         | 38                                            | 1,058                 | 3.6%                                           |
| Liberty      | 7                                             | 111                   | 6.3%                                           |
| Madison      | 12                                            | 669                   | 1.8%                                           |
| Manatee      | 3                                             | 753                   | 0.4%                                           |
| Marion       | 43                                            | 3,985                 | 1.1%                                           |
| Miami-Dade   | 19                                            | 2,752                 | 0.7%                                           |

## Agroforestry in Florida based on the 2017 Census of Agriculture

| County*    | Number of Farms with an Agroforestry Practice | Total Number of Farms | Percent of Farms with an Agroforestry Practice |
|------------|-----------------------------------------------|-----------------------|------------------------------------------------|
| Monroe     | 4                                             | 40                    | 10.0%                                          |
| Nassau     | 9                                             | 373                   | 2.4%                                           |
| Okaloosa   | 9                                             | 481                   | 1.9%                                           |
| Okeechobee | 3                                             | 599                   | 0.5%                                           |
| Orange     | 6                                             | 622                   | 1.0%                                           |
| Osceola    | 1                                             | 392                   | 0.3%                                           |
| Palm Beach | 8                                             | 1,298                 | 0.6%                                           |
| Pasco      | 21                                            | 1,165                 | 1.8%                                           |
| Polk       | 9                                             | 2,080                 | 0.4%                                           |
| Putnam     | 12                                            | 564                   | 2.1%                                           |
| Santa Rosa | 18                                            | 699                   | 2.6%                                           |
| Sarasota   | 5                                             | 292                   | 1.7%                                           |

| County*    | Number of Farms with an Agroforestry Practice | Total Number of Farms | Percent of Farms with an Agroforestry Practice |
|------------|-----------------------------------------------|-----------------------|------------------------------------------------|
| Seminole   | 5                                             | 403                   | 1.2%                                           |
| St. Johns  | 11                                            | 253                   | 4.3%                                           |
| St. Lucie  | 11                                            | 415                   | 2.7%                                           |
| Sumter     | 1                                             | 1,307                 | 0.1%                                           |
| Suwannee   | 21                                            | 1,079                 | 1.9%                                           |
| Taylor     | 16                                            | 240                   | 6.7%                                           |
| Union      | 7                                             | 308                   | 2.3%                                           |
| Volusia    | 27                                            | 1,575                 | 1.7%                                           |
| Wakulla    | 13                                            | 209                   | 6.2%                                           |
| Walton     | 12                                            | 598                   | 2.0%                                           |
| Washington | 16                                            | 437                   | 3.7%                                           |

\*Counties not listed in the table have no farms reporting an agroforestry practice in 2017.

**Total number of Florida farms with an agroforestry practice: 803    Total number of Florida farms: 47,590**

**Percentage of Florida farms with an agroforestry practice: 1.7%**

**Data Source: USDA NASS Census of Agriculture 2017**

**Maps and table created by USDA National Agroforestry Center**

# Agroforestry in Georgia based on the 2017 Census of Agriculture

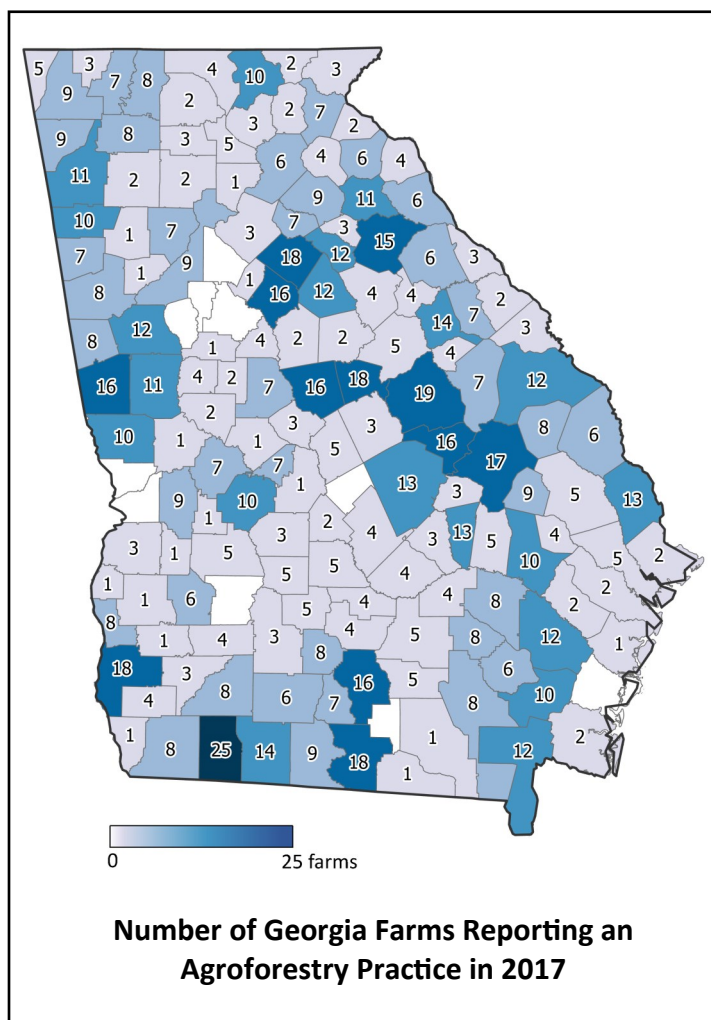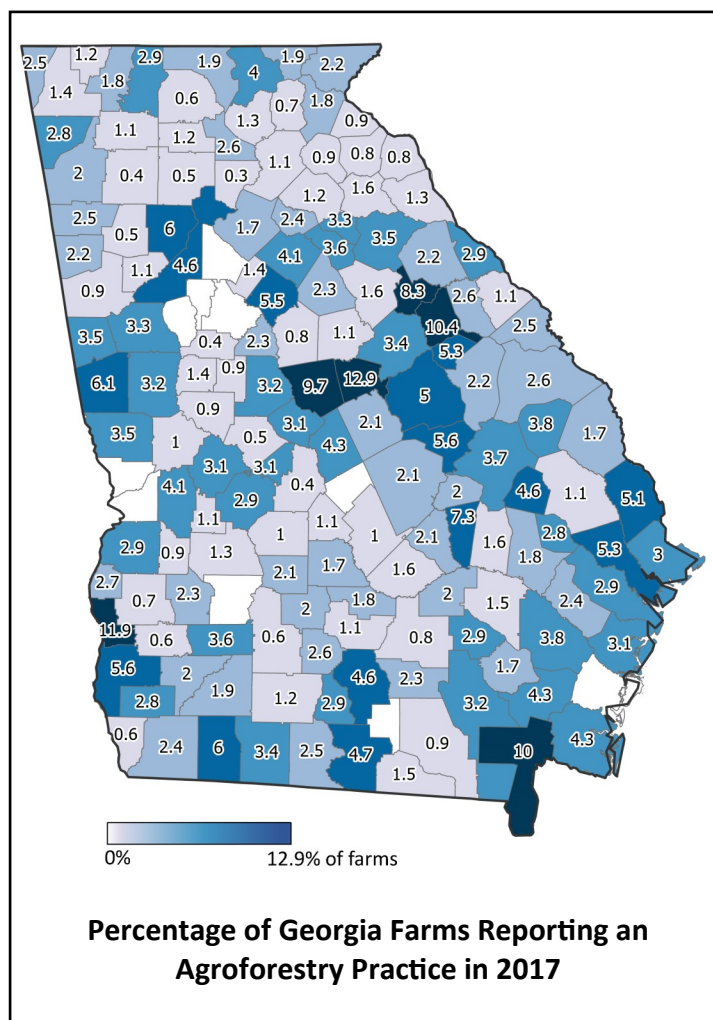

| County*  | Number of Farms with an Agroforestry Practice | Total Number of Farms | Percent of Farms with an Agroforestry Practice |
|----------|-----------------------------------------------|-----------------------|------------------------------------------------|
| Appling  | 8                                             | 548                   | 1.5%                                           |
| Atkinson | 5                                             | 215                   | 2.3%                                           |
| Bacon    | 8                                             | 273                   | 2.9%                                           |
| Baker    | 3                                             | 147                   | 2.0%                                           |
| Baldwin  | 18                                            | 139                   | 12.9%                                          |
| Banks    | 4                                             | 463                   | 0.9%                                           |
| Barrow   | 7                                             | 288                   | 2.4%                                           |
| Bartow   | 2                                             | 469                   | 0.4%                                           |
| Ben Hill | 4                                             | 217                   | 1.8%                                           |
| Berrien  | 16                                            | 349                   | 4.6%                                           |
| Bibb     | 3                                             | 98                    | 3.1%                                           |
| Brantley | 10                                            | 235                   | 4.3%                                           |
| Brooks   | 9                                             | 360                   | 2.5%                                           |
| Bryan    | 5                                             | 95                    | 5.3%                                           |
| Bulloch  | 5                                             | 478                   | 1.0%                                           |
| Burke    | 12                                            | 467                   | 2.6%                                           |

| County*   | Number of Farms with an Agroforestry Practice | Total Number of Farms | Percent of Farms with an Agroforestry Practice |
|-----------|-----------------------------------------------|-----------------------|------------------------------------------------|
| Butts     | 4                                             | 173                   | 2.3%                                           |
| Calhoun   | 1                                             | 169                   | 0.6%                                           |
| Camden    | 2                                             | 47                    | 4.3%                                           |
| Candler   | 9                                             | 197                   | 4.6%                                           |
| Carroll   | 8                                             | 867                   | 0.9%                                           |
| Catoosa   | 3                                             | 250                   | 1.2%                                           |
| Charlton  | 12                                            | 120                   | 10.0%                                          |
| Chatham   | 2                                             | 67                    | 3.0%                                           |
| Chattooga | 9                                             | 323                   | 2.8%                                           |
| Cherokee  | 2                                             | 430                   | 0.5%                                           |
| Clarke    | 3                                             | 91                    | 3.3%                                           |
| Clay      | 8                                             | 67                    | 11.9%                                          |
| Clinch    | 1                                             | 113                   | 0.9%                                           |
| Cobb      | 7                                             | 116                   | 6.0%                                           |
| Coffee    | 5                                             | 608                   | 0.8%                                           |
| Colquitt  | 6                                             | 498                   | 1.2%                                           |

## Agroforestry in Georgia based on the 2017 Census of Agriculture

| County*    | Number of Farms with an Agroforestry Practice | Total Number of Farms | Percent of Farms with an Agroforestry Practice |
|------------|-----------------------------------------------|-----------------------|------------------------------------------------|
| Columbia   | 2                                             | 183                   | 1.1%                                           |
| Cook       | 7                                             | 239                   | 2.9%                                           |
| Coweta     | 12                                            | 368                   | 3.3%                                           |
| Crawford   | 1                                             | 192                   | 0.5%                                           |
| Crisp      | 5                                             | 236                   | 2.1%                                           |
| Dade       | 5                                             | 198                   | 2.5%                                           |
| Dawson     | 5                                             | 192                   | 2.6%                                           |
| Decatur    | 8                                             | 337                   | 2.4%                                           |
| Dodge      | 4                                             | 391                   | 1.0%                                           |
| Dooly      | 3                                             | 297                   | 1.0%                                           |
| Dougherty  | 4                                             | 110                   | 3.6%                                           |
| Douglas    | 1                                             | 93                    | 1.1%                                           |
| Early      | 18                                            | 321                   | 5.6%                                           |
| Echols     | 1                                             | 66                    | 1.5%                                           |
| Effingham  | 13                                            | 254                   | 5.1%                                           |
| Elbert     | 6                                             | 453                   | 1.3%                                           |
| Emanuel    | 17                                            | 465                   | 3.7%                                           |
| Evans      | 4                                             | 143                   | 2.8%                                           |
| Fannin     | 4                                             | 211                   | 1.9%                                           |
| Floyd      | 11                                            | 547                   | 2.0%                                           |
| Forsyth    | 1                                             | 291                   | 0.3%                                           |
| Franklin   | 6                                             | 753                   | 0.8%                                           |
| Fulton     | 9                                             | 195                   | 4.6%                                           |
| Gilmer     | 2                                             | 330                   | 0.6%                                           |
| Glascock   | 4                                             | 76                    | 5.3%                                           |
| Gordon     | 8                                             | 740                   | 1.1%                                           |
| Grady      | 25                                            | 415                   | 6.0%                                           |
| Greene     | 4                                             | 248                   | 1.6%                                           |
| Gwinnett   | 3                                             | 177                   | 1.7%                                           |
| Habersham  | 7                                             | 379                   | 1.8%                                           |
| Hall       | 6                                             | 551                   | 1.1%                                           |
| Hancock    | 5                                             | 145                   | 3.4%                                           |
| Haralson   | 7                                             | 321                   | 2.2%                                           |
| Harris     | 10                                            | 289                   | 3.5%                                           |
| Hart       | 4                                             | 516                   | 0.8%                                           |
| Heard      | 8                                             | 227                   | 3.5%                                           |
| Houston    | 1                                             | 277                   | 0.4%                                           |
| Irwin      | 4                                             | 348                   | 1.1%                                           |
| Jackson    | 9                                             | 734                   | 1.2%                                           |
| Jasper     | 2                                             | 251                   | 0.8%                                           |
| Jeff Davis | 4                                             | 197                   | 2.0%                                           |
| Jefferson  | 7                                             | 318                   | 2.2%                                           |
| Jenkins    | 8                                             | 210                   | 3.8%                                           |

| County*    | Number of Farms with an Agroforestry Practice | Total Number of Farms | Percent of Farms with an Agroforestry Practice |
|------------|-----------------------------------------------|-----------------------|------------------------------------------------|
| Johnson    | 16                                            | 284                   | 5.6%                                           |
| Jones      | 16                                            | 165                   | 9.7%                                           |
| Lamar      | 2                                             | 220                   | 0.9%                                           |
| Laurens    | 13                                            | 626                   | 2.1%                                           |
| Liberty    | 2                                             | 69                    | 2.9%                                           |
| Lincoln    | 3                                             | 104                   | 2.9%                                           |
| Long       | 2                                             | 85                    | 2.4%                                           |
| Lowndes    | 18                                            | 380                   | 4.7%                                           |
| Lumpkin    | 3                                             | 240                   | 1.3%                                           |
| Macon      | 10                                            | 339                   | 2.9%                                           |
| Madison    | 11                                            | 673                   | 1.6%                                           |
| Marion     | 9                                             | 222                   | 4.1%                                           |
| McDuffie   | 7                                             | 269                   | 2.6%                                           |
| McIntosh   | 1                                             | 32                    | 3.1%                                           |
| Meriwether | 11                                            | 344                   | 3.2%                                           |
| Miller     | 4                                             | 144                   | 2.8%                                           |
| Mitchell   | 8                                             | 425                   | 1.9%                                           |
| Monroe     | 7                                             | 219                   | 3.2%                                           |
| Montgomery | 13                                            | 179                   | 7.3%                                           |
| Morgan     | 12                                            | 513                   | 2.3%                                           |
| Murray     | 8                                             | 278                   | 2.9%                                           |
| Newton     | 16                                            | 292                   | 5.5%                                           |
| Oconee     | 12                                            | 329                   | 3.6%                                           |
| Oglethorpe | 15                                            | 427                   | 3.5%                                           |
| Paulding   | 1                                             | 212                   | 0.5%                                           |
| Peach      | 7                                             | 228                   | 3.1%                                           |
| Pickens    | 3                                             | 258                   | 1.2%                                           |
| Pierce     | 6                                             | 352                   | 1.7%                                           |
| Pike       | 4                                             | 286                   | 1.4%                                           |
| Polk       | 10                                            | 401                   | 2.5%                                           |
| Pulaski    | 2                                             | 189                   | 1.1%                                           |
| Putnam     | 2                                             | 186                   | 1.1%                                           |
| Quitman    | 1                                             | 37                    | 2.7%                                           |
| Rabun      | 3                                             | 135                   | 2.2%                                           |
| Randolph   | 1                                             | 153                   | 0.7%                                           |
| Richmond   | 3                                             | 118                   | 2.5%                                           |
| Rockdale   | 1                                             | 74                    | 1.4%                                           |
| Schley     | 1                                             | 89                    | 1.1%                                           |
| Screven    | 6                                             | 352                   | 1.7%                                           |
| Seminole   | 1                                             | 157                   | 0.6%                                           |
| Spalding   | 1                                             | 225                   | 0.4%                                           |
| Stephens   | 2                                             | 227                   | 0.9%                                           |
| Stewart    | 3                                             | 104                   | 2.9%                                           |

## Agroforestry in Georgia based on the 2017 Census of Agriculture

| County*    | Number of Farms with an Agroforestry Practice | Total Number of Farms | Percent of Farms with an Agroforestry Practice |
|------------|-----------------------------------------------|-----------------------|------------------------------------------------|
| Sumter     | 5                                             | 371                   | 1.3%                                           |
| Talbot     | 1                                             | 102                   | 1.0%                                           |
| Taliaferro | 4                                             | 48                    | 8.3%                                           |
| Tattnall   | 10                                            | 547                   | 1.8%                                           |
| Taylor     | 7                                             | 224                   | 3.1%                                           |
| Telfair    | 4                                             | 255                   | 1.6%                                           |
| Terrell    | 6                                             | 256                   | 2.3%                                           |
| Thomas     | 14                                            | 408                   | 3.4%                                           |
| Tift       | 8                                             | 306                   | 2.6%                                           |
| Toombs     | 5                                             | 320                   | 1.6%                                           |
| Towns      | 2                                             | 105                   | 1.9%                                           |
| Treutlen   | 3                                             | 148                   | 2.0%                                           |
| Troup      | 16                                            | 261                   | 6.1%                                           |
| Turner     | 5                                             | 246                   | 2.0%                                           |
| Twiggs     | 5                                             | 116                   | 4.3%                                           |
| Union      | 10                                            | 251                   | 4.0%                                           |

| County*    | Number of Farms with an Agroforestry Practice | Total Number of Farms | Percent of Farms with an Agroforestry Practice |
|------------|-----------------------------------------------|-----------------------|------------------------------------------------|
| Upson      | 2                                             | 235                   | 0.9%                                           |
| Walker     | 9                                             | 624                   | 1.4%                                           |
| Walton     | 18                                            | 437                   | 4.1%                                           |
| Ware       | 8                                             | 248                   | 3.2%                                           |
| Warren     | 14                                            | 135                   | 10.4%                                          |
| Washington | 19                                            | 383                   | 5.0%                                           |
| Wayne      | 12                                            | 316                   | 3.8%                                           |
| Webster    | 1                                             | 109                   | 0.9%                                           |
| Wheeler    | 3                                             | 143                   | 2.1%                                           |
| White      | 2                                             | 301                   | 0.7%                                           |
| Whitfield  | 7                                             | 386                   | 1.8%                                           |
| Wilcox     | 5                                             | 287                   | 1.7%                                           |
| Wilkes     | 6                                             | 277                   | 2.2%                                           |
| Wilkinson  | 3                                             | 140                   | 2.1%                                           |
| Worth      | 3                                             | 469                   | 0.6%                                           |

\*Counties not listed in the table have no farms reporting an agroforestry practice in 2017.

Total number of Georgia farms with an agroforestry practice: 969 Total number of Georgia farms: 42.439

Percentage of Georgia farms with an agroforestry practice: 2.3%

Data Source: USDA NASS Census of Agriculture 2017

Maps and table created by USDA National Agroforestry Center

# Agroforestry in Hawaii based on the 2017 Census of Agriculture

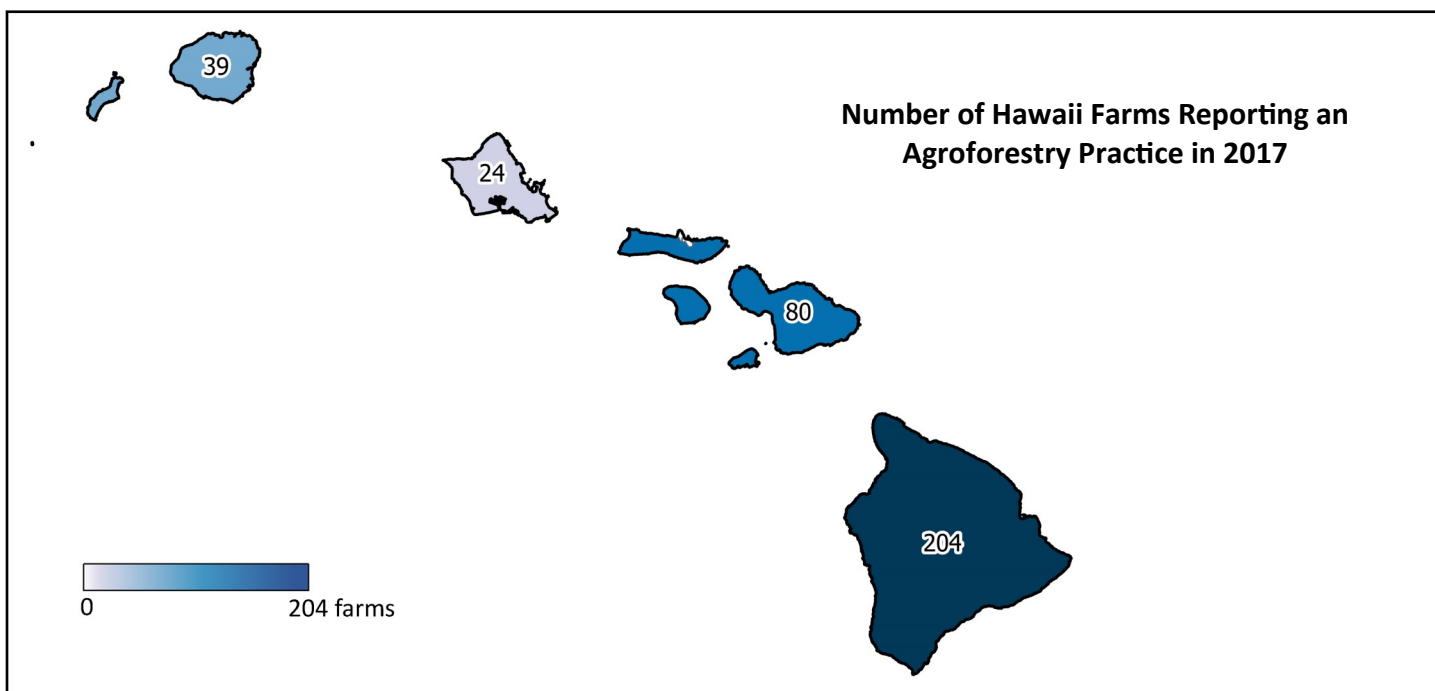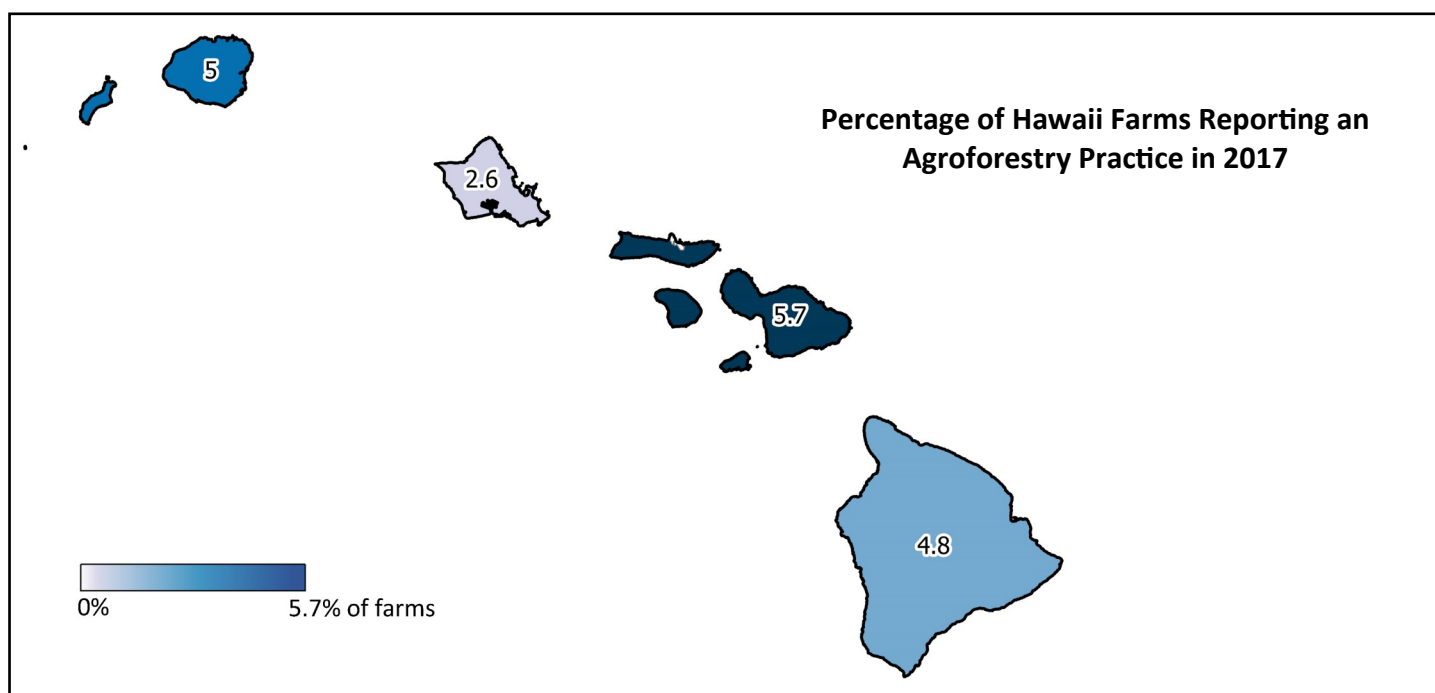

| County   | Number of Farms with an Agroforestry Practice | Total Number of Farms | Percent of Farms with an Agroforestry Practice |
|----------|-----------------------------------------------|-----------------------|------------------------------------------------|
| Hawaii   | 204                                           | 4,220                 | 4.8%                                           |
| Honolulu | 24                                            | 927                   | 2.6%                                           |

| County | Number of Farms with an Agroforestry Practice | Total Number of Farms | Percent of Farms with an Agroforestry Practice |
|--------|-----------------------------------------------|-----------------------|------------------------------------------------|
| Kauai  | 39                                            | 773                   | 5.0%                                           |
| Maui   | 80                                            | 1,408                 | 5.7%                                           |

Total number of Hawaii farms with an agroforestry practice: 347 Total number of Hawaii farms: 7,328

Percentage of Hawaii farms with an agroforestry practice: 4.7%

Data Source: USDA NASS Census of Agriculture 2017

Maps and table created by USDA National Agroforestry Center

# Agroforestry in Idaho based on the 2017 Census of Agriculture

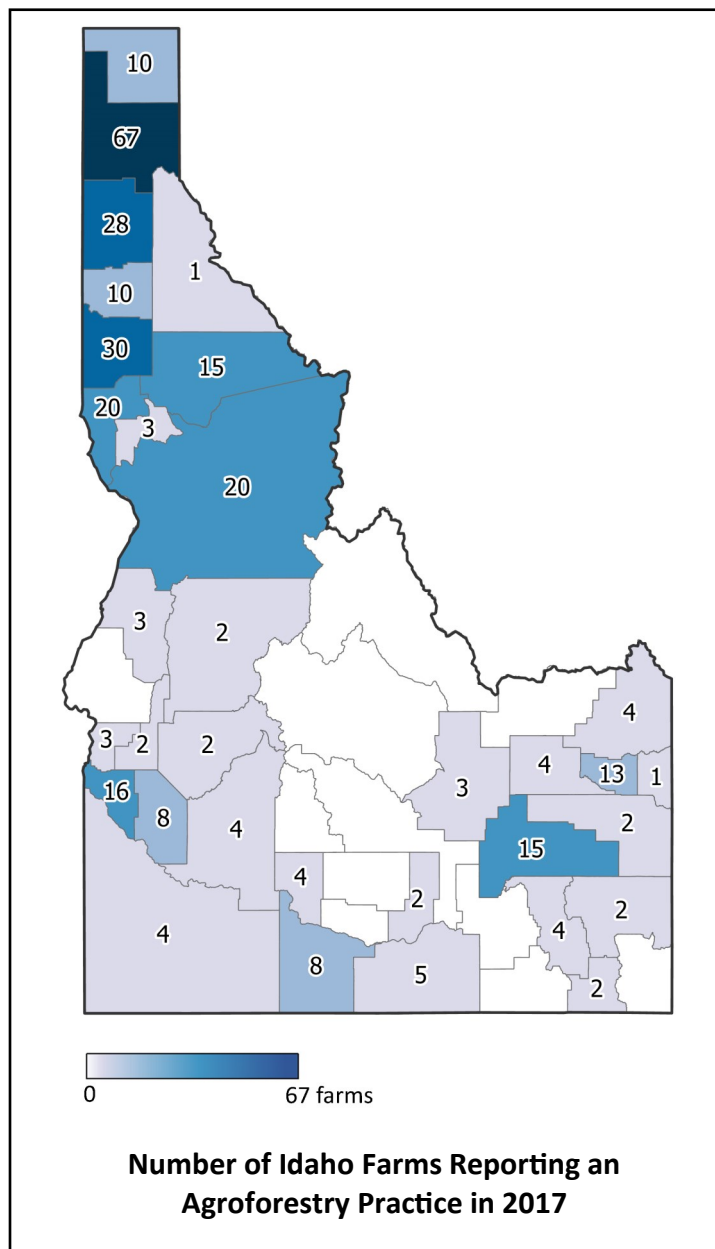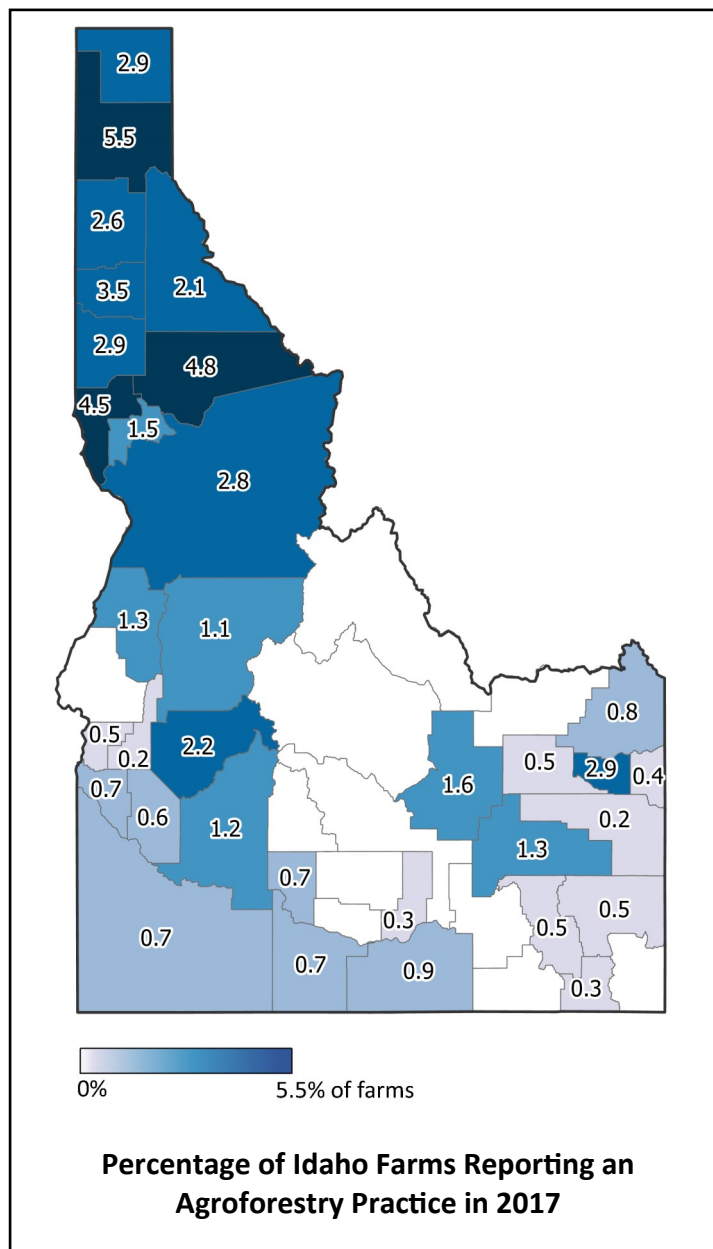

| County*    | Number of Farms with an Agroforestry Practice | Total Number of Farms | Percent of Farms with an Agroforestry Practice |
|------------|-----------------------------------------------|-----------------------|------------------------------------------------|
| Ada        | 8                                             | 1,304                 | 0.6%                                           |
| Adams      | 3                                             | 232                   | 1.3%                                           |
| Bannock    | 4                                             | 757                   | 0.5%                                           |
| Benewah    | 10                                            | 288                   | 3.5%                                           |
| Bingham    | 15                                            | 1,177                 | 1.3%                                           |
| Boise      | 2                                             | 90                    | 2.2%                                           |
| Bonner     | 67                                            | 1,213                 | 5.5%                                           |
| Bonneville | 2                                             | 1,109                 | 0.2%                                           |
| Boundary   | 10                                            | 348                   | 2.9%                                           |
| Butte      | 3                                             | 189                   | 1.6%                                           |

| County*    | Number of Farms with an Agroforestry Practice | Total Number of Farms | Percent of Farms with an Agroforestry Practice |
|------------|-----------------------------------------------|-----------------------|------------------------------------------------|
| Canyon     | 16                                            | 2,289                 | 0.7%                                           |
| Caribou    | 2                                             | 411                   | 0.5%                                           |
| Cassia     | 5                                             | 585                   | 0.9%                                           |
| Clearwater | 15                                            | 312                   | 4.8%                                           |
| Elmore     | 4                                             | 340                   | 1.2%                                           |
| Franklin   | 2                                             | 787                   | 0.3%                                           |
| Fremont    | 4                                             | 513                   | 0.8%                                           |
| Gem        | 2                                             | 860                   | 0.2%                                           |
| Gooding    | 4                                             | 538                   | 0.7%                                           |
| Idaho      | 20                                            | 708                   | 2.8%                                           |

## Agroforestry in Idaho based on the 2017 Census of Agriculture

| County*   | Number of Farms with an Agroforestry Practice | Total Number of Farms | Percent of Farms with an Agroforestry Practice |
|-----------|-----------------------------------------------|-----------------------|------------------------------------------------|
| Jefferson | 4                                             | 750                   | 0.5%                                           |
| Kootenai  | 28                                            | 1,073                 | 2.6%                                           |
| Latah     | 30                                            | 1,041                 | 2.9%                                           |
| Lewis     | 3                                             | 197                   | 1.5%                                           |
| Madison   | 13                                            | 454                   | 2.9%                                           |
| Minidoka  | 2                                             | 620                   | 0.3%                                           |
| Nez Perce | 20                                            | 446                   | 4.5%                                           |

| County*    | Number of Farms with an Agroforestry Practice | Total Number of Farms | Percent of Farms with an Agroforestry Practice |
|------------|-----------------------------------------------|-----------------------|------------------------------------------------|
| Owyhee     | 4                                             | 565                   | 0.7%                                           |
| Payette    | 3                                             | 640                   | 0.5%                                           |
| Shoshone   | 1                                             | 48                    | 2.1%                                           |
| Teton      | 1                                             | 277                   | 0.4%                                           |
| Twin Falls | 8                                             | 1,211                 | 0.7%                                           |
| Valley     | 2                                             | 188                   | 1.1%                                           |

\*Counties not listed in the table have no farms reporting an agroforestry practice in 2017.

Total number of Idaho farms with an agroforestry practice: 317    Total number of Idaho farms: 24,996

Percentage of Idaho farms with an agroforestry practice: 1.3%

Data Source: USDA NASS Census of Agriculture 2017

Maps and table created by USDA National Agroforestry Center

# Agroforestry in Illinois based on the 2017 Census of Agriculture

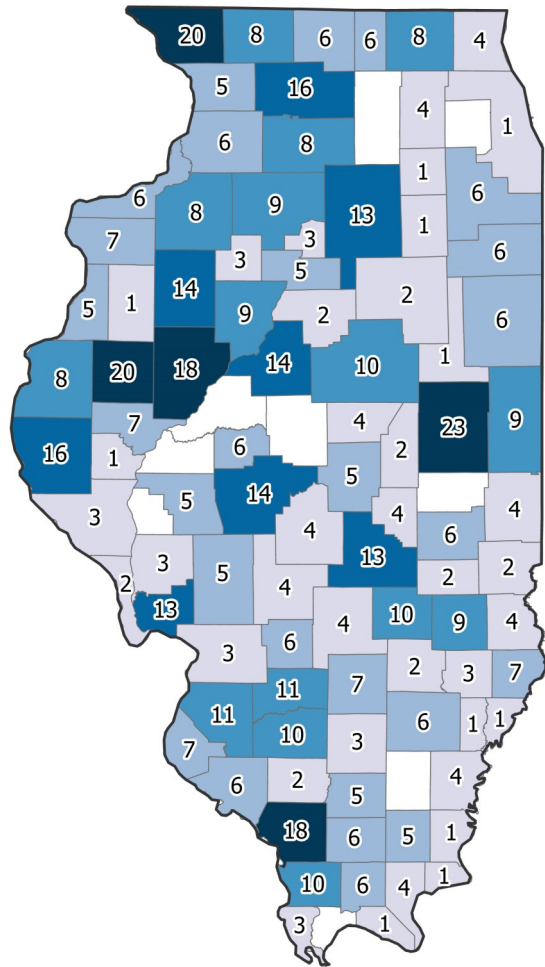

0 23 farms

**Number of Illinois Farms Reporting an Agroforestry Practice in 2017**

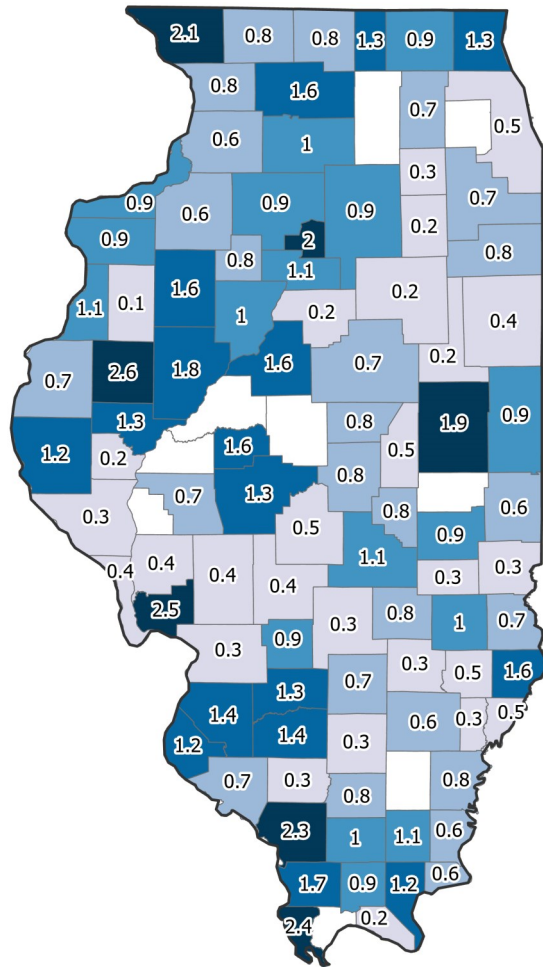

0% 2.6% of farms

**Percentage of Illinois Farms Reporting an Agroforestry Practice in 2017**

| County*   | Number of Farms with an Agroforestry Practice | Total Number of Farms | Percent of Farms with an Agroforestry Practice |
|-----------|-----------------------------------------------|-----------------------|------------------------------------------------|
| Adams     | 16                                            | 1,308                 | 1.2%                                           |
| Alexander | 3                                             | 126                   | 2.4%                                           |
| Bond      | 6                                             | 637                   | 0.9%                                           |
| Boone     | 6                                             | 457                   | 1.3%                                           |
| Brown     | 1                                             | 419                   | 0.2%                                           |
| Bureau    | 9                                             | 1,038                 | 0.9%                                           |
| Calhoun   | 2                                             | 474                   | 0.4%                                           |
| Carroll   | 5                                             | 627                   | 0.8%                                           |
| Champaign | 23                                            | 1,214                 | 1.9%                                           |
| Christian | 4                                             | 794                   | 0.5%                                           |
| Clark     | 2                                             | 733                   | 0.3%                                           |

| County*    | Number of Farms with an Agroforestry Practice | Total Number of Farms | Percent of Farms with an Agroforestry Practice |
|------------|-----------------------------------------------|-----------------------|------------------------------------------------|
| Clay       | 2                                             | 732                   | 0.3%                                           |
| Clinton    | 11                                            | 831                   | 1.3%                                           |
| Coles      | 6                                             | 701                   | 0.9%                                           |
| Cook       | 1                                             | 182                   | 0.5%                                           |
| Crawford   | 4                                             | 566                   | 0.7%                                           |
| Cumberland | 2                                             | 724                   | 0.3%                                           |
| De Witt    | 4                                             | 504                   | 0.8%                                           |
| Edgar      | 4                                             | 637                   | 0.6%                                           |
| Edwards    | 1                                             | 291                   | 0.3%                                           |
| Effingham  | 10                                            | 1,193                 | 0.8%                                           |
| Fayette    | 4                                             | 1,239                 | 0.3%                                           |

# Agroforestry in Illinois based on the 2017 Census of Agriculture

| County*    | Number of Farms with an Agroforestry Practice | Total Number of Farms | Percent of Farms with an Agroforestry Practice |
|------------|-----------------------------------------------|-----------------------|------------------------------------------------|
| Ford       | 1                                             | 564                   | 0.2%                                           |
| Franklin   | 5                                             | 596                   | 0.8%                                           |
| Fulton     | 18                                            | 973                   | 1.8%                                           |
| Gallatin   | 1                                             | 165                   | 0.6%                                           |
| Greene     | 3                                             | 733                   | 0.4%                                           |
| Grundy     | 1                                             | 412                   | 0.2%                                           |
| Hancock    | 8                                             | 1,109                 | 0.7%                                           |
| Hardin     | 1                                             | 161                   | 0.6%                                           |
| Henderson  | 5                                             | 438                   | 1.1%                                           |
| Henry      | 8                                             | 1,353                 | 0.6%                                           |
| Iroquois   | 6                                             | 1,516                 | 0.4%                                           |
| Jackson    | 18                                            | 772                   | 2.3%                                           |
| Jasper     | 9                                             | 913                   | 1.0%                                           |
| Jefferson  | 3                                             | 1,099                 | 0.3%                                           |
| Jersey     | 13                                            | 519                   | 2.5%                                           |
| Jo Daviess | 20                                            | 947                   | 2.1%                                           |
| Johnson    | 6                                             | 653                   | 0.9%                                           |
| Kane       | 4                                             | 605                   | 0.7%                                           |
| Kankakee   | 6                                             | 756                   | 0.8%                                           |
| Kendall    | 1                                             | 313                   | 0.3%                                           |
| Knox       | 14                                            | 853                   | 1.6%                                           |
| La Salle   | 13                                            | 1,496                 | 0.9%                                           |
| Lake       | 4                                             | 302                   | 1.3%                                           |
| Lawrence   | 7                                             | 426                   | 1.6%                                           |
| Lee        | 8                                             | 832                   | 1.0%                                           |
| Livingston | 2                                             | 1,313                 | 0.2%                                           |
| Macon      | 5                                             | 589                   | 0.8%                                           |
| Macoupin   | 5                                             | 1,169                 | 0.4%                                           |
| Madison    | 3                                             | 1,079                 | 0.3%                                           |
| Marion     | 7                                             | 1,004                 | 0.7%                                           |
| Marshall   | 5                                             | 472                   | 1.1%                                           |
| Massac     | 1                                             | 417                   | 0.2%                                           |
| McDonough  | 20                                            | 760                   | 2.6%                                           |
| McHenry    | 8                                             | 881                   | 0.9%                                           |
| McLean     | 10                                            | 1,416                 | 0.7%                                           |
| Menard     | 6                                             | 386                   | 1.6%                                           |

| County*     | Number of Farms with an Agroforestry Practice | Total Number of Farms | Percent of Farms with an Agroforestry Practice |
|-------------|-----------------------------------------------|-----------------------|------------------------------------------------|
| Mercer      | 7                                             | 748                   | 0.9%                                           |
| Monroe      | 7                                             | 568                   | 1.2%                                           |
| Montgomery  | 4                                             | 1,067                 | 0.4%                                           |
| Morgan      | 5                                             | 693                   | 0.7%                                           |
| Moultrie    | 4                                             | 526                   | 0.8%                                           |
| Ogle        | 16                                            | 1,011                 | 1.6%                                           |
| Peoria      | 9                                             | 884                   | 1.0%                                           |
| Perry       | 2                                             | 572                   | 0.3%                                           |
| Piatt       | 2                                             | 422                   | 0.5%                                           |
| Pike        | 3                                             | 956                   | 0.3%                                           |
| Pope        | 4                                             | 322                   | 1.2%                                           |
| Putnam      | 3                                             | 147                   | 2.0%                                           |
| Randolph    | 6                                             | 808                   | 0.7%                                           |
| Richland    | 3                                             | 596                   | 0.5%                                           |
| Rock Island | 6                                             | 649                   | 0.9%                                           |
| Saline      | 5                                             | 452                   | 1.1%                                           |
| Sangamon    | 14                                            | 1,083                 | 1.3%                                           |
| Schuyler    | 7                                             | 544                   | 1.3%                                           |
| Shelby      | 13                                            | 1,197                 | 1.1%                                           |
| St. Clair   | 11                                            | 793                   | 1.4%                                           |
| Stark       | 3                                             | 362                   | 0.8%                                           |
| Stephenson  | 8                                             | 965                   | 0.8%                                           |
| Tazewell    | 14                                            | 857                   | 1.6%                                           |
| Union       | 10                                            | 590                   | 1.7%                                           |
| Vermilion   | 9                                             | 1,049                 | 0.9%                                           |
| Wabash      | 1                                             | 208                   | 0.5%                                           |
| Warren      | 1                                             | 711                   | 0.1%                                           |
| Washington  | 10                                            | 715                   | 1.4%                                           |
| Wayne       | 6                                             | 1,025                 | 0.6%                                           |
| White       | 4                                             | 496                   | 0.8%                                           |
| Whiteside   | 6                                             | 959                   | 0.6%                                           |
| Will        | 6                                             | 801                   | 0.7%                                           |
| Williamson  | 6                                             | 610                   | 1.0%                                           |
| Winnebago   | 6                                             | 736                   | 0.8%                                           |
| Woodford    | 2                                             | 920                   | 0.2%                                           |

\*Counties not listed in the table have no farms reporting an agroforestry practice in 2017.

**Total number of Illinois farms with an agroforestry practice: 604    Total number of Illinois farms: 72,651**

**Percentage of Illinois farms with an agroforestry practice: 0.8%**

**Data Source: USDA NASS Census of Agriculture 2017**

**Maps and table created by USDA National Agroforestry Center**

# Agroforestry in Indiana based on the 2017 Census of Agriculture

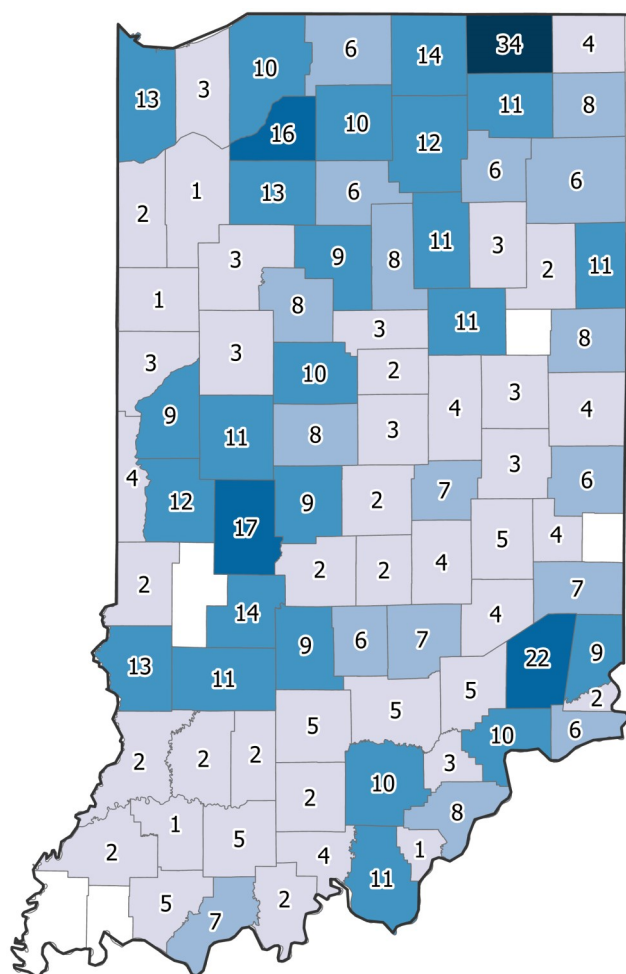

**Number of Indiana Farms Reporting an Agroforestry Practice in 2017**

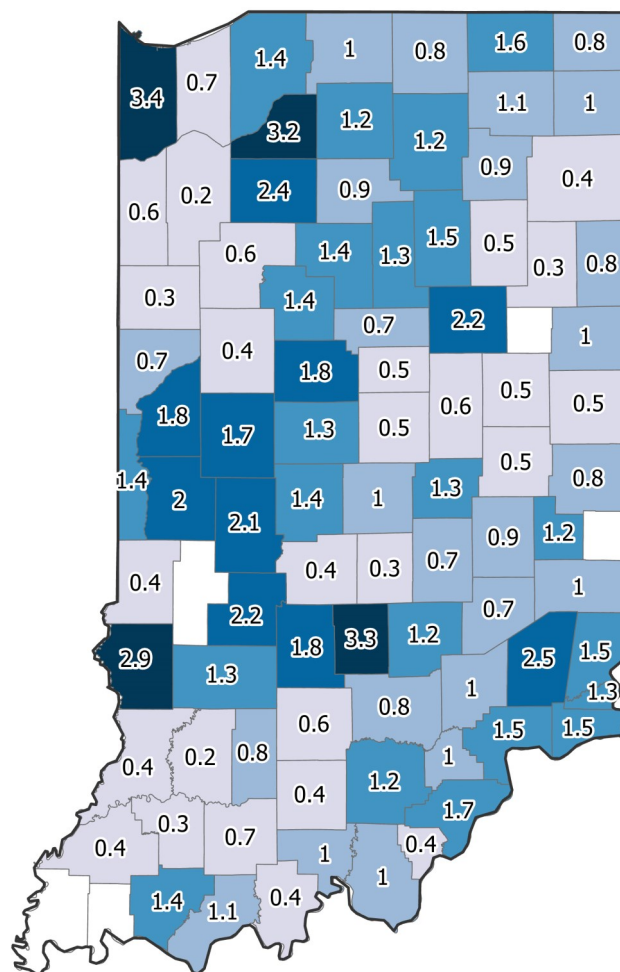

**Percentage of Indiana Farms Reporting an Agroforestry Practice in 2017**

| County*     | Number of Farms with an Agroforestry Practice | Total Number of Farms | Percent of Farms with an Agroforestry Practice |
|-------------|-----------------------------------------------|-----------------------|------------------------------------------------|
| Adams       | 11                                            | 1,450                 | 0.8%                                           |
| Allen       | 6                                             | 1,548                 | 0.4%                                           |
| Bartholomew | 7                                             | 564                   | 1.2%                                           |
| Benton      | 1                                             | 358                   | 0.3%                                           |
| Boone       | 8                                             | 626                   | 1.3%                                           |
| Brown       | 6                                             | 182                   | 3.3%                                           |
| Carroll     | 8                                             | 573                   | 1.4%                                           |
| Cass        | 9                                             | 642                   | 1.4%                                           |
| Clark       | 8                                             | 483                   | 1.7%                                           |
| Clinton     | 10                                            | 560                   | 1.8%                                           |

| County*  | Number of Farms with an Agroforestry Practice | Total Number of Farms | Percent of Farms with an Agroforestry Practice |
|----------|-----------------------------------------------|-----------------------|------------------------------------------------|
| Crawford | 4                                             | 391                   | 1.0%                                           |
| Daviess  | 2                                             | 1,230                 | 0.2%                                           |
| De Kalb  | 8                                             | 771                   | 1.0%                                           |
| Dearborn | 9                                             | 598                   | 1.5%                                           |
| Decatur  | 4                                             | 581                   | 0.7%                                           |
| Delaware | 3                                             | 546                   | 0.5%                                           |
| Dubois   | 5                                             | 757                   | 0.7%                                           |
| Elkhart  | 14                                            | 1,667                 | 0.8%                                           |
| Fayette  | 4                                             | 343                   | 1.2%                                           |
| Floyd    | 1                                             | 229                   | 0.4%                                           |

## Agroforestry in Indiana based on the 2017 Census of Agriculture

| County*    | Number of Farms with an Agroforestry Practice | Total Number of Farms | Percent of Farms with an Agroforestry Practice |
|------------|-----------------------------------------------|-----------------------|------------------------------------------------|
| Fountain   | 9                                             | 497                   | 1.8%                                           |
| Franklin   | 7                                             | 704                   | 1.0%                                           |
| Fulton     | 6                                             | 635                   | 0.9%                                           |
| Gibson     | 2                                             | 513                   | 0.4%                                           |
| Grant      | 11                                            | 494                   | 2.2%                                           |
| Greene     | 11                                            | 828                   | 1.3%                                           |
| Hamilton   | 3                                             | 585                   | 0.5%                                           |
| Hancock    | 7                                             | 551                   | 1.3%                                           |
| Harrison   | 11                                            | 1,054                 | 1.0%                                           |
| Hendricks  | 9                                             | 658                   | 1.4%                                           |
| Henry      | 3                                             | 636                   | 0.5%                                           |
| Howard     | 3                                             | 422                   | 0.7%                                           |
| Huntington | 3                                             | 611                   | 0.5%                                           |
| Jackson    | 5                                             | 665                   | 0.8%                                           |
| Jasper     | 1                                             | 611                   | 0.2%                                           |
| Jay        | 8                                             | 770                   | 1.0%                                           |
| Jefferson  | 10                                            | 684                   | 1.5%                                           |
| Jennings   | 5                                             | 510                   | 1.0%                                           |
| Johnson    | 2                                             | 642                   | 0.3%                                           |
| Knox       | 2                                             | 496                   | 0.4%                                           |
| Kosciusko  | 12                                            | 1,042                 | 1.2%                                           |
| La Porte   | 10                                            | 740                   | 1.4%                                           |
| Lagrange   | 34                                            | 2,144                 | 1.6%                                           |
| Lake       | 13                                            | 384                   | 3.4%                                           |
| Lawrence   | 5                                             | 840                   | 0.6%                                           |
| Madison    | 4                                             | 667                   | 0.6%                                           |
| Marion     | 2                                             | 192                   | 1.0%                                           |
| Marshall   | 10                                            | 829                   | 1.2%                                           |
| Martin     | 2                                             | 260                   | 0.8%                                           |
| Miami      | 8                                             | 629                   | 1.3%                                           |
| Monroe     | 9                                             | 490                   | 1.8%                                           |
| Montgomery | 11                                            | 634                   | 1.7%                                           |
| Morgan     | 2                                             | 501                   | 0.4%                                           |
| Newton     | 2                                             | 358                   | 0.6%                                           |

| County*     | Number of Farms with an Agroforestry Practice | Total Number of Farms | Percent of Farms with an Agroforestry Practice |
|-------------|-----------------------------------------------|-----------------------|------------------------------------------------|
| Noble       | 11                                            | 1,015                 | 1.1%                                           |
| Ohio        | 2                                             | 158                   | 1.3%                                           |
| Orange      | 2                                             | 448                   | 0.4%                                           |
| Owen        | 14                                            | 649                   | 2.2%                                           |
| Parke       | 12                                            | 597                   | 2.0%                                           |
| Perry       | 2                                             | 445                   | 0.4%                                           |
| Pike        | 1                                             | 327                   | 0.3%                                           |
| Porter      | 3                                             | 445                   | 0.7%                                           |
| Pulaski     | 13                                            | 547                   | 2.4%                                           |
| Putnam      | 17                                            | 828                   | 2.1%                                           |
| Randolph    | 4                                             | 754                   | 0.5%                                           |
| Ripley      | 22                                            | 879                   | 2.5%                                           |
| Rush        | 5                                             | 557                   | 0.9%                                           |
| Scott       | 3                                             | 315                   | 1.0%                                           |
| Shelby      | 4                                             | 567                   | 0.7%                                           |
| Spencer     | 7                                             | 665                   | 1.1%                                           |
| St. Joseph  | 6                                             | 629                   | 1.0%                                           |
| Starke      | 16                                            | 507                   | 3.2%                                           |
| Steuben     | 4                                             | 472                   | 0.8%                                           |
| Sullivan    | 13                                            | 450                   | 2.9%                                           |
| Switzerland | 6                                             | 410                   | 1.5%                                           |
| Tippecanoe  | 3                                             | 693                   | 0.4%                                           |
| Tipton      | 2                                             | 404                   | 0.5%                                           |
| Vermillion  | 4                                             | 283                   | 1.4%                                           |
| Vigo        | 2                                             | 477                   | 0.4%                                           |
| Wabash      | 11                                            | 724                   | 1.5%                                           |
| Warren      | 3                                             | 417                   | 0.7%                                           |
| Warrick     | 5                                             | 364                   | 1.4%                                           |
| Washington  | 10                                            | 865                   | 1.2%                                           |
| Wayne       | 6                                             | 768                   | 0.8%                                           |
| Wells       | 2                                             | 581                   | 0.3%                                           |
| White       | 3                                             | 539                   | 0.6%                                           |
| Whitley     | 6                                             | 696                   | 0.9%                                           |

\*Counties not listed in the table have no farms reporting an agroforestry practice in 2017.

**Total number of Indiana farms with an agroforestry practice: 594    Total number of Indiana farms: 56,649**

**Percentage of Indiana farms with an agroforestry practice: 1.0%**

**Data Source: USDA NASS Census of Agriculture 2017**

**Maps and table created by USDA National Agroforestry Center**

## Agroforestry in Iowa based on the 2017 Census of Agriculture

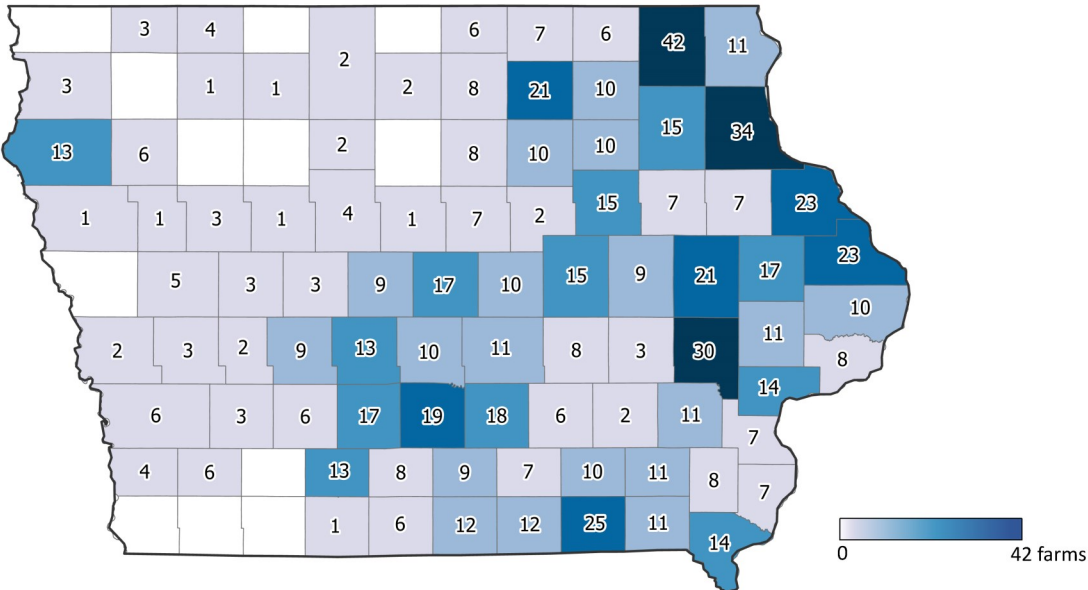

### Number of Iowa Farms Reporting an Agroforestry Practice in 2017

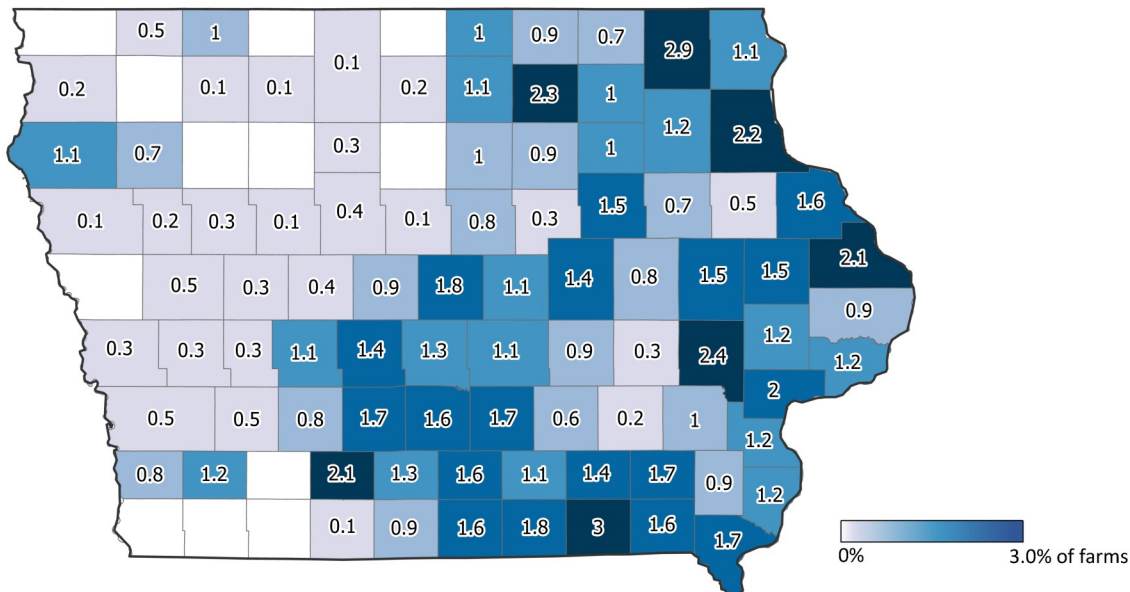

### Percentage of Iowa Farms Reporting an Agroforestry Practice in 2017

| County*    | Number of Farms with an Agroforestry Practice | Total Number of Farms | Percent of Farms with an Agroforestry Practice |
|------------|-----------------------------------------------|-----------------------|------------------------------------------------|
| Adair      | 6                                             | 738                   | 0.8%                                           |
| Allamakee  | 11                                            | 997                   | 1.1%                                           |
| Appanoose  | 12                                            | 675                   | 1.8%                                           |
| Audubon    | 2                                             | 628                   | 0.3%                                           |
| Benton     | 9                                             | 1,148                 | 0.8%                                           |
| Black Hawk | 15                                            | 968                   | 1.5%                                           |

| County*  | Number of Farms with an Agroforestry Practice | Total Number of Farms | Percent of Farms with an Agroforestry Practice |
|----------|-----------------------------------------------|-----------------------|------------------------------------------------|
| Boone    | 9                                             | 967                   | 0.9%                                           |
| Bremer   | 10                                            | 963                   | 1.0%                                           |
| Buchanan | 7                                             | 1,057                 | 0.7%                                           |
| Butler   | 10                                            | 1,074                 | 0.9%                                           |
| Calhoun  | 1                                             | 813                   | 0.1%                                           |
| Carroll  | 3                                             | 1,074                 | 0.3%                                           |

# Agroforestry in Iowa based on the 2017 Census of Agriculture

| County*     | Number of Farms with an Agroforestry Practice | Total Number of Farms | Percent of Farms with an Agroforestry Practice |
|-------------|-----------------------------------------------|-----------------------|------------------------------------------------|
| Cass        | 3                                             | 643                   | 0.5%                                           |
| Cedar       | 11                                            | 933                   | 1.2%                                           |
| Cerro Gordo | 8                                             | 760                   | 1.1%                                           |
| Cherokee    | 6                                             | 863                   | 0.7%                                           |
| Chickasaw   | 10                                            | 973                   | 1.0%                                           |
| Clarke      | 8                                             | 624                   | 1.3%                                           |
| Clay        | 1                                             | 716                   | 0.1%                                           |
| Clayton     | 34                                            | 1,525                 | 2.2%                                           |
| Clinton     | 10                                            | 1,169                 | 0.9%                                           |
| Crawford    | 5                                             | 915                   | 0.5%                                           |
| Dallas      | 13                                            | 924                   | 1.4%                                           |
| Davis       | 25                                            | 826                   | 3.0%                                           |
| Decatur     | 6                                             | 659                   | 0.9%                                           |
| Delaware    | 7                                             | 1,331                 | 0.5%                                           |
| Des Moines  | 7                                             | 593                   | 1.2%                                           |
| Dickinson   | 4                                             | 411                   | 1.0%                                           |
| Dubuque     | 23                                            | 1,402                 | 1.6%                                           |
| Fayette     | 15                                            | 1,265                 | 1.2%                                           |
| Floyd       | 21                                            | 917                   | 2.3%                                           |
| Franklin    | 8                                             | 835                   | 1.0%                                           |
| Greene      | 3                                             | 700                   | 0.4%                                           |
| Grundy      | 2                                             | 760                   | 0.3%                                           |
| Guthrie     | 9                                             | 802                   | 1.1%                                           |
| Hamilton    | 1                                             | 732                   | 0.1%                                           |
| Hancock     | 2                                             | 801                   | 0.2%                                           |
| Hardin      | 7                                             | 837                   | 0.8%                                           |
| Harrison    | 2                                             | 794                   | 0.3%                                           |
| Henry       | 8                                             | 908                   | 0.9%                                           |
| Howard      | 6                                             | 879                   | 0.7%                                           |
| Humboldt    | 2                                             | 572                   | 0.3%                                           |
| Ida         | 1                                             | 525                   | 0.2%                                           |
| Iowa        | 3                                             | 970                   | 0.3%                                           |
| Jackson     | 23                                            | 1,107                 | 2.1%                                           |
| Jasper      | 11                                            | 986                   | 1.1%                                           |
| Jefferson   | 11                                            | 636                   | 1.7%                                           |
| Johnson     | 30                                            | 1,257                 | 2.4%                                           |
| Jones       | 17                                            | 1,110                 | 1.5%                                           |
| Keokuk      | 2                                             | 927                   | 0.2%                                           |

| County*       | Number of Farms with an Agroforestry Practice | Total Number of Farms | Percent of Farms with an Agroforestry Practice |
|---------------|-----------------------------------------------|-----------------------|------------------------------------------------|
| Kossuth       | 2                                             | 1,347                 | 0.1%                                           |
| Lee           | 14                                            | 837                   | 1.7%                                           |
| Linn          | 21                                            | 1,374                 | 1.5%                                           |
| Louisa        | 7                                             | 576                   | 1.2%                                           |
| Lucas         | 9                                             | 567                   | 1.6%                                           |
| Madison       | 17                                            | 977                   | 1.7%                                           |
| Mahaska       | 6                                             | 943                   | 0.6%                                           |
| Marion        | 18                                            | 1,030                 | 1.7%                                           |
| Marshall      | 10                                            | 886                   | 1.1%                                           |
| Mills         | 4                                             | 520                   | 0.8%                                           |
| Mitchell      | 7                                             | 789                   | 0.9%                                           |
| Monroe        | 7                                             | 618                   | 1.1%                                           |
| Montgomery    | 6                                             | 516                   | 1.2%                                           |
| Muscatine     | 14                                            | 714                   | 2.0%                                           |
| Osceola       | 3                                             | 591                   | 0.5%                                           |
| Palo Alto     | 1                                             | 785                   | 0.1%                                           |
| Plymouth      | 13                                            | 1,219                 | 1.1%                                           |
| Polk          | 10                                            | 755                   | 1.3%                                           |
| Pottawattamie | 6                                             | 1,114                 | 0.5%                                           |
| Poweshiek     | 8                                             | 852                   | 0.9%                                           |
| Ringgold      | 1                                             | 675                   | 0.1%                                           |
| Sac           | 3                                             | 889                   | 0.3%                                           |
| Scott         | 8                                             | 684                   | 1.2%                                           |
| Shelby        | 3                                             | 890                   | 0.3%                                           |
| Sioux         | 3                                             | 1,724                 | 0.2%                                           |
| Story         | 17                                            | 955                   | 1.8%                                           |
| Tama          | 15                                            | 1,072                 | 1.4%                                           |
| Union         | 13                                            | 627                   | 2.1%                                           |
| Van Buren     | 11                                            | 690                   | 1.6%                                           |
| Wapello       | 10                                            | 715                   | 1.4%                                           |
| Warren        | 19                                            | 1,214                 | 1.6%                                           |
| Washington    | 11                                            | 1,129                 | 1.0%                                           |
| Wayne         | 12                                            | 743                   | 1.6%                                           |
| Webster       | 4                                             | 960                   | 0.4%                                           |
| Winneshiek    | 42                                            | 1,458                 | 2.9%                                           |
| Woodbury      | 1                                             | 1,037                 | 0.1%                                           |
| Worth         | 6                                             | 582                   | 1.0%                                           |

\*Counties not listed in the table have no farms reporting an agroforestry practice in 2017.

**Total number of Iowa farms with an agroforestry practice: 822    Total number of Iowa farms: 86,104**

**Percentage of Iowa farms with an agroforestry practice: 1.0%**

**Data Source: USDA NASS Census of Agriculture 2017**

**Maps and table created by USDA National Agroforestry Center**

# Agroforestry in Kansas based on the 2017 Census of Agriculture

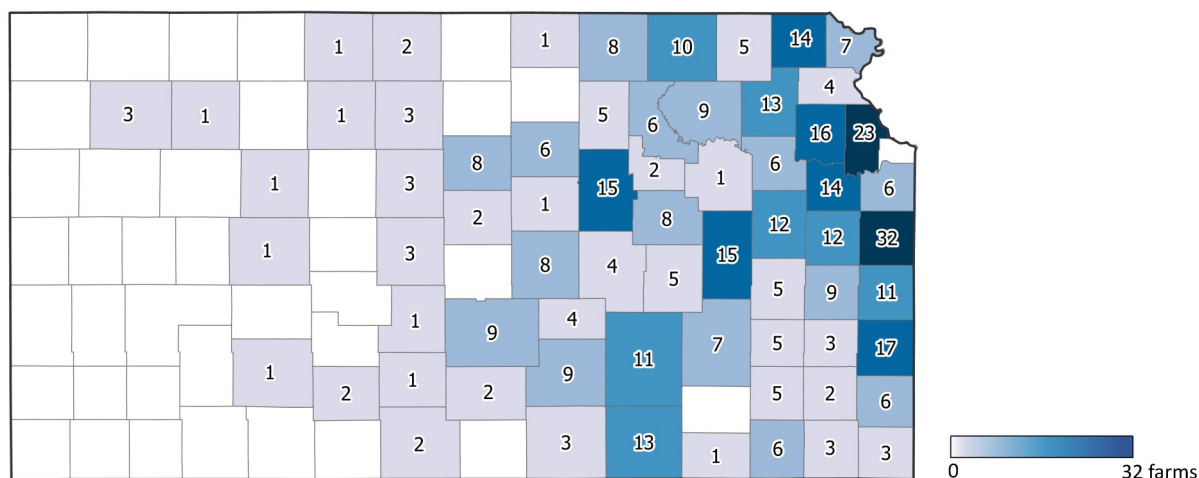

**Number of Kansas Farms Reporting an Agroforestry Practice in 2017**

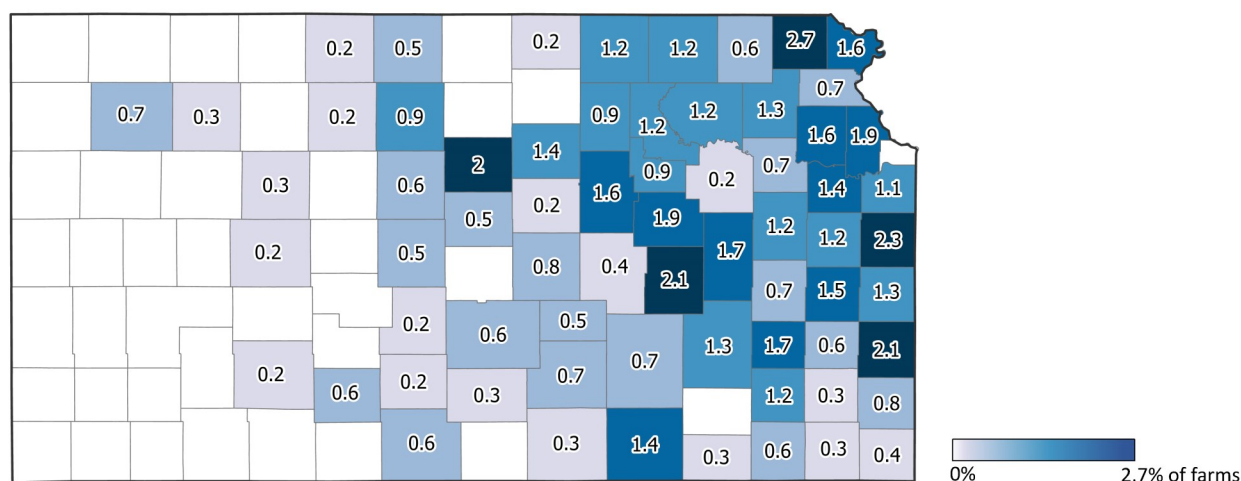

**Percentage of Kansas Farms Reporting an Agroforestry Practice in 2017**

| County*  | Number of Farms with an Agroforestry Practice | Total Number of Farms | Percent of Farms with an Agroforestry Practice |
|----------|-----------------------------------------------|-----------------------|------------------------------------------------|
| Allen    | 3                                             | 505                   | 0.6%                                           |
| Anderson | 9                                             | 611                   | 1.5%                                           |
| Atchison | 4                                             | 595                   | 0.7%                                           |
| Barber   | 2                                             | 362                   | 0.6%                                           |
| Barton   | 3                                             | 628                   | 0.5%                                           |
| Bourbon  | 17                                            | 813                   | 2.1%                                           |
| Brown    | 14                                            | 510                   | 2.7%                                           |
| Butler   | 11                                            | 1,471                 | 0.7%                                           |
| Chase    | 5                                             | 238                   | 2.1%                                           |

| County*    | Number of Farms with an Agroforestry Practice | Total Number of Farms | Percent of Farms with an Agroforestry Practice |
|------------|-----------------------------------------------|-----------------------|------------------------------------------------|
| Chautauqua | 1                                             | 351                   | 0.3%                                           |
| Cherokee   | 3                                             | 756                   | 0.4%                                           |
| Clay       | 5                                             | 547                   | 0.9%                                           |
| Coffey     | 5                                             | 699                   | 0.7%                                           |
| Cowley     | 13                                            | 921                   | 1.4%                                           |
| Crawford   | 6                                             | 777                   | 0.8%                                           |
| Dickinson  | 15                                            | 919                   | 1.6%                                           |
| Doniphan   | 7                                             | 430                   | 1.6%                                           |
| Douglas    | 14                                            | 998                   | 1.4%                                           |

# Agroforestry in Kansas based on the 2017 Census of Agriculture

| County*     | Number of Farms with an Agroforestry Practice | Total Number of Farms | Percent of Farms with an Agroforestry Practice |
|-------------|-----------------------------------------------|-----------------------|------------------------------------------------|
| Ellsworth   | 2                                             | 384                   | 0.5%                                           |
| Ford        | 1                                             | 505                   | 0.2%                                           |
| Franklin    | 12                                            | 1,020                 | 1.2%                                           |
| Geary       | 2                                             | 213                   | 0.9%                                           |
| Greenwood   | 7                                             | 540                   | 1.3%                                           |
| Harvey      | 4                                             | 752                   | 0.5%                                           |
| Jackson     | 13                                            | 972                   | 1.3%                                           |
| Jefferson   | 16                                            | 1,012                 | 1.6%                                           |
| Johnson     | 6                                             | 564                   | 1.1%                                           |
| Kingman     | 2                                             | 740                   | 0.3%                                           |
| Kiowa       | 2                                             | 359                   | 0.6%                                           |
| Labette     | 3                                             | 997                   | 0.3%                                           |
| Leavenworth | 23                                            | 1,213                 | 1.9%                                           |
| Lincoln     | 8                                             | 392                   | 2.0%                                           |
| Linn        | 11                                            | 864                   | 1.3%                                           |
| Lyon        | 15                                            | 867                   | 1.7%                                           |
| Marion      | 4                                             | 892                   | 0.4%                                           |
| Marshall    | 10                                            | 802                   | 1.2%                                           |
| McPherson   | 8                                             | 988                   | 0.8%                                           |
| Miami       | 32                                            | 1,400                 | 2.3%                                           |
| Montgomery  | 6                                             | 1,006                 | 0.6%                                           |
| Morris      | 8                                             | 430                   | 1.9%                                           |
| Nemaha      | 5                                             | 809                   | 0.6%                                           |
| Neosho      | 2                                             | 687                   | 0.3%                                           |
| Ness        | 1                                             | 523                   | 0.2%                                           |

| County*      | Number of Farms with an Agroforestry Practice | Total Number of Farms | Percent of Farms with an Agroforestry Practice |
|--------------|-----------------------------------------------|-----------------------|------------------------------------------------|
| Osage        | 12                                            | 1,042                 | 1.2%                                           |
| Osborne      | 3                                             | 319                   | 0.9%                                           |
| Ottawa       | 6                                             | 438                   | 1.4%                                           |
| Phillips     | 1                                             | 415                   | 0.2%                                           |
| Pottawatomie | 9                                             | 774                   | 1.2%                                           |
| Pratt        | 1                                             | 481                   | 0.2%                                           |
| Reno         | 9                                             | 1,552                 | 0.6%                                           |
| Republic     | 1                                             | 561                   | 0.2%                                           |
| Riley        | 6                                             | 504                   | 1.2%                                           |
| Rooks        | 1                                             | 412                   | 0.2%                                           |
| Russell      | 3                                             | 500                   | 0.6%                                           |
| Saline       | 1                                             | 609                   | 0.2%                                           |
| Sedgwick     | 9                                             | 1,360                 | 0.7%                                           |
| Shawnee      | 6                                             | 847                   | 0.7%                                           |
| Sheridan     | 1                                             | 318                   | 0.3%                                           |
| Smith        | 2                                             | 425                   | 0.5%                                           |
| Stafford     | 1                                             | 466                   | 0.2%                                           |
| Sumner       | 3                                             | 953                   | 0.3%                                           |
| Thomas       | 3                                             | 402                   | 0.7%                                           |
| Trego        | 1                                             | 343                   | 0.3%                                           |
| Wabaunsee    | 1                                             | 638                   | 0.2%                                           |
| Washington   | 8                                             | 694                   | 1.2%                                           |
| Wilson       | 5                                             | 420                   | 1.2%                                           |
| Woodson      | 5                                             | 289                   | 1.7%                                           |

\*Counties not listed in the table have no farms reporting an agroforestry practice in 2017.

Total number of Kansas farms with an agroforestry practice: 438 Total number of Kansas farms: 58,569

Percentage of Kansas farms with an agroforestry practice: 0.7%

Data Source: USDA NASS Census of Agriculture 2017

Maps and table created by USDA National Agroforestry Center

# Agroforestry in Kentucky based on the 2017 Census of Agriculture

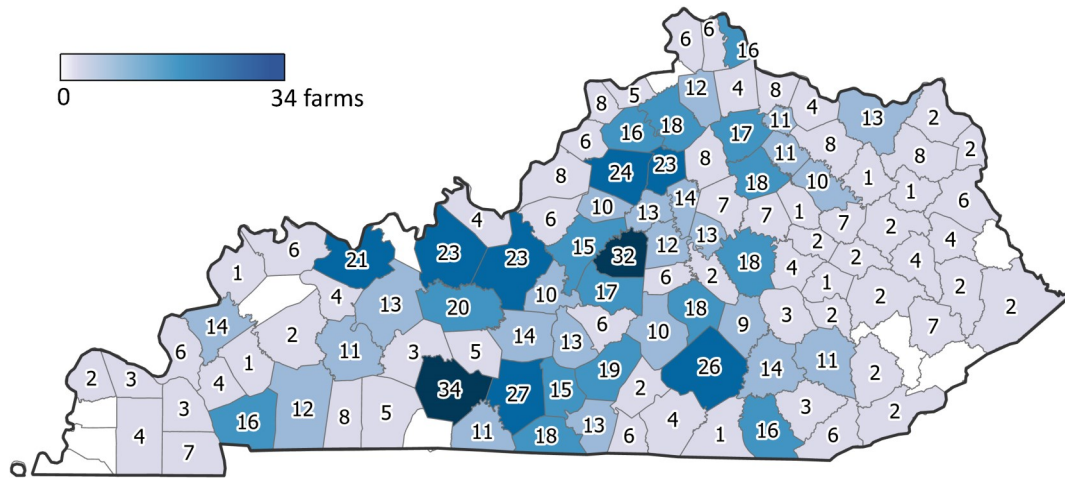

**Number of Kentucky Farms Reporting an Agroforestry Practice in 2017**

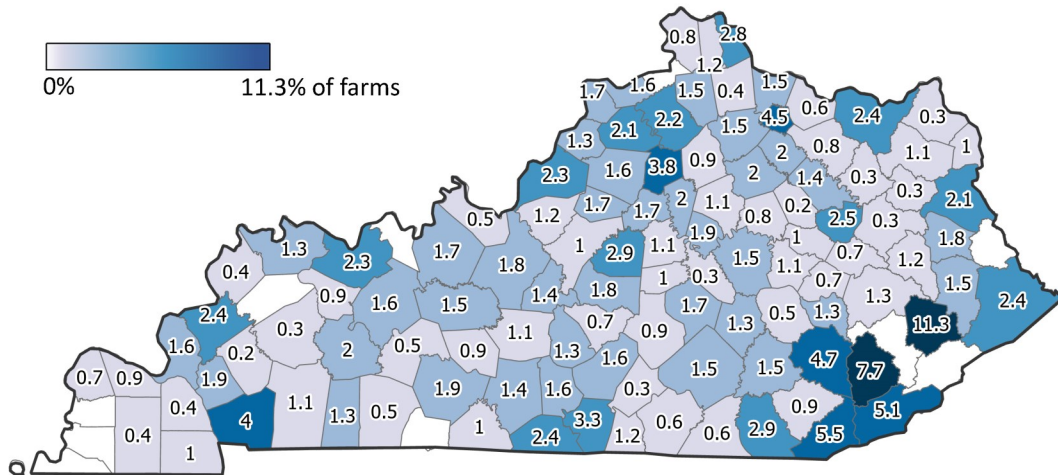

**Percentage of Kentucky Farms Reporting an Agroforestry Practice in 2017**

| County*  | Number of Farms with an Agroforestry Practice | Total Number of Farms | Percent of Farms with an Agroforestry Practice |
|----------|-----------------------------------------------|-----------------------|------------------------------------------------|
| Adair    | 19                                            | 1,154                 | 1.6%                                           |
| Allen    | 11                                            | 1,127                 | 1.0%                                           |
| Anderson | 13                                            | 774                   | 1.7%                                           |
| Ballard  | 2                                             | 295                   | 0.7%                                           |
| Barren   | 27                                            | 1,899                 | 1.4%                                           |
| Bath     | 10                                            | 728                   | 1.4%                                           |
| Bell     | 6                                             | 110                   | 5.5%                                           |
| Boone    | 6                                             | 721                   | 0.8%                                           |
| Bourbon  | 18                                            | 915                   | 2.0%                                           |

| County*      | Number of Farms with an Agroforestry Practice | Total Number of Farms | Percent of Farms with an Agroforestry Practice |
|--------------|-----------------------------------------------|-----------------------|------------------------------------------------|
| Boyd         | 2                                             | 203                   | 1.0%                                           |
| Boyle        | 6                                             | 602                   | 1.0%                                           |
| Bracken      | 8                                             | 531                   | 1.5%                                           |
| Breathitt    | 2                                             | 160                   | 1.3%                                           |
| Breckinridge | 23                                            | 1,357                 | 1.7%                                           |
| Bullitt      | 6                                             | 486                   | 1.2%                                           |
| Butler       | 3                                             | 642                   | 0.5%                                           |
| Caldwell     | 1                                             | 475                   | 0.2%                                           |
| Calloway     | 7                                             | 710                   | 1.0%                                           |

## Agroforestry in Kentucky based on the 2017 Census of Agriculture

| County*    | Number of Farms with an Agroforestry Practice | Total Number of Farms | Percent of Farms with an Agroforestry Practice |
|------------|-----------------------------------------------|-----------------------|------------------------------------------------|
| Campbell   | 16                                            | 577                   | 2.8%                                           |
| Carroll    | 5                                             | 308                   | 1.6%                                           |
| Carter     | 8                                             | 718                   | 1.1%                                           |
| Casey      | 10                                            | 1,106                 | 0.9%                                           |
| Christian  | 12                                            | 1,137                 | 1.1%                                           |
| Clark      | 7                                             | 871                   | 0.8%                                           |
| Clay       | 11                                            | 233                   | 4.7%                                           |
| Clinton    | 6                                             | 512                   | 1.2%                                           |
| Crittenden | 14                                            | 575                   | 2.4%                                           |
| Cumberland | 13                                            | 395                   | 3.3%                                           |
| Daviess    | 21                                            | 919                   | 2.3%                                           |
| Edmonson   | 5                                             | 578                   | 0.9%                                           |
| Elliott    | 1                                             | 363                   | 0.3%                                           |
| Estill     | 4                                             | 367                   | 1.1%                                           |
| Fayette    | 7                                             | 622                   | 1.1%                                           |
| Fleming    | 8                                             | 1,013                 | 0.8%                                           |
| Floyd      | 2                                             | 136                   | 1.5%                                           |
| Franklin   | 23                                            | 599                   | 3.8%                                           |
| Garrard    | 2                                             | 793                   | 0.3%                                           |
| Grant      | 12                                            | 811                   | 1.5%                                           |
| Graves     | 4                                             | 1,104                 | 0.4%                                           |
| Grayson    | 20                                            | 1,339                 | 1.5%                                           |
| Green      | 13                                            | 1,004                 | 1.3%                                           |
| Greenup    | 2                                             | 584                   | 0.3%                                           |
| Hardin     | 23                                            | 1,305                 | 1.8%                                           |
| Harlan     | 2                                             | 39                    | 5.1%                                           |
| Harrison   | 17                                            | 1,138                 | 1.5%                                           |
| Hart       | 14                                            | 1,287                 | 1.1%                                           |
| Henderson  | 6                                             | 458                   | 1.3%                                           |
| Henry      | 16                                            | 771                   | 2.1%                                           |
| Hopkins    | 2                                             | 656                   | 0.3%                                           |
| Jackson    | 3                                             | 551                   | 0.5%                                           |
| Jefferson  | 8                                             | 343                   | 2.3%                                           |
| Jessamine  | 13                                            | 671                   | 1.9%                                           |
| Johnson    | 4                                             | 224                   | 1.8%                                           |
| Kenton     | 6                                             | 506                   | 1.2%                                           |
| Knott      | 7                                             | 62                    | 11.3%                                          |
| Knox       | 3                                             | 336                   | 0.9%                                           |
| Larue      | 10                                            | 718                   | 1.4%                                           |
| Laurel     | 14                                            | 955                   | 1.5%                                           |
| Lawrence   | 6                                             | 284                   | 2.1%                                           |
| Lee        | 1                                             | 144                   | 0.7%                                           |
| Leslie     | 2                                             | 26                    | 7.7%                                           |

| County*    | Number of Farms with an Agroforestry Practice | Total Number of Farms | Percent of Farms with an Agroforestry Practice |
|------------|-----------------------------------------------|-----------------------|------------------------------------------------|
| Lewis      | 13                                            | 550                   | 2.4%                                           |
| Lincoln    | 18                                            | 1,090                 | 1.7%                                           |
| Livingston | 6                                             | 365                   | 1.6%                                           |
| Logan      | 5                                             | 1,078                 | 0.5%                                           |
| Lyon       | 4                                             | 208                   | 1.9%                                           |
| Madison    | 18                                            | 1,187                 | 1.5%                                           |
| Magoffin   | 4                                             | 335                   | 1.2%                                           |
| Marion     | 17                                            | 954                   | 1.8%                                           |
| Marshall   | 3                                             | 699                   | 0.4%                                           |
| Mason      | 4                                             | 680                   | 0.6%                                           |
| McCracken  | 3                                             | 318                   | 0.9%                                           |
| McCreary   | 1                                             | 173                   | 0.6%                                           |
| McLean     | 4                                             | 439                   | 0.9%                                           |
| Meade      | 4                                             | 781                   | 0.5%                                           |
| Menifee    | 7                                             | 283                   | 2.5%                                           |
| Mercer     | 12                                            | 1,108                 | 1.1%                                           |
| Metcalfe   | 15                                            | 945                   | 1.6%                                           |
| Monroe     | 18                                            | 765                   | 2.4%                                           |
| Montgomery | 1                                             | 659                   | 0.2%                                           |
| Morgan     | 2                                             | 657                   | 0.3%                                           |
| Muhlenberg | 11                                            | 549                   | 2.0%                                           |
| Nelson     | 15                                            | 1,434                 | 1.0%                                           |
| Nicholas   | 11                                            | 556                   | 2.0%                                           |
| Ohio       | 13                                            | 813                   | 1.6%                                           |
| Oldham     | 6                                             | 466                   | 1.3%                                           |
| Owen       | 18                                            | 821                   | 2.2%                                           |
| Owsley     | 2                                             | 153                   | 1.3%                                           |
| Pendleton  | 4                                             | 919                   | 0.4%                                           |
| Pike       | 2                                             | 85                    | 2.4%                                           |
| Powell     | 2                                             | 194                   | 1.0%                                           |
| Pulaski    | 26                                            | 1,704                 | 1.5%                                           |
| Robertson  | 11                                            | 245                   | 4.5%                                           |
| Rockcastle | 9                                             | 681                   | 1.3%                                           |
| Rowan      | 1                                             | 329                   | 0.3%                                           |
| Russell    | 2                                             | 672                   | 0.3%                                           |
| Scott      | 8                                             | 851                   | 0.9%                                           |
| Shelby     | 24                                            | 1,548                 | 1.6%                                           |
| Spencer    | 10                                            | 606                   | 1.7%                                           |
| Taylor     | 6                                             | 803                   | 0.7%                                           |
| Todd       | 8                                             | 593                   | 1.3%                                           |
| Trigg      | 16                                            | 405                   | 4.0%                                           |
| Trimble    | 8                                             | 469                   | 1.7%                                           |
| Union      | 1                                             | 284                   | 0.4%                                           |

## Agroforestry in Kentucky based on the 2017 Census of Agriculture

| County*    | Number of Farms with an Agroforestry Practice | Total Number of Farms | Percent of Farms with an Agroforestry Practice |
|------------|-----------------------------------------------|-----------------------|------------------------------------------------|
| Warren     | 34                                            | 1,755                 | 1.9%                                           |
| Washington | 32                                            | 1,102                 | 2.9%                                           |
| Wayne      | 4                                             | 710                   | 0.6%                                           |

| County*  | Number of Farms with an Agroforestry Practice | Total Number of Farms | Percent of Farms with an Agroforestry Practice |
|----------|-----------------------------------------------|-----------------------|------------------------------------------------|
| Whitley  | 16                                            | 548                   | 2.9%                                           |
| Wolfe    | 2                                             | 294                   | 0.7%                                           |
| Woodford | 14                                            | 689                   | 2.0%                                           |

\*Counties not listed in the table have no farms reporting an agroforestry practice in 2017.

Total number of Kentucky farms with an agroforestry practice: 1,028 Total number of Kentucky farms: 75,966

Percentage of Kentucky farms with an agroforestry practice: 1.4%

Data Source: USDA NASS Census of Agriculture 2017

Maps and table created by USDA National Agroforestry Center

# Agroforestry in Louisiana based on the 2017 Census of Agriculture

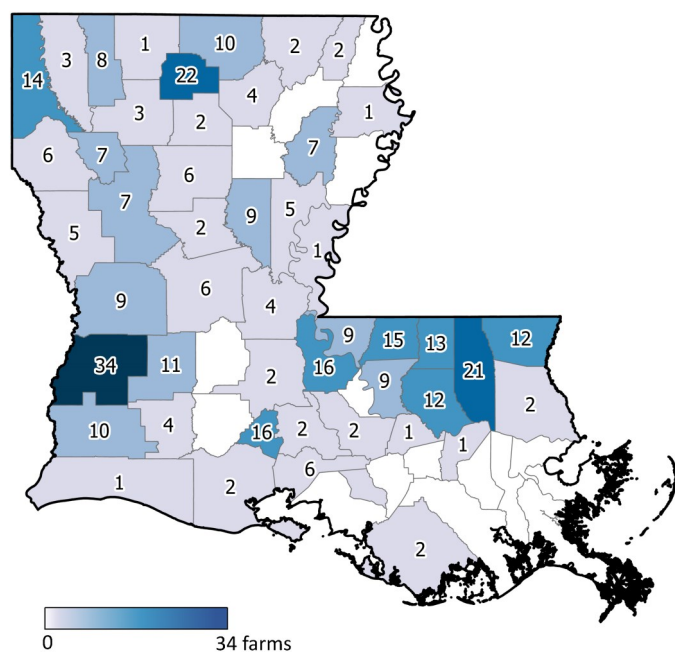

**Number of Louisiana Farms Reporting an Agroforestry Practice in 2017**

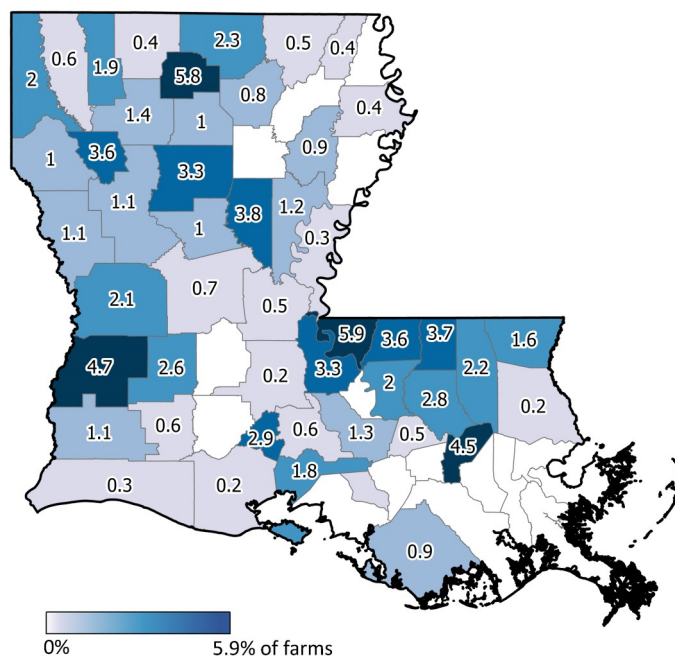

**Percentage of Louisiana Farms Reporting an Agroforestry Practice in 2017**

| County*          | Number of Farms with an Agroforestry Practice | Total Number of Farms | Percent of Farms with an Agroforestry Practice |
|------------------|-----------------------------------------------|-----------------------|------------------------------------------------|
| Allen            | 11                                            | 420                   | 2.6%                                           |
| Ascension        | 1                                             | 221                   | 0.5%                                           |
| Avoyelles        | 4                                             | 770                   | 0.5%                                           |
| Beauregard       | 34                                            | 730                   | 4.7%                                           |
| Bienville        | 3                                             | 221                   | 1.4%                                           |
| Bossier          | 3                                             | 519                   | 0.6%                                           |
| Caddo            | 14                                            | 706                   | 2.0%                                           |
| Calcasieu        | 10                                            | 931                   | 1.1%                                           |
| Cameron          | 1                                             | 294                   | 0.3%                                           |
| Catahoula        | 5                                             | 433                   | 1.2%                                           |
| Claiborne        | 1                                             | 255                   | 0.4%                                           |
| Concordia        | 1                                             | 371                   | 0.3%                                           |
| De Soto          | 6                                             | 599                   | 1.0%                                           |
| East Baton Rouge | 9                                             | 449                   | 2.0%                                           |
| East Feliciana   | 15                                            | 412                   | 3.6%                                           |
| Franklin         | 7                                             | 797                   | 0.9%                                           |
| Grant            | 2                                             | 207                   | 1.0%                                           |
| Iberia           | 6                                             | 334                   | 1.8%                                           |
| Iberville        | 2                                             | 151                   | 1.3%                                           |
| Jackson          | 2                                             | 191                   | 1.0%                                           |

| County*              | Number of Farms with an Agroforestry Practice | Total Number of Farms | Percent of Farms with an Agroforestry Practice |
|----------------------|-----------------------------------------------|-----------------------|------------------------------------------------|
| Jefferson Davis      | 4                                             | 703                   | 0.6%                                           |
| La Salle             | 9                                             | 235                   | 3.8%                                           |
| Lafayette            | 16                                            | 549                   | 2.9%                                           |
| Lincoln              | 22                                            | 378                   | 5.8%                                           |
| Livingston           | 12                                            | 436                   | 2.8%                                           |
| Madison              | 1                                             | 250                   | 0.4%                                           |
| Morehouse            | 2                                             | 409                   | 0.5%                                           |
| Natchitoches         | 7                                             | 627                   | 1.1%                                           |
| Ouachita             | 4                                             | 488                   | 0.8%                                           |
| Pointe Coupee        | 16                                            | 482                   | 3.3%                                           |
| Rapides              | 6                                             | 856                   | 0.7%                                           |
| Red River            | 7                                             | 197                   | 3.6%                                           |
| Sabine               | 5                                             | 442                   | 1.1%                                           |
| St. Helena           | 13                                            | 348                   | 3.7%                                           |
| St. John the Baptist | 1                                             | 22                    | 4.5%                                           |
| St. Landry           | 2                                             | 1,200                 | 0.2%                                           |
| St. Martin           | 2                                             | 360                   | 0.6%                                           |
| St. Tammany          | 2                                             | 994                   | 0.2%                                           |
| Tangipahoa           | 21                                            | 967                   | 2.2%                                           |
| Terrebonne           | 2                                             | 213                   | 0.9%                                           |

## Agroforestry in Louisiana based on the 2017 Census of Agriculture

| County*    | Number of<br>Farms with an<br>Agroforestry<br>Practice | Total<br>Number<br>of Farms | Percent of<br>Farms with an<br>Agroforestry<br>Practice |
|------------|--------------------------------------------------------|-----------------------------|---------------------------------------------------------|
| Union      | 10                                                     | 426                         | 2.3%                                                    |
| Vermilion  | 2                                                      | 1,304                       | 0.2%                                                    |
| Vernon     | 9                                                      | 432                         | 2.1%                                                    |
| Washington | 12                                                     | 735                         | 1.6%                                                    |

| County*        | Number of<br>Farms with an<br>Agroforestry<br>Practice | Total<br>Number<br>of Farms | Percent of<br>Farms with an<br>Agroforestry<br>Practice |
|----------------|--------------------------------------------------------|-----------------------------|---------------------------------------------------------|
| Webster        | 8                                                      | 431                         | 1.9%                                                    |
| West Carroll   | 2                                                      | 548                         | 0.4%                                                    |
| West Feliciana | 9                                                      | 153                         | 5.9%                                                    |
| Winn           | 6                                                      | 184                         | 3.3%                                                    |

\*Counties not listed in the table have no farms reporting an agroforestry practice in 2017.

Total number of Louisiana farms with an agroforestry practice: 349    Total number of Louisiana farms: 27,386

Percentage of Louisiana farms with an agroforestry practice: 1.3%

Data Source: USDA NASS Census of Agriculture 2017

Maps and table created by USDA National Agroforestry Center

# Agroforestry in Maine based on the 2017 Census of Agriculture

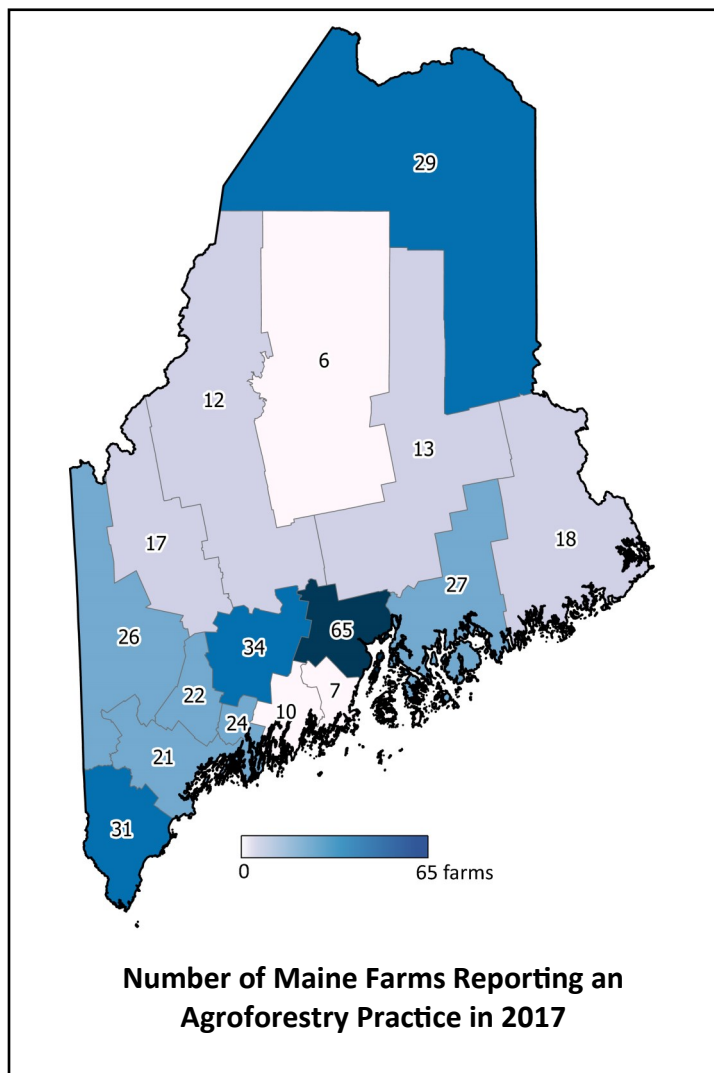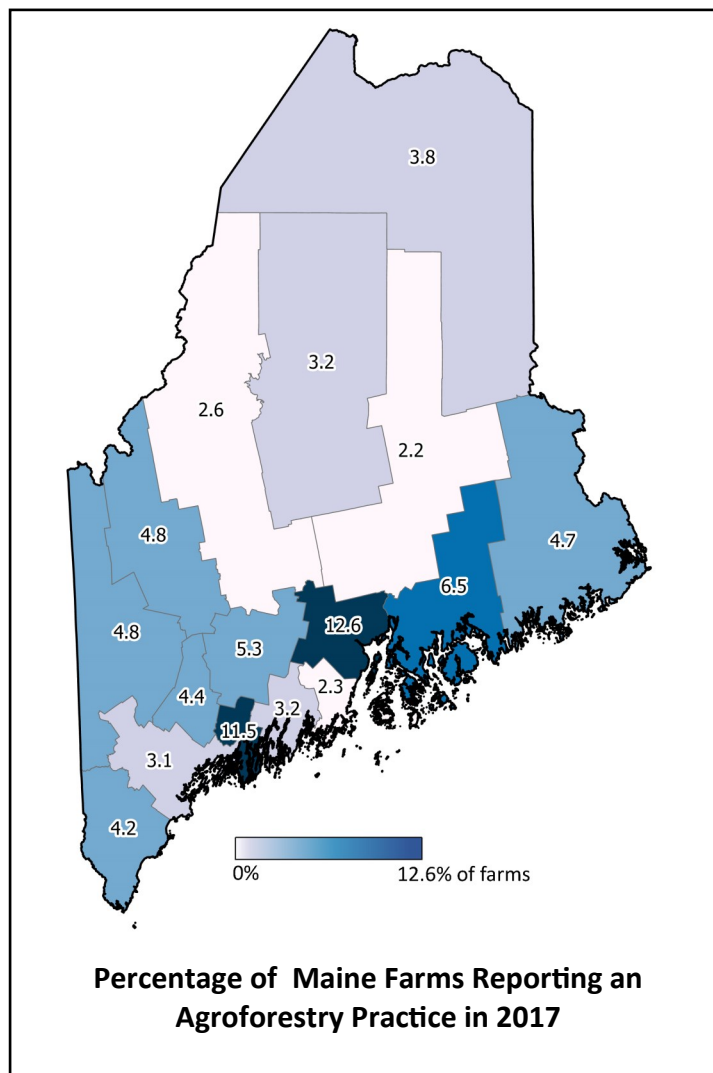

| County       | Number of Farms with an Agroforestry Practice | Total Number of Farms | Percent of Farms with an Agroforestry Practice |
|--------------|-----------------------------------------------|-----------------------|------------------------------------------------|
| Androscoggin | 22                                            | 496                   | 4.4%                                           |
| Aroostook    | 29                                            | 766                   | 3.8%                                           |
| Cumberland   | 21                                            | 668                   | 3.1%                                           |
| Franklin     | 17                                            | 354                   | 4.8%                                           |
| Hancock      | 27                                            | 416                   | 6.5%                                           |
| Kennebec     | 34                                            | 642                   | 5.3%                                           |
| Knox         | 7                                             | 308                   | 2.3%                                           |
| Lincoln      | 10                                            | 309                   | 3.2%                                           |

| County      | Number of Farms with an Agroforestry Practice | Total Number of Farms | Percent of Farms with an Agroforestry Practice |
|-------------|-----------------------------------------------|-----------------------|------------------------------------------------|
| Oxford      | 26                                            | 545                   | 4.8%                                           |
| Penobscot   | 13                                            | 601                   | 2.2%                                           |
| Piscataquis | 6                                             | 188                   | 3.2%                                           |
| Sagadahoc   | 24                                            | 209                   | 11.5%                                          |
| Somerset    | 12                                            | 467                   | 2.6%                                           |
| Waldo       | 65                                            | 517                   | 12.6%                                          |
| Washington  | 18                                            | 379                   | 4.7%                                           |
| York        | 31                                            | 735                   | 4.2%                                           |

Total number of Maine farms with an agroforestry practice: 362 Total number of Maine farms: 7,600

Percentage of Maine farms with an agroforestry practice: 4.8%

Data Source: USDA NASS Census of Agriculture 2017

Maps and table created by USDA National Agroforestry Center

# Agroforestry in Maryland based on the 2017 Census of Agriculture

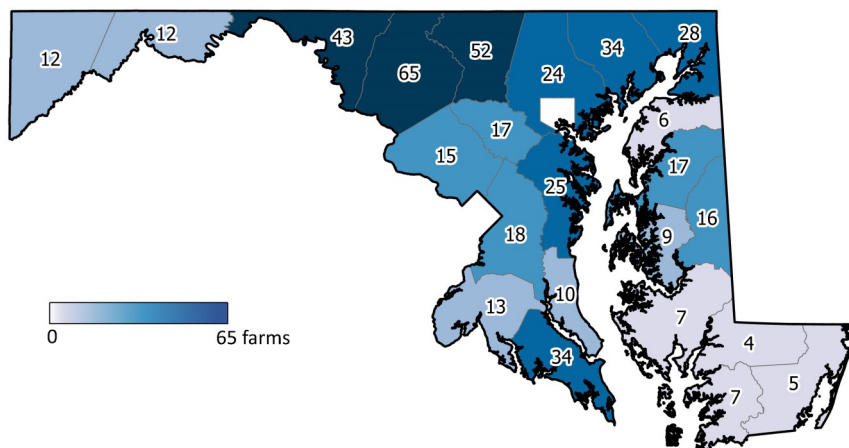

**Number of Maryland Farms Reporting an Agroforestry Practice in 2017**

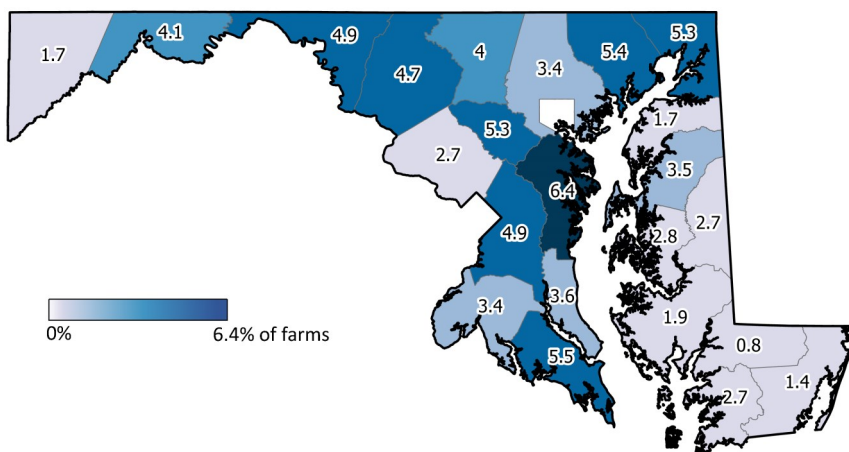

**Percentage of Maryland Farms Reporting an Agroforestry Practice in 2017**

| County       | Number of Farms with an Agroforestry Practice | Total Number of Farms | Percent of Farms with an Agroforestry Practice |
|--------------|-----------------------------------------------|-----------------------|------------------------------------------------|
| Allegany     | 12                                            | 290                   | 4.1%                                           |
| Anne Arundel | 25                                            | 390                   | 6.4%                                           |
| Baltimore    | 24                                            | 708                   | 3.4%                                           |
| Calvert      | 10                                            | 280                   | 3.6%                                           |
| Caroline     | 16                                            | 588                   | 2.7%                                           |
| Carroll      | 52                                            | 1,174                 | 4.4%                                           |
| Cecil        | 28                                            | 533                   | 5.3%                                           |
| Charles      | 13                                            | 385                   | 3.4%                                           |
| Dorchester   | 7                                             | 371                   | 1.9%                                           |
| Frederick    | 65                                            | 1373                  | 4.7%                                           |
| Garrett      | 12                                            | 707                   | 1.7%                                           |
| Harford      | 34                                            | 628                   | 5.4%                                           |

| County          | Number of Farms with an Agroforestry Practice | Total Number of Farms | Percent of Farms with an Agroforestry Practice |
|-----------------|-----------------------------------------------|-----------------------|------------------------------------------------|
| Howard          | 17                                            | 321                   | 5.3%                                           |
| Kent            | 6                                             | 346                   | 1.7%                                           |
| Montgomery      | 15                                            | 558                   | 2.7%                                           |
| Prince George's | 18                                            | 367                   | 4.9%                                           |
| Queen Anne's    | 17                                            | 483                   | 3.5%                                           |
| St. Mary's      | 34                                            | 615                   | 5.5%                                           |
| Somerset        | 7                                             | 255                   | 2.7%                                           |
| Talbot          | 9                                             | 317                   | 2.8%                                           |
| Washington      | 43                                            | 877                   | 4.9%                                           |
| Wicomico        | 4                                             | 494                   | 0.8%                                           |
| Worcester       | 5                                             | 369                   | 1.4%                                           |

Total number of Maryland farms with an agroforestry practice: 473 Total number of Maryland farms: 12,429

Percentage of Maryland farms with an agroforestry practice: 3.8%

Data Source: USDA NASS Census of Agriculture 2017

Maps and table created by USDA National Agroforestry Center

# Agroforestry in Massachusetts based on the 2017 Census of Agriculture

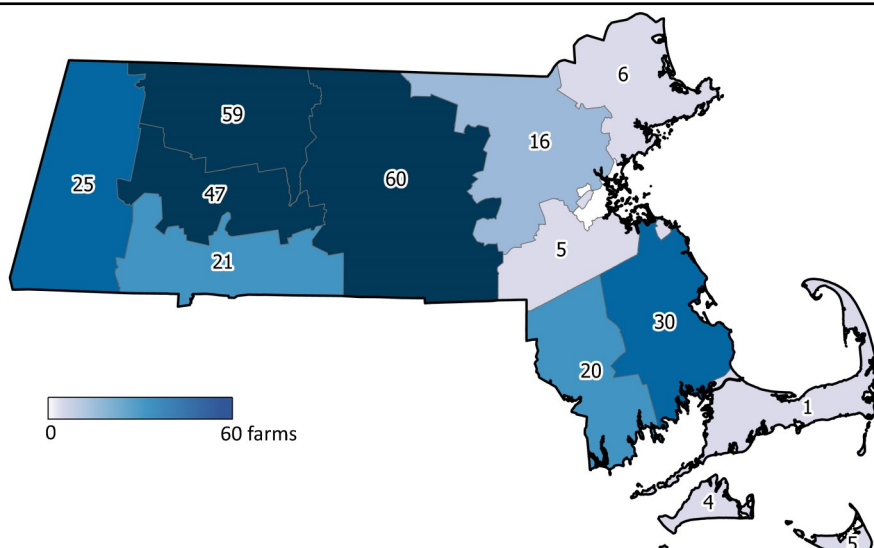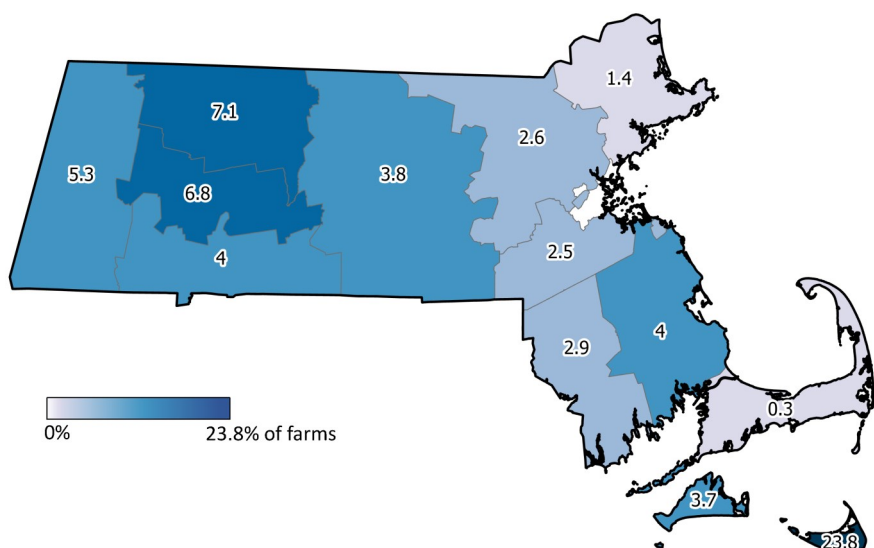

| County*           | Number of Farms with an Agroforestry Practice | Total Number of Farms | Percent of Farms with an Agroforestry Practice |
|-------------------|-----------------------------------------------|-----------------------|------------------------------------------------|
| Barnstable County | 1                                             | 321                   | 0.3%                                           |
| Berkshire County  | 25                                            | 475                   | 5.3%                                           |
| Bristol County    | 20                                            | 688                   | 2.9%                                           |
| Dukes County      | 4                                             | 108                   | 3.7%                                           |
| Essex County      | 6                                             | 419                   | 1.4%                                           |
| Franklin County   | 59                                            | 830                   | 7.1%                                           |
| Hampden County    | 21                                            | 523                   | 4.0%                                           |

| County*          | Number of Farms with an Agroforestry Practice | Total Number of Farms | Percent of Farms with an Agroforestry Practice |
|------------------|-----------------------------------------------|-----------------------|------------------------------------------------|
| Hampshire County | 47                                            | 692                   | 6.8%                                           |
| Middlesex County | 16                                            | 620                   | 2.6%                                           |
| Nantucket County | 5                                             | 21                    | 23.8%                                          |
| Norfolk County   | 5                                             | 197                   | 2.5%                                           |
| Plymouth County  | 30                                            | 758                   | 4.0%                                           |
| Worcester County | 60                                            | 1568                  | 3.8%                                           |

\*Counties not listed in the table have no farms reporting an agroforestry practice in 2017.

Total number of Massachusetts farms with an agroforestry practice: 299 Total number of Massachusetts farms: 7,241

Percentage of Massachusetts farms with an agroforestry practice: 4.1%

Data Source: USDA NASS Census of Agriculture 2017

Maps and table created by USDA National Agroforestry Center

# Agroforestry in Michigan based on the 2017 Census of Agriculture

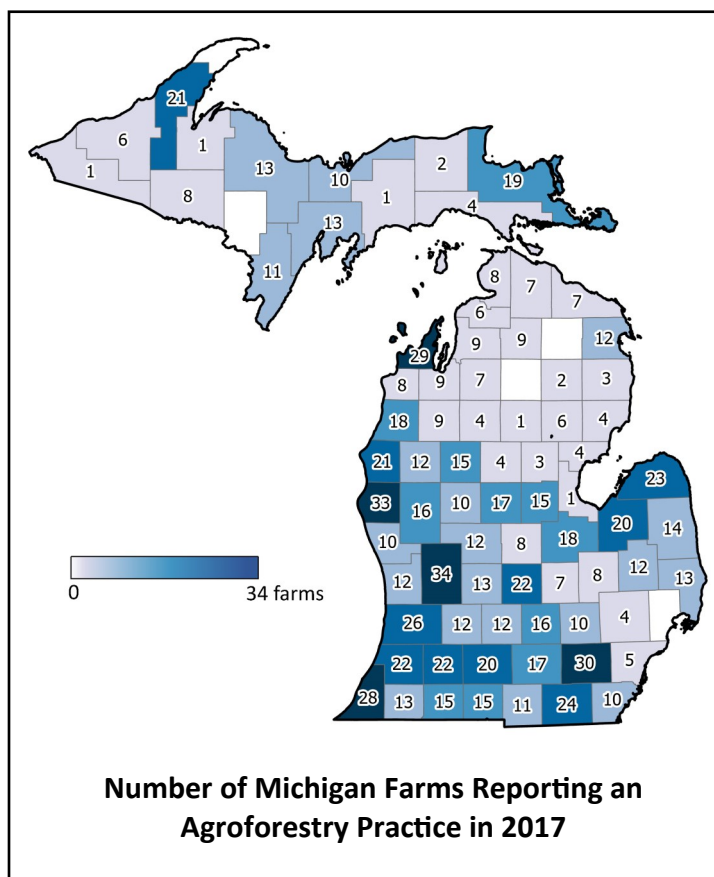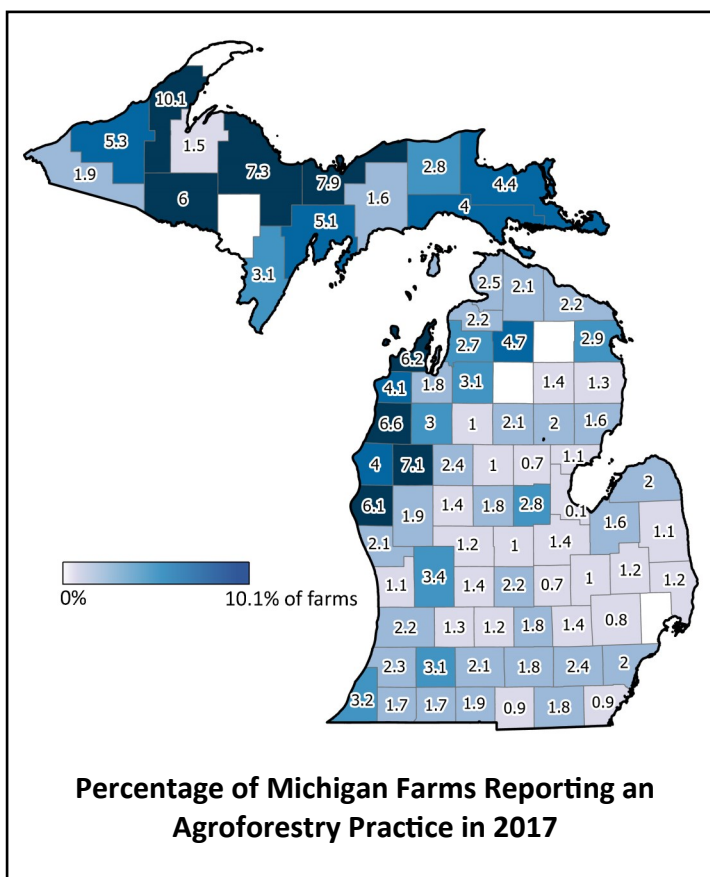

| County*    | Number of Farms with an Agroforestry Practice | Total Number of Farms | Percent of Farms with an Agroforestry Practice |
|------------|-----------------------------------------------|-----------------------|------------------------------------------------|
| Alcona     | 3                                             | 223                   | 1.3%                                           |
| Alger      | 10                                            | 126                   | 7.9%                                           |
| Allegan    | 26                                            | 1,172                 | 2.2%                                           |
| Alpena     | 12                                            | 415                   | 2.9%                                           |
| Antrim     | 9                                             | 333                   | 2.7%                                           |
| Arenac     | 4                                             | 350                   | 1.1%                                           |
| Baraga     | 1                                             | 65                    | 1.5%                                           |
| Barry      | 12                                            | 938                   | 1.3%                                           |
| Bay        | 1                                             | 726                   | 0.1%                                           |
| Benzie     | 8                                             | 197                   | 4.1%                                           |
| Berrien    | 28                                            | 872                   | 3.2%                                           |
| Branch     | 15                                            | 789                   | 1.9%                                           |
| Calhoun    | 20                                            | 958                   | 2.1%                                           |
| Cass       | 13                                            | 747                   | 1.7%                                           |
| Charlevoix | 6                                             | 271                   | 2.2%                                           |
| Cheboygan  | 7                                             | 330                   | 2.1%                                           |
| Chippewa   | 19                                            | 427                   | 4.4%                                           |
| Clare      | 4                                             | 396                   | 1.0%                                           |
| Clinton    | 22                                            | 1,017                 | 2.2%                                           |
| Delta      | 13                                            | 253                   | 5.1%                                           |

| County*        | Number of Farms with an Agroforestry Practice | Total Number of Farms | Percent of Farms with an Agroforestry Practice |
|----------------|-----------------------------------------------|-----------------------|------------------------------------------------|
| Eaton          | 12                                            | 962                   | 1.2%                                           |
| Emmet          | 8                                             | 324                   | 2.5%                                           |
| Genesee        | 8                                             | 820                   | 1.0%                                           |
| Gladwin        | 3                                             | 459                   | 0.7%                                           |
| Gogebic        | 1                                             | 54                    | 1.9%                                           |
| Grand Traverse | 9                                             | 497                   | 1.8%                                           |
| Gratiot        | 8                                             | 812                   | 1.0%                                           |
| Hillsdale      | 11                                            | 1,205                 | 0.9%                                           |
| Houghton       | 21                                            | 208                   | 10.1%                                          |
| Huron          | 23                                            | 1,153                 | 2.0%                                           |
| Ingham         | 16                                            | 912                   | 1.8%                                           |
| Ionia          | 13                                            | 954                   | 1.4%                                           |
| Iosco          | 4                                             | 244                   | 1.6%                                           |
| Iron           | 8                                             | 133                   | 6.0%                                           |
| Isabella       | 17                                            | 959                   | 1.8%                                           |
| Jackson        | 17                                            | 923                   | 1.8%                                           |
| Kalamazoo      | 22                                            | 707                   | 3.1%                                           |
| Kalkaska       | 7                                             | 225                   | 3.1%                                           |
| Kent           | 34                                            | 1,010                 | 3.4%                                           |
| Lake           | 12                                            | 168                   | 7.1%                                           |

## Agroforestry in Michigan based on the 2017 Census of Agriculture

| County*    | Number of Farms with an Agroforestry Practice | Total Number of Farms | Percent of Farms with an Agroforestry Practice |
|------------|-----------------------------------------------|-----------------------|------------------------------------------------|
| Lapeer     | 12                                            | 1,013                 | 1.2%                                           |
| Leelanau   | 29                                            | 470                   | 6.2%                                           |
| Lenawee    | 24                                            | 1,361                 | 1.8%                                           |
| Livingston | 10                                            | 724                   | 1.4%                                           |
| Luce       | 2                                             | 71                    | 2.8%                                           |
| Mackinac   | 4                                             | 101                   | 4.0%                                           |
| Manistee   | 18                                            | 274                   | 6.6%                                           |
| Marquette  | 13                                            | 179                   | 7.3%                                           |
| Mason      | 21                                            | 472                   | 4.4%                                           |
| Mecosta    | 10                                            | 694                   | 1.4%                                           |
| Menominee  | 11                                            | 353                   | 3.1%                                           |
| Midland    | 15                                            | 530                   | 2.8%                                           |
| Missaukee  | 4                                             | 406                   | 1.0%                                           |
| Monroe     | 10                                            | 1,085                 | 0.9%                                           |
| Montcalm   | 12                                            | 962                   | 1.2%                                           |
| Muskegon   | 10                                            | 476                   | 2.1%                                           |
| Newaygo    | 16                                            | 850                   | 1.9%                                           |
| Oakland    | 4                                             | 514                   | 0.8%                                           |
| Oceana     | 33                                            | 545                   | 6.1%                                           |

| County*      | Number of Farms with an Agroforestry Practice | Total Number of Farms | Percent of Farms with an Agroforestry Practice |
|--------------|-----------------------------------------------|-----------------------|------------------------------------------------|
| Ogemaw       | 6                                             | 294                   | 2.0%                                           |
| Ontonagon    | 6                                             | 114                   | 5.3%                                           |
| Osceola      | 15                                            | 625                   | 2.4%                                           |
| Oscoda       | 2                                             | 144                   | 1.4%                                           |
| Otsego       | 9                                             | 193                   | 4.7%                                           |
| Ottawa       | 12                                            | 1,130                 | 1.1%                                           |
| Presque Isle | 7                                             | 322                   | 2.2%                                           |
| Roscommon    | 1                                             | 48                    | 2.1%                                           |
| Saginaw      | 18                                            | 1,250                 | 1.4%                                           |
| Sanilac      | 14                                            | 1,315                 | 1.1%                                           |
| Schoolcraft  | 1                                             | 62                    | 1.6%                                           |
| Shiawassee   | 7                                             | 972                   | 0.7%                                           |
| St. Clair    | 13                                            | 1,077                 | 1.2%                                           |
| St. Joseph   | 15                                            | 896                   | 1.7%                                           |
| Tuscola      | 20                                            | 1,241                 | 1.6%                                           |
| Van Buren    | 22                                            | 953                   | 2.3%                                           |
| Washtenaw    | 30                                            | 1,245                 | 2.4%                                           |
| Wayne        | 5                                             | 248                   | 2.0%                                           |
| Wexford      | 9                                             | 304                   | 3.0%                                           |

\*Counties not listed in the table have no farms reporting an agroforestry practice in 2017.

Total number of Michigan farms with an agroforestry practice: 957 Total number of Michigan farms: 47,641

Percentage of Michigan farms with an agroforestry practice: 2.0%

Data Source: USDA NASS Census of Agriculture 2017

Maps and table created by USDA National Agroforestry Center

# Agroforestry in Minnesota based on the 2017 Census of Agriculture

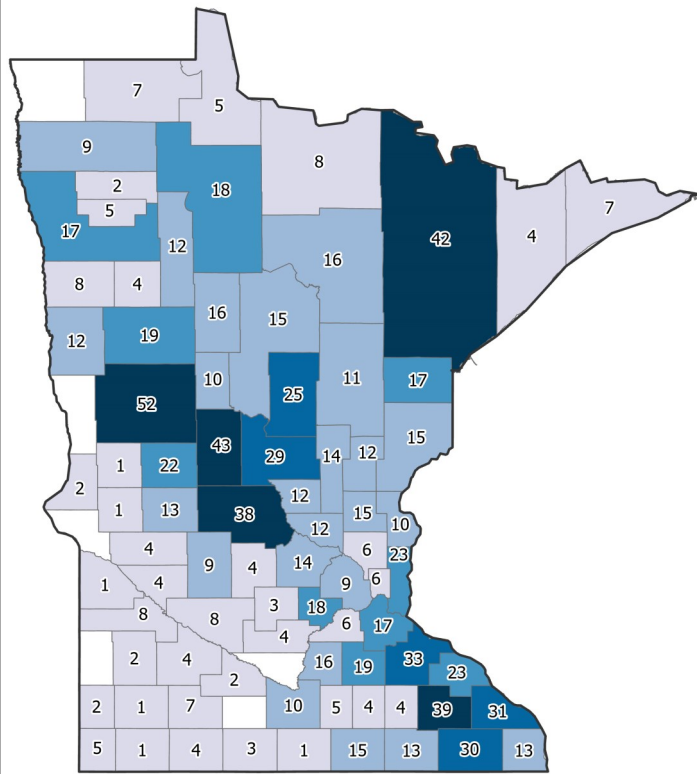

0 52 farms

**Number of Minnesota Farms Reporting an Agroforestry Practice in 2017**

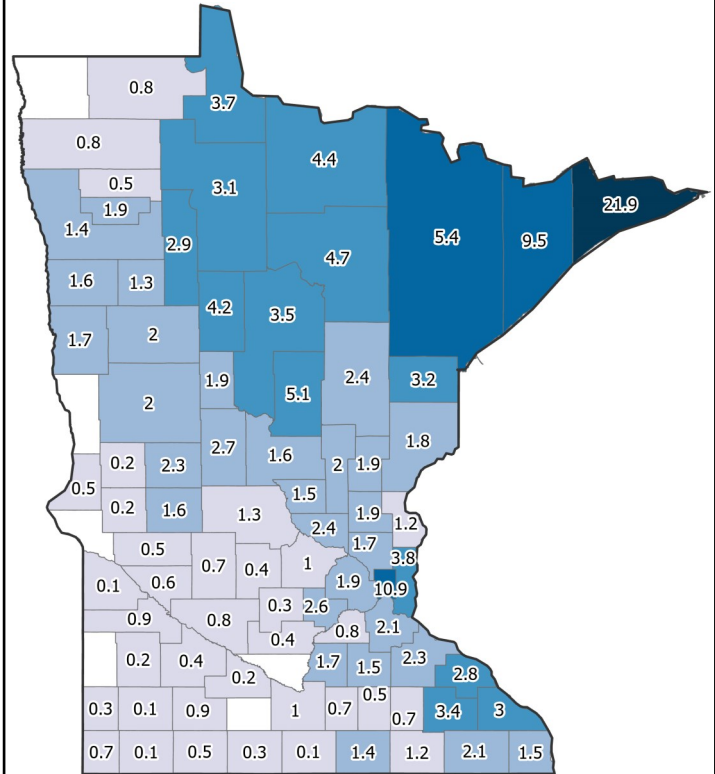

0% 21.9% of farms

**Percentage of Minnesota Farms Reporting an Agroforestry Practice in 2017**

| County*    | Number of Farms with an Agroforestry Practice | Total Number of Farms | Percent of Farms with an Agroforestry Practice |
|------------|-----------------------------------------------|-----------------------|------------------------------------------------|
| Aitkin     | 11                                            | 462                   | 2.4%                                           |
| Anoka      | 6                                             | 360                   | 1.7%                                           |
| Becker     | 19                                            | 943                   | 2.0%                                           |
| Beltrami   | 18                                            | 583                   | 3.1%                                           |
| Benton     | 12                                            | 816                   | 1.5%                                           |
| Blue Earth | 10                                            | 983                   | 1.0%                                           |
| Brown      | 2                                             | 1,040                 | 0.2%                                           |
| Carlton    | 17                                            | 529                   | 3.2%                                           |
| Carver     | 18                                            | 689                   | 2.6%                                           |
| Cass       | 15                                            | 432                   | 3.5%                                           |
| Chippewa   | 4                                             | 623                   | 0.6%                                           |
| Chisago    | 10                                            | 821                   | 1.2%                                           |
| Clay       | 12                                            | 694                   | 1.7%                                           |
| Clearwater | 12                                            | 414                   | 2.9%                                           |
| Cook       | 7                                             | 32                    | 21.9%                                          |

| County*    | Number of Farms with an Agroforestry Practice | Total Number of Farms | Percent of Farms with an Agroforestry Practice |
|------------|-----------------------------------------------|-----------------------|------------------------------------------------|
| Cottonwood | 7                                             | 744                   | 0.9%                                           |
| Crow Wing  | 25                                            | 494                   | 5.1%                                           |
| Dakota     | 17                                            | 820                   | 2.1%                                           |
| Dodge      | 4                                             | 611                   | 0.7%                                           |
| Douglas    | 22                                            | 960                   | 2.3%                                           |
| Fillmore   | 30                                            | 1,401                 | 2.1%                                           |
| Freeborn   | 15                                            | 1,076                 | 1.4%                                           |
| Goodhue    | 33                                            | 1,461                 | 2.3%                                           |
| Hennepin   | 9                                             | 467                   | 1.9%                                           |
| Houston    | 13                                            | 891                   | 1.5%                                           |
| Hubbard    | 16                                            | 384                   | 4.2%                                           |
| Isanti     | 15                                            | 805                   | 1.9%                                           |
| Itasca     | 16                                            | 337                   | 4.8%                                           |
| Jackson    | 4                                             | 799                   | 0.5%                                           |
| Kanabec    | 12                                            | 624                   | 1.9%                                           |

# Agroforestry in Minnesota based on the 2017 Census of Agriculture

| County*           | Number of Farms with an Agroforestry Practice | Total Number of Farms | Percent of Farms with an Agroforestry Practice |
|-------------------|-----------------------------------------------|-----------------------|------------------------------------------------|
| Kandiyohi         | 9                                             | 1,220                 | 0.7%                                           |
| Koochiching       | 8                                             | 181                   | 4.4%                                           |
| Lac qui Parle     | 1                                             | 853                   | 0.1%                                           |
| Lake              | 4                                             | 42                    | 9.5%                                           |
| Lake of the Woods | 5                                             | 134                   | 3.7%                                           |
| Le Sueur          | 16                                            | 937                   | 1.7%                                           |
| Lyon              | 2                                             | 893                   | 0.2%                                           |
| Mahnomen          | 4                                             | 311                   | 1.3%                                           |
| Marshall          | 9                                             | 1,086                 | 0.8%                                           |
| Martin            | 3                                             | 911                   | 0.3%                                           |
| McLeod            | 3                                             | 880                   | 0.3%                                           |
| Meeker            | 4                                             | 1,028                 | 0.4%                                           |
| Mille Lacs        | 14                                            | 707                   | 2.0%                                           |
| Morrison          | 29                                            | 1,760                 | 1.6%                                           |
| Mower             | 13                                            | 1,068                 | 1.2%                                           |
| Murray            | 1                                             | 864                   | 0.1%                                           |
| Nobles            | 1                                             | 885                   | 0.1%                                           |
| Norman            | 8                                             | 505                   | 1.6%                                           |
| Olmsted           | 39                                            | 1,139                 | 3.4%                                           |
| Otter Tail        | 52                                            | 2,544                 | 2.0%                                           |
| Pennington        | 2                                             | 409                   | 0.5%                                           |
| Pine              | 15                                            | 823                   | 1.8%                                           |
| Pipestone         | 2                                             | 595                   | 0.3%                                           |
| Polk              | 17                                            | 1,258                 | 1.4%                                           |
| Pope              | 13                                            | 837                   | 1.6%                                           |

| County*         | Number of Farms with an Agroforestry Practice | Total Number of Farms | Percent of Farms with an Agroforestry Practice |
|-----------------|-----------------------------------------------|-----------------------|------------------------------------------------|
| Ramsey          | 6                                             | 55                    | 10.9%                                          |
| Red Lake        | 5                                             | 263                   | 1.9%                                           |
| Redwood         | 4                                             | 1,134                 | 0.4%                                           |
| Renville        | 8                                             | 1,026                 | 0.8%                                           |
| Rice            | 19                                            | 1,242                 | 1.5%                                           |
| Rock            | 5                                             | 701                   | 0.7%                                           |
| Roseau          | 7                                             | 842                   | 0.8%                                           |
| Scott           | 6                                             | 740                   | 0.8%                                           |
| Sherburne       | 12                                            | 501                   | 2.4%                                           |
| Sibley          | 4                                             | 898                   | 0.4%                                           |
| St. Louis       | 42                                            | 779                   | 4.7%                                           |
| Stearns         | 38                                            | 2,951                 | 1.3%                                           |
| Steele          | 4                                             | 746                   | 0.5%                                           |
| Stevens         | 1                                             | 553                   | 0.2%                                           |
| Swift           | 4                                             | 760                   | 0.5%                                           |
| Todd            | 43                                            | 1,604                 | 2.7%                                           |
| Traverse        | 2                                             | 411                   | 0.5%                                           |
| Wabasha         | 23                                            | 809                   | 2.8%                                           |
| Wadena          | 10                                            | 516                   | 1.9%                                           |
| Waseca          | 5                                             | 729                   | 0.7%                                           |
| Washington      | 23                                            | 612                   | 3.8%                                           |
| Winona          | 31                                            | 1,034                 | 3.0%                                           |
| Wright          | 14                                            | 1,338                 | 1.0%                                           |
| Yellow Medicine | 8                                             | 852                   | 0.9%                                           |

\*Counties not listed in the table have no farms reporting an agroforestry practice in 2017.

**Total number of Minnesota farms with an agroforestry practice: 1,011    Total number of Minnesota farms: 68,882**

**Percentage of Minnesota farms with an agroforestry practice: 1.5%**

**Data Source: USDA NASS Census of Agriculture 2017**

**Maps and table created by USDA National Agroforestry Center**

# Agroforestry in Mississippi based on the 2017 Census of Agriculture

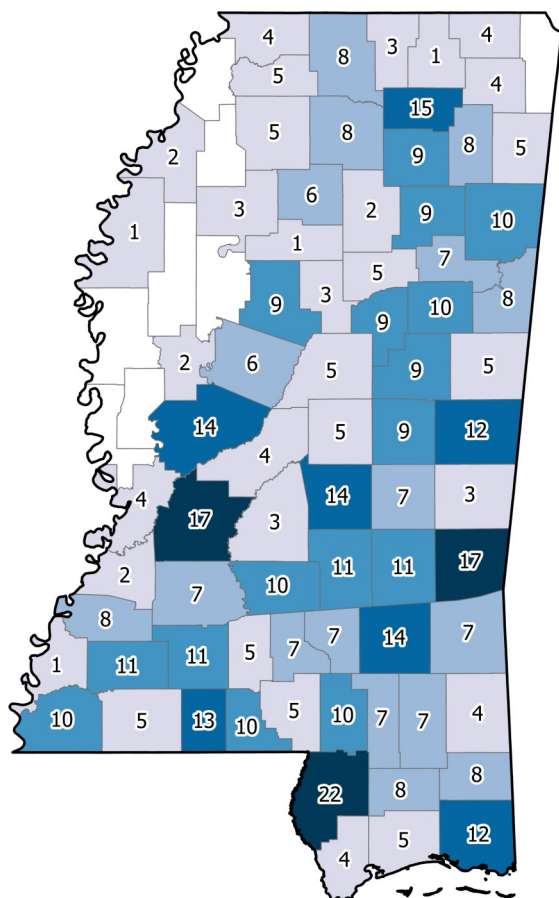

**Number of Mississippi Farms Reporting an Agroforestry Practice in 2017**

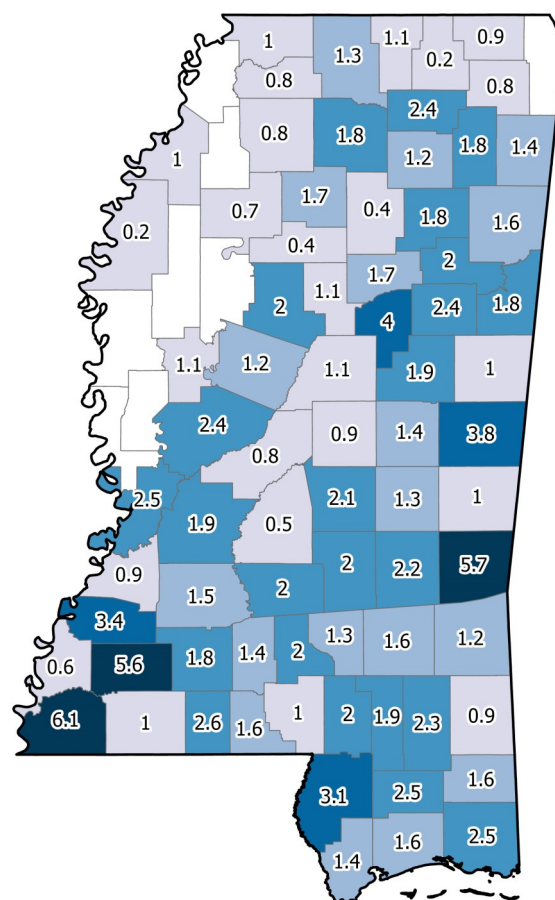

**Percentage of Mississippi Farms Reporting an Agroforestry Practice in 2017**

| County*   | Number of Farms with an Agroforestry Practice | Total Number of Farms | Percent of Farms with an Agroforestry Practice |
|-----------|-----------------------------------------------|-----------------------|------------------------------------------------|
| Adams     | 1                                             | 171                   | 0.6%                                           |
| Alcorn    | 4                                             | 457                   | 0.9%                                           |
| Amite     | 5                                             | 484                   | 1.0%                                           |
| Attala    | 5                                             | 468                   | 1.1%                                           |
| Benton    | 3                                             | 285                   | 1.1%                                           |
| Bolivar   | 1                                             | 412                   | 0.2%                                           |
| Calhoun   | 2                                             | 518                   | 0.4%                                           |
| Carroll   | 9                                             | 446                   | 2.0%                                           |
| Chickasaw | 9                                             | 506                   | 1.8%                                           |
| Choctaw   | 9                                             | 227                   | 4.0%                                           |
| Claiborne | 2                                             | 224                   | 0.9%                                           |
| Clarke    | 17                                            | 300                   | 5.7%                                           |

| County*   | Number of Farms with an Agroforestry Practice | Total Number of Farms | Percent of Farms with an Agroforestry Practice |
|-----------|-----------------------------------------------|-----------------------|------------------------------------------------|
| Clay      | 7                                             | 354                   | 2.0%                                           |
| Coahoma   | 2                                             | 206                   | 1.0%                                           |
| Copiah    | 7                                             | 478                   | 1.5%                                           |
| Covington | 7                                             | 523                   | 1.3%                                           |
| DeSoto    | 4                                             | 398                   | 1.0%                                           |
| Forrest   | 7                                             | 376                   | 1.9%                                           |
| Franklin  | 11                                            | 198                   | 5.6%                                           |
| George    | 8                                             | 492                   | 1.6%                                           |
| Greene    | 4                                             | 436                   | 0.9%                                           |
| Grenada   | 1                                             | 245                   | 0.4%                                           |
| Hancock   | 4                                             | 287                   | 1.4%                                           |
| Harrison  | 5                                             | 322                   | 1.6%                                           |

## Agroforestry in Mississippi based on the 2017 Census of Agriculture

| County*         | Number of Farms with an Agroforestry Practice | Total Number of Farms | Percent of Farms with an Agroforestry Practice |
|-----------------|-----------------------------------------------|-----------------------|------------------------------------------------|
| Hinds           | 17                                            | 872                   | 1.9%                                           |
| Holmes          | 6                                             | 496                   | 1.2%                                           |
| Humphreys       | 2                                             | 179                   | 1.1%                                           |
| Itawamba        | 5                                             | 364                   | 1.4%                                           |
| Jackson         | 12                                            | 473                   | 2.5%                                           |
| Jasper          | 11                                            | 507                   | 2.2%                                           |
| Jefferson       | 8                                             | 236                   | 3.4%                                           |
| Jefferson Davis | 7                                             | 355                   | 2.0%                                           |
| Jones           | 14                                            | 882                   | 1.6%                                           |
| Kemper          | 12                                            | 313                   | 3.8%                                           |
| Lafayette       | 8                                             | 443                   | 1.8%                                           |
| Lamar           | 10                                            | 491                   | 2.0%                                           |
| Lauderdale      | 3                                             | 305                   | 1.0%                                           |
| Lawrence        | 5                                             | 354                   | 1.4%                                           |
| Leake           | 5                                             | 573                   | 0.9%                                           |
| Lee             | 8                                             | 436                   | 1.8%                                           |
| Lincoln         | 11                                            | 611                   | 1.8%                                           |
| Lowndes         | 8                                             | 444                   | 1.8%                                           |
| Madison         | 4                                             | 524                   | 0.8%                                           |
| Marion          | 5                                             | 511                   | 1.0%                                           |
| Marshall        | 8                                             | 634                   | 1.3%                                           |
| Monroe          | 10                                            | 644                   | 1.6%                                           |
| Montgomery      | 3                                             | 270                   | 1.1%                                           |
| Neshoba         | 9                                             | 652                   | 1.4%                                           |
| Newton          | 7                                             | 527                   | 1.3%                                           |

| County*      | Number of Farms with an Agroforestry Practice | Total Number of Farms | Percent of Farms with an Agroforestry Practice |
|--------------|-----------------------------------------------|-----------------------|------------------------------------------------|
| Noxubee      | 5                                             | 517                   | 1.0%                                           |
| Oktibbeha    | 10                                            | 412                   | 2.4%                                           |
| Panola       | 5                                             | 627                   | 0.8%                                           |
| Pearl River  | 22                                            | 717                   | 3.1%                                           |
| Perry        | 7                                             | 306                   | 2.3%                                           |
| Pike         | 13                                            | 508                   | 2.6%                                           |
| Pontotoc     | 9                                             | 745                   | 1.2%                                           |
| Prentiss     | 4                                             | 486                   | 0.8%                                           |
| Rankin       | 3                                             | 577                   | 0.5%                                           |
| Scott        | 14                                            | 660                   | 2.1%                                           |
| Simpson      | 10                                            | 498                   | 2.0%                                           |
| Smith        | 11                                            | 540                   | 2.0%                                           |
| Stone        | 8                                             | 323                   | 2.5%                                           |
| Tallahatchie | 3                                             | 436                   | 0.7%                                           |
| Tate         | 5                                             | 593                   | 0.8%                                           |
| Tippah       | 1                                             | 557                   | 0.2%                                           |
| Union        | 15                                            | 618                   | 2.4%                                           |
| Walthall     | 10                                            | 635                   | 1.6%                                           |
| Warren       | 4                                             | 160                   | 2.5%                                           |
| Wayne        | 7                                             | 562                   | 1.2%                                           |
| Webster      | 5                                             | 292                   | 1.7%                                           |
| Wilkinson    | 10                                            | 163                   | 6.1%                                           |
| Winston      | 9                                             | 483                   | 1.9%                                           |
| Yalobusha    | 6                                             | 348                   | 1.7%                                           |
| Yazoo        | 14                                            | 574                   | 2.4%                                           |

\*Counties not listed in the table have no farms reporting an agroforestry practice in 2017.

**Total number of Mississippi farms with an agroforestry practice: 542    Total number of Mississippi farms: 34,988**

**Percentage of Mississippi farms with an agroforestry practice: 1.5%**

**Data Source: USDA NASS Census of Agriculture 2017**

**Maps and table created by USDA National Agroforestry Center**

# Agroforestry in Missouri based on the 2017 Census of Agriculture

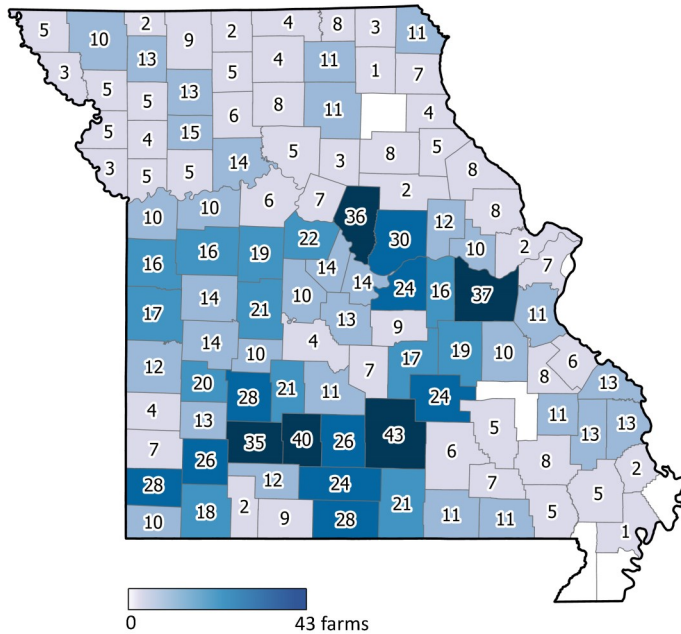

**Number of Missouri Farms Reporting an Agroforestry Practice in 2017**

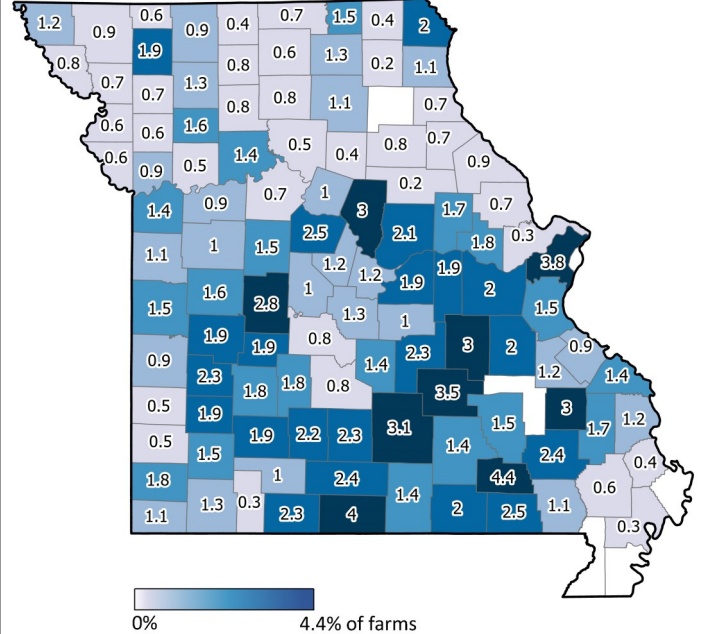

**Percentage of Missouri Farms Reporting an Agroforestry Practice in 2017**

| County*        | Number of Farms with an Agroforestry Practice | Total Number of Farms | Percent of Farms with an Agroforestry Practice |
|----------------|-----------------------------------------------|-----------------------|------------------------------------------------|
| Adair          | 11                                            | 816                   | 1.3%                                           |
| Andrew         | 5                                             | 706                   | 0.7%                                           |
| Atchison       | 5                                             | 401                   | 1.2%                                           |
| Audrain        | 2                                             | 911                   | 0.2%                                           |
| Barry          | 18                                            | 1,392                 | 1.3%                                           |
| Barton         | 4                                             | 865                   | 0.5%                                           |
| Bates          | 17                                            | 1,160                 | 1.5%                                           |
| Benton         | 21                                            | 749                   | 2.8%                                           |
| Bollinger      | 13                                            | 756                   | 1.7%                                           |
| Boone          | 36                                            | 1,184                 | 3.0%                                           |
| Buchanan       | 5                                             | 797                   | 0.6%                                           |
| Butler         | 5                                             | 441                   | 1.1%                                           |
| Caldwell       | 15                                            | 924                   | 1.6%                                           |
| Callaway       | 30                                            | 1,438                 | 2.1%                                           |
| Camden         | 4                                             | 516                   | 0.8%                                           |
| Cape Girardeau | 13                                            | 1,111                 | 1.2%                                           |
| Carroll        | 14                                            | 1,016                 | 1.4%                                           |
| Carter         | 7                                             | 160                   | 4.4%                                           |
| Cass           | 16                                            | 1,477                 | 1.1%                                           |
| Cedar          | 20                                            | 854                   | 2.3%                                           |

| County*   | Number of Farms with an Agroforestry Practice | Total Number of Farms | Percent of Farms with an Agroforestry Practice |
|-----------|-----------------------------------------------|-----------------------|------------------------------------------------|
| Chariton  | 5                                             | 985                   | 0.5%                                           |
| Christian | 12                                            | 1,169                 | 1.0%                                           |
| Clark     | 11                                            | 547                   | 2.0%                                           |
| Clay      | 5                                             | 552                   | 0.9%                                           |
| Clinton   | 4                                             | 684                   | 0.6%                                           |
| Cole      | 14                                            | 1,169                 | 1.2%                                           |
| Cooper    | 22                                            | 883                   | 2.5%                                           |
| Crawford  | 19                                            | 628                   | 3.0%                                           |
| Dade      | 13                                            | 699                   | 1.9%                                           |
| Dallas    | 21                                            | 1,176                 | 1.8%                                           |
| Daviess   | 13                                            | 1,015                 | 1.3%                                           |
| DeKalb    | 5                                             | 708                   | 0.7%                                           |
| Dent      | 24                                            | 694                   | 3.5%                                           |
| Douglas   | 24                                            | 994                   | 2.4%                                           |
| Franklin  | 37                                            | 1,818                 | 2.0%                                           |
| Gasconade | 16                                            | 823                   | 1.9%                                           |
| Gentry    | 13                                            | 686                   | 1.9%                                           |
| Greene    | 35                                            | 1,857                 | 1.9%                                           |
| Grundy    | 5                                             | 662                   | 0.8%                                           |
| Harrison  | 9                                             | 974                   | 0.9%                                           |

## Agroforestry in Missouri based on the 2017 Census of Agriculture

| County*    | Number of Farms with an Agroforestry Practice | Total Number of Farms | Percent of Farms with an Agroforestry Practice |
|------------|-----------------------------------------------|-----------------------|------------------------------------------------|
| Henry      | 14                                            | 898                   | 1.6%                                           |
| Hickory    | 10                                            | 529                   | 1.9%                                           |
| Holt       | 3                                             | 380                   | 0.8%                                           |
| Howard     | 7                                             | 690                   | 1.0%                                           |
| Howell     | 21                                            | 1,451                 | 1.4%                                           |
| Jackson    | 10                                            | 706                   | 1.4%                                           |
| Jasper     | 7                                             | 1,315                 | 0.5%                                           |
| Jefferson  | 11                                            | 721                   | 1.5%                                           |
| Johnson    | 16                                            | 1,626                 | 1.0%                                           |
| Knox       | 1                                             | 637                   | 0.2%                                           |
| Laclede    | 11                                            | 1,304                 | 0.8%                                           |
| Lafayette  | 10                                            | 1,175                 | 0.9%                                           |
| Lawrence   | 26                                            | 1,697                 | 1.5%                                           |
| Lewis      | 7                                             | 636                   | 1.1%                                           |
| Lincoln    | 8                                             | 1,092                 | 0.7%                                           |
| Linn       | 8                                             | 994                   | 0.8%                                           |
| Livingston | 6                                             | 784                   | 0.8%                                           |
| Macon      | 11                                            | 1,163                 | 0.9%                                           |
| Madison    | 11                                            | 361                   | 3.0%                                           |
| Maries     | 9                                             | 879                   | 1.0%                                           |
| Marion     | 4                                             | 587                   | 0.7%                                           |
| McDonald   | 10                                            | 940                   | 1.1%                                           |
| Mercer     | 2                                             | 493                   | 0.4%                                           |
| Miller     | 13                                            | 1,023                 | 1.3%                                           |
| Moniteau   | 14                                            | 1,135                 | 1.2%                                           |
| Monroe     | 8                                             | 978                   | 0.8%                                           |
| Montgomery | 12                                            | 698                   | 1.7%                                           |
| Morgan     | 10                                            | 962                   | 1.0%                                           |
| New Madrid | 1                                             | 290                   | 0.3%                                           |
| Newton     | 28                                            | 1,588                 | 1.8%                                           |
| Nodaway    | 10                                            | 1,133                 | 0.9%                                           |
| Oregon     | 11                                            | 564                   | 2.0%                                           |
| Osage      | 24                                            | 1,277                 | 1.9%                                           |
| Ozark      | 28                                            | 705                   | 4.0%                                           |
| Perry      | 13                                            | 921                   | 1.4%                                           |

| County*        | Number of Farms with an Agroforestry Practice | Total Number of Farms | Percent of Farms with an Agroforestry Practice |
|----------------|-----------------------------------------------|-----------------------|------------------------------------------------|
| Pettis         | 19                                            | 1,259                 | 1.5%                                           |
| Phelps         | 17                                            | 728                   | 2.3%                                           |
| Pike           | 8                                             | 926                   | 0.9%                                           |
| Platte         | 3                                             | 490                   | 0.6%                                           |
| Polk           | 28                                            | 1,562                 | 1.8%                                           |
| Pulaski        | 7                                             | 502                   | 1.4%                                           |
| Putnam         | 4                                             | 585                   | 0.7%                                           |
| Ralls          | 5                                             | 672                   | 0.7%                                           |
| Randolph       | 3                                             | 783                   | 0.4%                                           |
| Ray            | 5                                             | 1,070                 | 0.5%                                           |
| Reynolds       | 5                                             | 341                   | 1.5%                                           |
| Ripley         | 11                                            | 438                   | 2.5%                                           |
| Saline         | 6                                             | 882                   | 0.7%                                           |
| Schuyler       | 8                                             | 541                   | 1.5%                                           |
| Scotland       | 3                                             | 713                   | 0.4%                                           |
| Scott          | 2                                             | 450                   | 0.4%                                           |
| Shannon        | 6                                             | 435                   | 1.4%                                           |
| St. Charles    | 2                                             | 604                   | 0.3%                                           |
| St. Clair      | 14                                            | 734                   | 1.9%                                           |
| St. Francois   | 8                                             | 688                   | 1.2%                                           |
| St. Louis      | 7                                             | 184                   | 3.8%                                           |
| Ste. Genevieve | 6                                             | 660                   | 0.9%                                           |
| Stoddard       | 5                                             | 792                   | 0.6%                                           |
| Stone          | 2                                             | 628                   | 0.3%                                           |
| Sullivan       | 4                                             | 671                   | 0.6%                                           |
| Taney          | 9                                             | 395                   | 2.3%                                           |
| Texas          | 43                                            | 1,371                 | 3.1%                                           |
| Vernon         | 12                                            | 1,265                 | 0.9%                                           |
| Warren         | 10                                            | 568                   | 1.8%                                           |
| Washington     | 10                                            | 502                   | 2.0%                                           |
| Wayne          | 8                                             | 340                   | 2.4%                                           |
| Webster        | 40                                            | 1,837                 | 2.2%                                           |
| Worth          | 2                                             | 336                   | 0.6%                                           |
| Wright         | 26                                            | 1,115                 | 2.3%                                           |

\*Counties not listed in the table have no farms reporting an agroforestry practice in 2017.

Total number of Missouri farms with an agroforestry practice: 1,311 Total number of Missouri farms: 95,320

Percentage of Missouri farms with an agroforestry practice: 1.4%

Data Source: USDA NASS Census of Agriculture 2017

Maps and table created by USDA National Agroforestry Center

# Agroforestry in Montana based on the 2017 Census of Agriculture

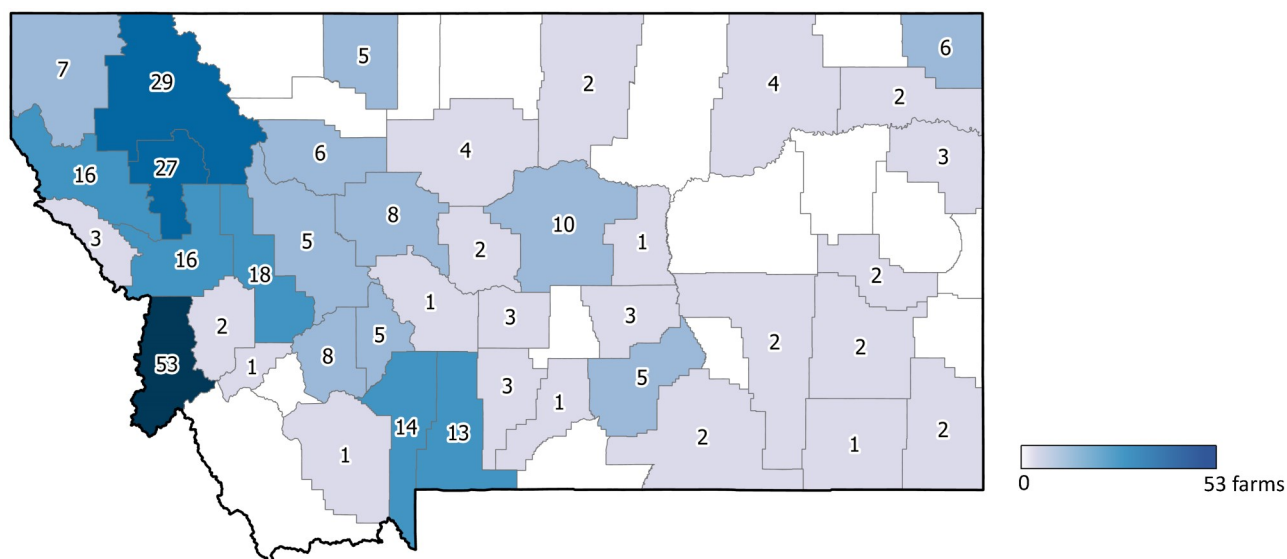

Number of Montana Farms Reporting an Agroforestry Practice in 2017

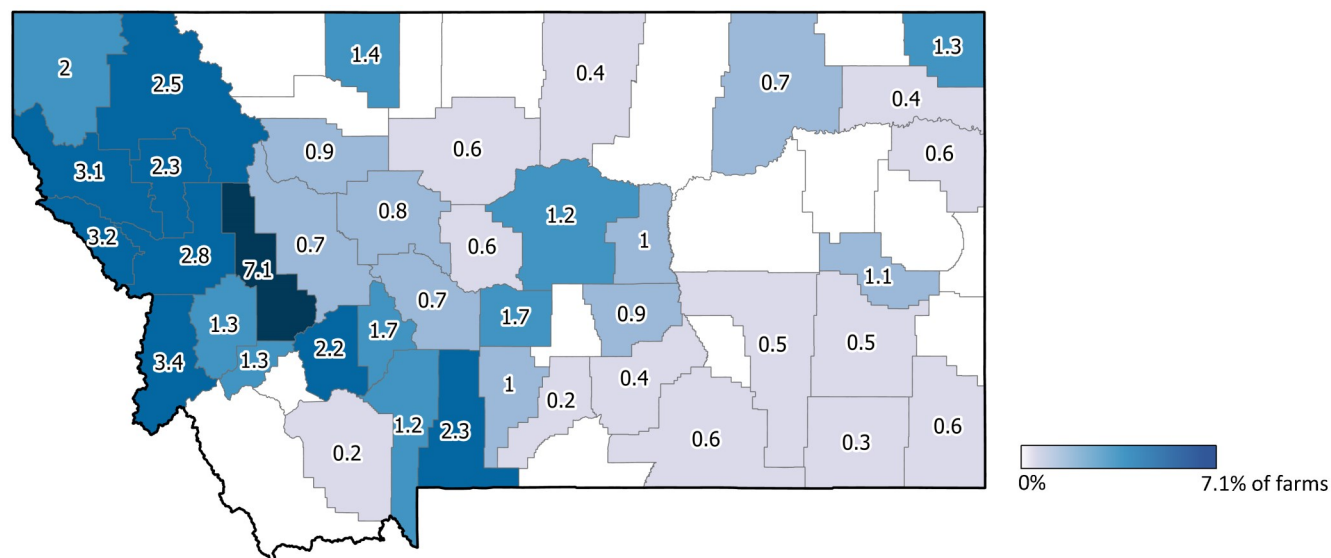

Percentage of Montana Farms Reporting an Agroforestry Practice in 2017

| County*    | Number of Farms with an Agroforestry Practice | Total Number of Farms | Percent of Farms with an Agroforestry Practice |
|------------|-----------------------------------------------|-----------------------|------------------------------------------------|
| Big Horn   | 2                                             | 353                   | 0.6%                                           |
| Blaine     | 2                                             | 491                   | 0.4%                                           |
| Broadwater | 5                                             | 296                   | 1.7%                                           |
| Carter     | 2                                             | 323                   | 0.6%                                           |

| County*    | Number of Farms with an Agroforestry Practice | Total Number of Farms | Percent of Farms with an Agroforestry Practice |
|------------|-----------------------------------------------|-----------------------|------------------------------------------------|
| Cascade    | 8                                             | 1,027                 | 0.8%                                           |
| Chouteau   | 4                                             | 633                   | 0.6%                                           |
| Custer     | 2                                             | 441                   | 0.5%                                           |
| Deer Lodge | 1                                             | 77                    | 1.3%                                           |

## Agroforestry in Montana based on the 2017 Census of Agriculture

| County*         | Number of Farms with an Agroforestry Practice | Total Number of Farms | Percent of Farms with an Agroforestry Practice |
|-----------------|-----------------------------------------------|-----------------------|------------------------------------------------|
| Fergus          | 10                                            | 845                   | 1.2%                                           |
| Flathead        | 29                                            | 1,146                 | 2.5%                                           |
| Gallatin        | 14                                            | 1,123                 | 1.2%                                           |
| Granite         | 2                                             | 151                   | 1.3%                                           |
| Jefferson       | 8                                             | 370                   | 2.2%                                           |
| Judith Basin    | 2                                             | 357                   | 0.6%                                           |
| Lake            | 27                                            | 1,170                 | 2.3%                                           |
| Lewis and Clark | 5                                             | 707                   | 0.7%                                           |
| Lincoln         | 7                                             | 345                   | 2.0%                                           |
| Madison         | 1                                             | 605                   | 0.2%                                           |
| Meagher         | 1                                             | 145                   | 0.7%                                           |
| Mineral         | 3                                             | 93                    | 3.2%                                           |
| Missoula        | 16                                            | 576                   | 2.8%                                           |
| Musselshell     | 3                                             | 346                   | 0.9%                                           |
| Park            | 13                                            | 575                   | 2.3%                                           |
| Petroleum       | 1                                             | 104                   | 1.0%                                           |

| County*      | Number of Farms with an Agroforestry Practice | Total Number of Farms | Percent of Farms with an Agroforestry Practice |
|--------------|-----------------------------------------------|-----------------------|------------------------------------------------|
| Powder River | 1                                             | 325                   | 0.3%                                           |
| Powell       | 18                                            | 254                   | 7.1%                                           |
| Prairie      | 2                                             | 179                   | 1.1%                                           |
| Ravalli      | 53                                            | 1,576                 | 3.4%                                           |
| Richland     | 3                                             | 527                   | 0.6%                                           |
| Roosevelt    | 2                                             | 501                   | 0.4%                                           |
| Rosebud      | 2                                             | 414                   | 0.5%                                           |
| Sanders      | 16                                            | 521                   | 3.1%                                           |
| Sheridan     | 6                                             | 458                   | 1.3%                                           |
| Stillwater   | 1                                             | 562                   | 0.2%                                           |
| Sweet Grass  | 3                                             | 301                   | 1.0%                                           |
| Teton        | 6                                             | 686                   | 0.9%                                           |
| Toole        | 5                                             | 362                   | 1.4%                                           |
| Valley       | 4                                             | 557                   | 0.7%                                           |
| Wheatland    | 3                                             | 174                   | 1.7%                                           |
| Yellowstone  | 5                                             | 1,314                 | 0.4%                                           |

\*Counties not listed in the table have no farms reporting an agroforestry practice in 2017.

**Total number of Montana farms with an agroforestry practice: 298    Total number of Montana farms: 27,048**

**Percentage of Montana farms with an agroforestry practice: 1.1%**

**Data Source: USDA NASS Census of Agriculture 2017**

**Maps and table created by USDA National Agroforestry Center**

# Agroforestry in Nebraska based on the 2017 Census of Agriculture

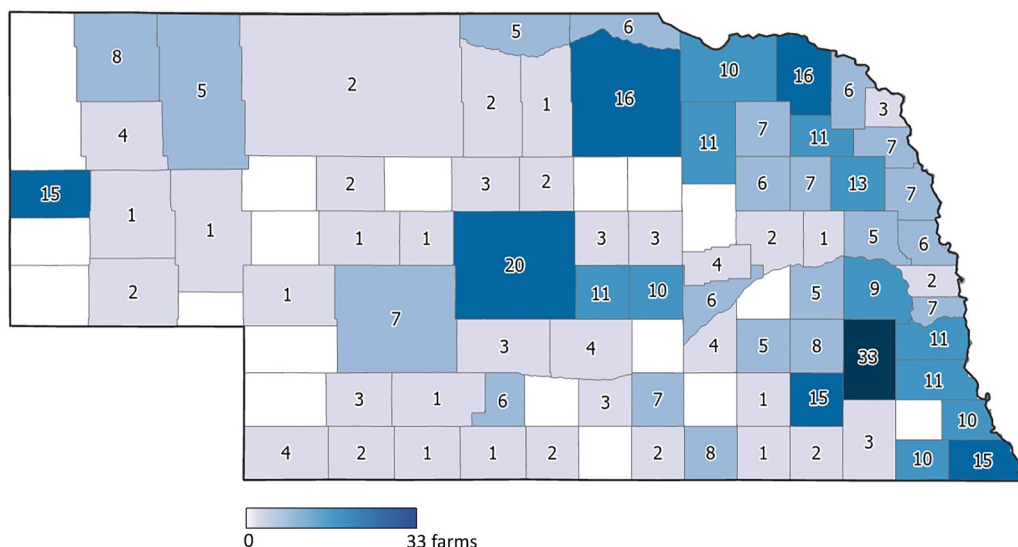

**Number of Nebraska Farms Reporting an Agroforestry Practice in 2017**

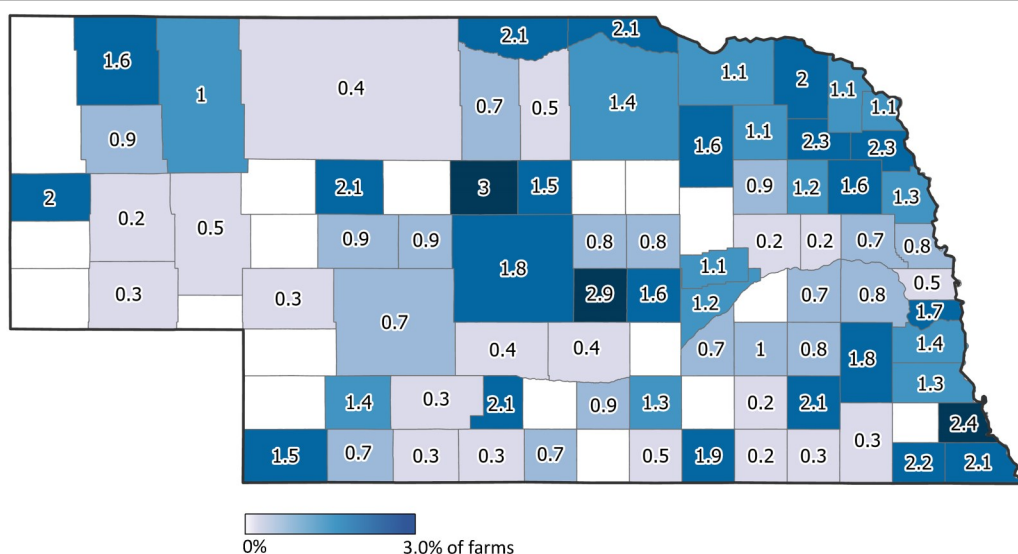

**Percentage of Nebraska Farms Reporting an Agroforestry Practice in 2017**

| County*   | Number of Farms with an Agroforestry Practice | Total Number of Farms | Percent of Farms with an Agroforestry Practice |
|-----------|-----------------------------------------------|-----------------------|------------------------------------------------|
| Adams     | 7                                             | 545                   | 1.3%                                           |
| Antelope  | 11                                            | 704                   | 1.6%                                           |
| Blaine    | 3                                             | 101                   | 3.0%                                           |
| Box Butte | 4                                             | 431                   | 0.9%                                           |
| Boyd      | 6                                             | 286                   | 2.1%                                           |
| Brown     | 2                                             | 268                   | 0.7%                                           |
| Buffalo   | 4                                             | 953                   | 0.4%                                           |
| Burt      | 7                                             | 521                   | 1.3%                                           |
| Butler    | 5                                             | 723                   | 0.7%                                           |

| County*  | Number of Farms with an Agroforestry Practice | Total Number of Farms | Percent of Farms with an Agroforestry Practice |
|----------|-----------------------------------------------|-----------------------|------------------------------------------------|
| Cass     | 11                                            | 766                   | 1.4%                                           |
| Cedar    | 16                                            | 784                   | 2.0%                                           |
| Cherry   | 2                                             | 567                   | 0.4%                                           |
| Cheyenne | 2                                             | 572                   | 0.3%                                           |
| Colfax   | 1                                             | 516                   | 0.2%                                           |
| Cuming   | 13                                            | 804                   | 1.6%                                           |
| Custer   | 20                                            | 1,108                 | 1.8%                                           |
| Dakota   | 3                                             | 267                   | 1.1%                                           |
| Dawes    | 8                                             | 491                   | 1.6%                                           |

# Agroforestry in Nebraska based on the 2017 Census of Agriculture

| County*   | Number of Farms with an Agroforestry Practice | Total Number of Farms | Percent of Farms with an Agroforestry Practice |
|-----------|-----------------------------------------------|-----------------------|------------------------------------------------|
| Dawson    | 3                                             | 686                   | 0.4%                                           |
| Dixon     | 6                                             | 567                   | 1.1%                                           |
| Dodge     | 5                                             | 676                   | 0.7%                                           |
| Douglas   | 2                                             | 367                   | 0.5%                                           |
| Dundy     | 4                                             | 268                   | 1.5%                                           |
| Fillmore  | 1                                             | 439                   | 0.2%                                           |
| Frontier  | 1                                             | 371                   | 0.3%                                           |
| Furnas    | 1                                             | 377                   | 0.3%                                           |
| Gage      | 3                                             | 1,188                 | 0.3%                                           |
| Garden    | 1                                             | 221                   | 0.5%                                           |
| Gosper    | 6                                             | 287                   | 2.1%                                           |
| Greeley   | 3                                             | 369                   | 0.8%                                           |
| Hamilton  | 4                                             | 586                   | 0.7%                                           |
| Harlan    | 2                                             | 281                   | 0.7%                                           |
| Hayes     | 3                                             | 220                   | 1.4%                                           |
| Hitchcock | 2                                             | 288                   | 0.7%                                           |
| Holt      | 16                                            | 1,142                 | 1.4%                                           |
| Hooker    | 2                                             | 97                    | 2.1%                                           |
| Howard    | 10                                            | 617                   | 1.6%                                           |
| Jefferson | 2                                             | 590                   | 0.3%                                           |
| Kearney   | 3                                             | 342                   | 0.9%                                           |
| Keith     | 1                                             | 318                   | 0.3%                                           |
| Keya Paha | 5                                             | 237                   | 2.1%                                           |
| Knox      | 10                                            | 956                   | 1.1%                                           |
| Lancaster | 33                                            | 1,786                 | 1.8%                                           |
| Lincoln   | 7                                             | 1,040                 | 0.7%                                           |
| Logan     | 1                                             | 117                   | 0.9%                                           |
| Loup      | 2                                             | 130                   | 1.5%                                           |
| Madison   | 6                                             | 659                   | 0.9%                                           |

| County*      | Number of Farms with an Agroforestry Practice | Total Number of Farms | Percent of Farms with an Agroforestry Practice |
|--------------|-----------------------------------------------|-----------------------|------------------------------------------------|
| McPherson    | 1                                             | 109                   | 0.9%                                           |
| Merrick      | 6                                             | 483                   | 1.2%                                           |
| Morrill      | 1                                             | 426                   | 0.2%                                           |
| Nance        | 4                                             | 375                   | 1.1%                                           |
| Nemaha       | 10                                            | 410                   | 2.4%                                           |
| Nuckolls     | 8                                             | 431                   | 1.9%                                           |
| Otoe         | 11                                            | 815                   | 1.3%                                           |
| Pawnee       | 10                                            | 460                   | 2.2%                                           |
| Pierce       | 7                                             | 625                   | 1.1%                                           |
| Platte       | 2                                             | 836                   | 0.2%                                           |
| Red Willow   | 1                                             | 333                   | 0.3%                                           |
| Richardson   | 15                                            | 708                   | 2.1%                                           |
| Rock         | 1                                             | 220                   | 0.5%                                           |
| Saline       | 15                                            | 717                   | 2.1%                                           |
| Sarpy        | 7                                             | 417                   | 1.7%                                           |
| Saunders     | 9                                             | 1,118                 | 0.8%                                           |
| Scotts Bluff | 15                                            | 760                   | 2.0%                                           |
| Seward       | 8                                             | 944                   | 0.8%                                           |
| Sheridan     | 5                                             | 525                   | 0.9%                                           |
| Sherman      | 11                                            | 384                   | 2.9%                                           |
| Stanton      | 7                                             | 571                   | 1.2%                                           |
| Thayer       | 1                                             | 414                   | 0.2%                                           |
| Thurston     | 7                                             | 309                   | 2.3%                                           |
| Valley       | 3                                             | 362                   | 0.8%                                           |
| Washington   | 6                                             | 747                   | 0.8%                                           |
| Wayne        | 11                                            | 485                   | 2.3%                                           |
| Webster      | 2                                             | 406                   | 0.5%                                           |
| York         | 5                                             | 521                   | 1.0%                                           |

\*Counties not listed in the table have no farms reporting an agroforestry practice in 2017.

Total number of Nebraska farms with an agroforestry practice: 458 Total number of Nebraska farms: 46,332

Percentage of Nebraska farms with an agroforestry practice: 1.0%

Data Source: USDA NASS Census of Agriculture 2017

Maps and table created by USDA National Agroforestry Center

# Agroforestry in Nevada based on the 2017 Census of Agriculture

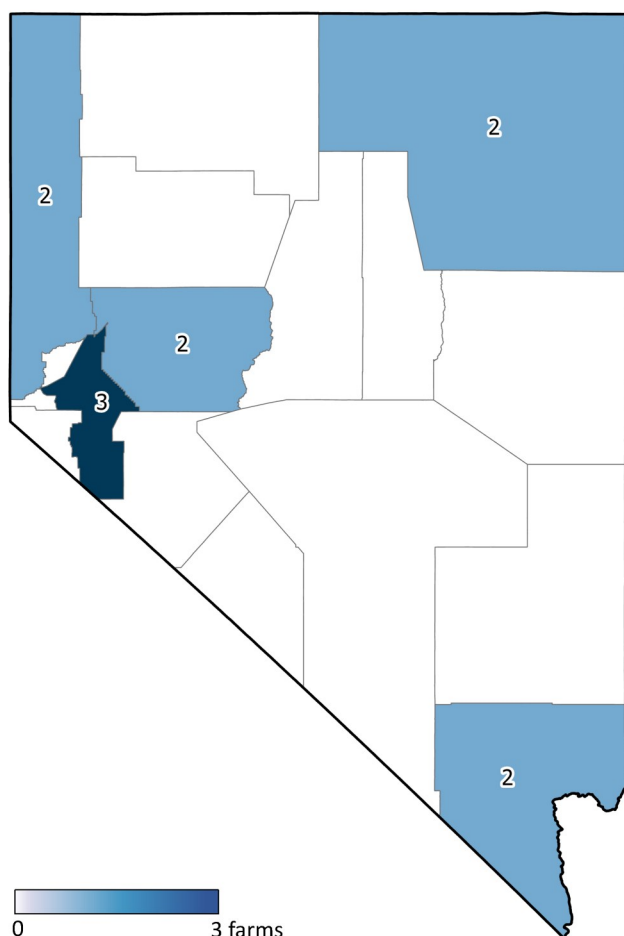

**Number of Nevada Farms Reporting an Agroforestry Practice in 2017**

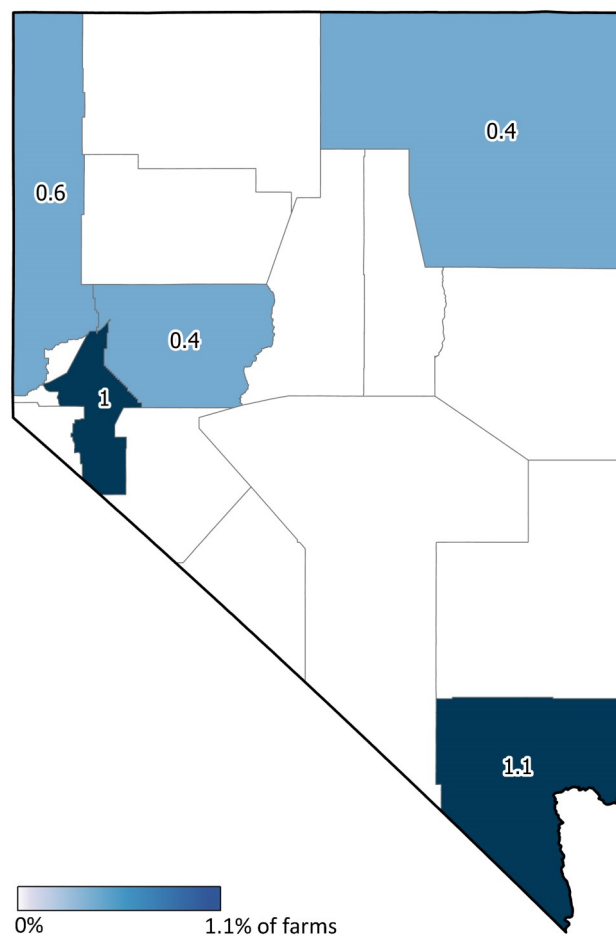

**Percentage of Nevada Farms Reporting an Agroforestry Practice in 2017**

| County*   | Number of Farms with an Agroforestry Practice | Total Number of Farms | Percent of Farms with an Agroforestry Practice |
|-----------|-----------------------------------------------|-----------------------|------------------------------------------------|
| Churchill | 2                                             | 504                   | 0.4%                                           |
| Clark     | 2                                             | 179                   | 1.1%                                           |
| Elko      | 2                                             | 526                   | 0.4%                                           |

| County* | Number of Farms with an Agroforestry Practice | Total Number of Farms | Percent of Farms with an Agroforestry Practice |
|---------|-----------------------------------------------|-----------------------|------------------------------------------------|
| Lyon    | 3                                             | 312                   | 1.0%                                           |
| Washoe  | 2                                             | 353                   | 0.6%                                           |

\*Counties not listed in the table have no farms reporting an agroforestry practice in 2017.

Total number of Nevada farms with an agroforestry practice: 11 Total number of Nevada farms: 3,423

Percentage of Nevada farms with an agroforestry practice: 0.3%

Data Source: USDA NASS Census of Agriculture 2017

Maps and table created by USDA National Agroforestry Center

# Agroforestry in New Hampshire based on the 2017 Census of Agriculture

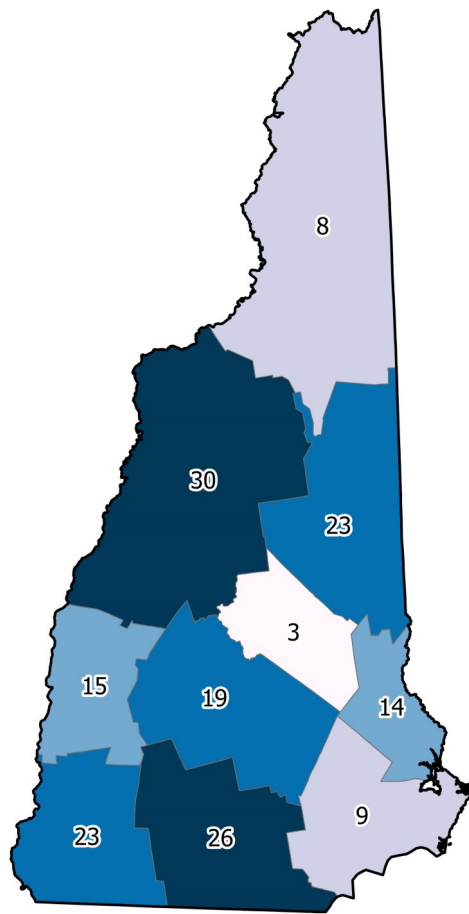

0 30 farms

**Number of New Hampshire Farms Reporting an Agroforestry Practice in 2017**

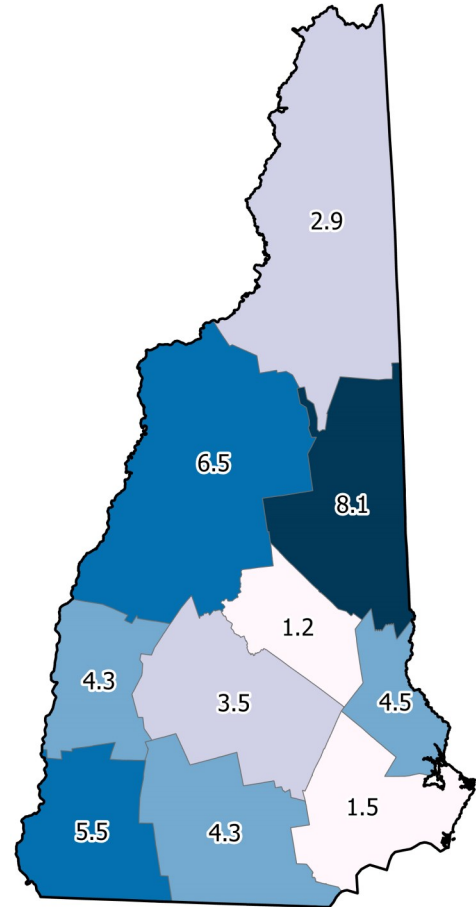

0% 8.1% of farms

**Percentage of New Hampshire Farms Reporting an Agroforestry Practice in 2017**

| County   | Number of Farms with an Agroforestry Practice | Total Number of Farms | Percent of Farms with an Agroforestry Practice |
|----------|-----------------------------------------------|-----------------------|------------------------------------------------|
| Belknap  | 3                                             | 256                   | 1.2%                                           |
| Carroll  | 23                                            | 285                   | 8.1%                                           |
| Cheshire | 23                                            | 420                   | 5.5%                                           |
| Coos     | 8                                             | 272                   | 2.9%                                           |
| Grafton  | 30                                            | 462                   | 6.5%                                           |

| County       | Number of Farms with an Agroforestry Practice | Total Number of Farms | Percent of Farms with an Agroforestry Practice |
|--------------|-----------------------------------------------|-----------------------|------------------------------------------------|
| Hillsborough | 26                                            | 605                   | 4.3%                                           |
| Merrimack    | 19                                            | 545                   | 3.5%                                           |
| Rockingham   | 9                                             | 618                   | 1.5%                                           |
| Strafford    | 14                                            | 310                   | 4.5%                                           |
| Sullivan     | 15                                            | 350                   | 4.3%                                           |

Total number of New Hampshire farms with an agroforestry practice: 170 Total number of New Hampshire farms: 4,123

Percentage of New Hampshire farms with an agroforestry practice: 4.1%

Data Source: USDA NASS Census of Agriculture 2017

Maps and table created by USDA National Agroforestry Center

# Agroforestry in New Jersey based on the 2017 Census of Agriculture

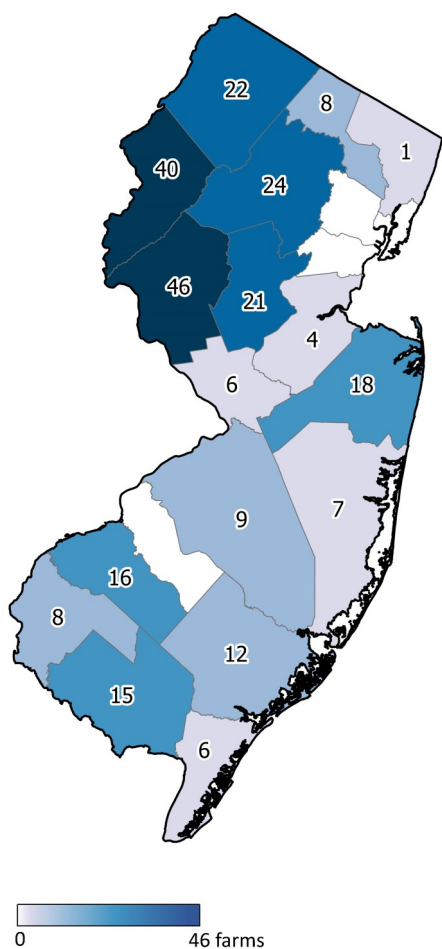

**Number of New Jersey Farms Reporting an Agroforestry Practice in 2017**

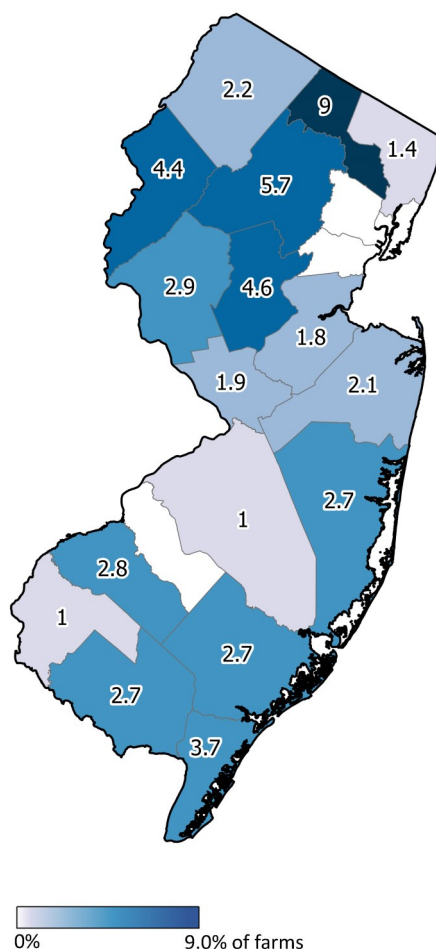

**Percentage of New Jersey Farms Reporting an Agroforestry Practice in 2017**

| County*    | Number of Farms with an Agroforestry Practice | Total Number of Farms | Percent of Farms with an Agroforestry Practice |
|------------|-----------------------------------------------|-----------------------|------------------------------------------------|
| Atlantic   | 12                                            | 450                   | 2.7%                                           |
| Bergen     | 1                                             | 74                    | 1.4%                                           |
| Burlington | 9                                             | 915                   | 1.0%                                           |
| Cape May   | 6                                             | 164                   | 3.7%                                           |
| Cumberland | 15                                            | 560                   | 2.7%                                           |
| Gloucester | 16                                            | 580                   | 2.8%                                           |
| Hunterdon  | 46                                            | 1,604                 | 2.9%                                           |
| Mercer     | 6                                             | 323                   | 1.9%                                           |
| Middlesex  | 4                                             | 217                   | 1.8%                                           |

| County*  | Number of Farms with an Agroforestry Practice | Total Number of Farms | Percent of Farms with an Agroforestry Practice |
|----------|-----------------------------------------------|-----------------------|------------------------------------------------|
| Monmouth | 18                                            | 838                   | 2.1%                                           |
| Morris   | 24                                            | 418                   | 5.7%                                           |
| Ocean    | 7                                             | 260                   | 2.7%                                           |
| Passaic  | 8                                             | 89                    | 9.0%                                           |
| Salem    | 8                                             | 781                   | 1.0%                                           |
| Somerset | 21                                            | 452                   | 4.6%                                           |
| Sussex   | 22                                            | 1,008                 | 2.2%                                           |
| Warren   | 40                                            | 918                   | 4.4%                                           |

\*Counties not listed in the table have no farms reporting an agroforestry practice in 2017.

**Total number of New Jersey farms with an agroforestry practice: 263 Total number of New Jersey farms: 9,883**

**Percentage of New Jersey farms with an agroforestry practice: 2.7%**

**Data Source: USDA NASS Census of Agriculture 2017**

**Maps and table created by USDA National Agroforestry Center**

# Agroforestry in New Mexico based on the 2017 Census of Agriculture

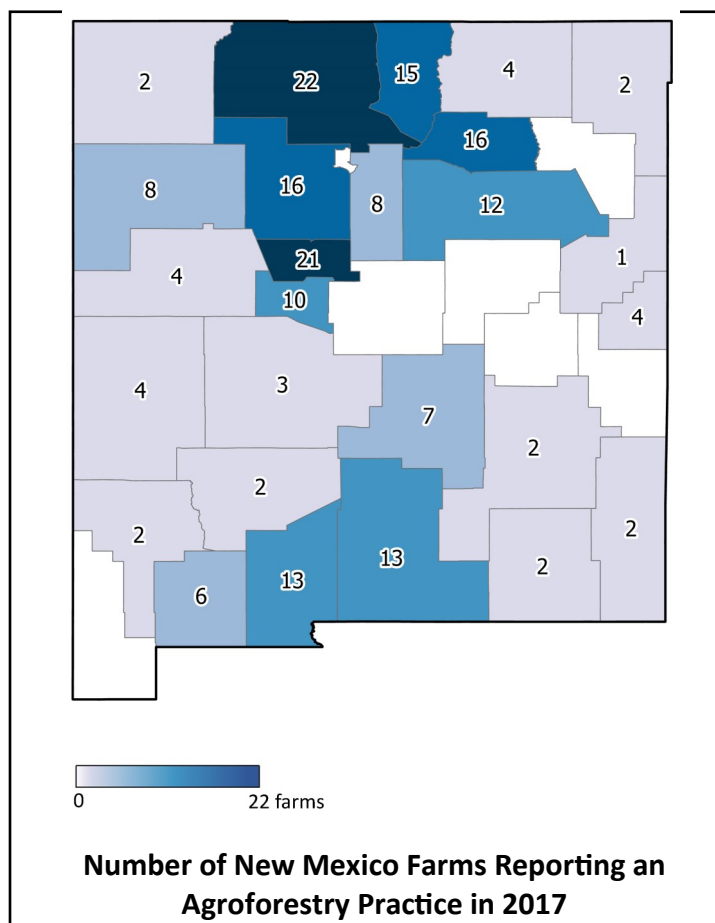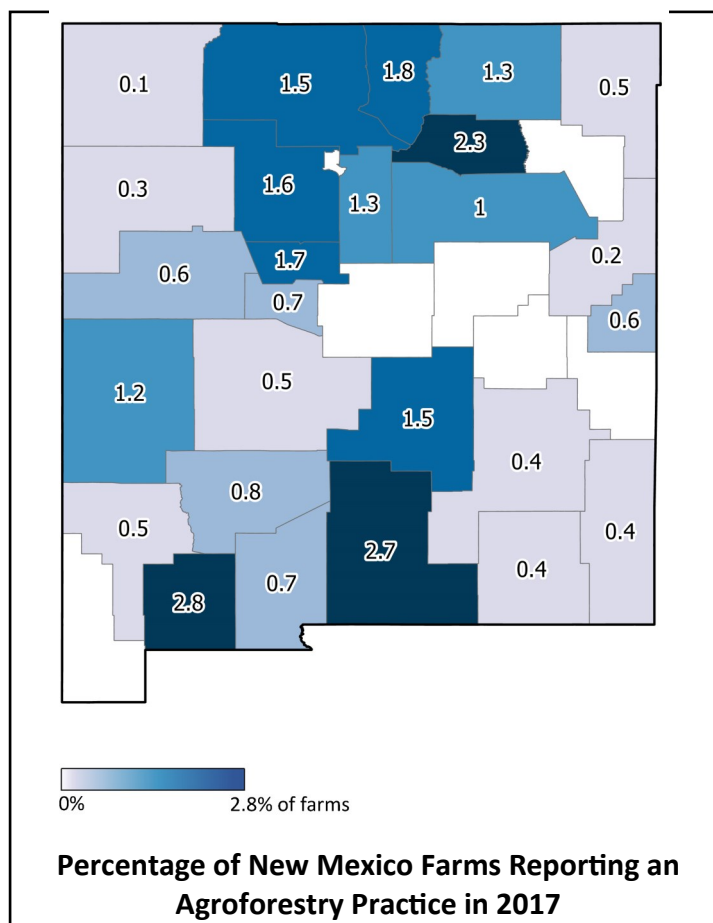

| County*    | Number of Farms with an Agroforestry Practice | Total Number of Farms | Percent of Farms with an Agroforestry Practice |
|------------|-----------------------------------------------|-----------------------|------------------------------------------------|
| Bernalillo | 21                                            | 1,248                 | 1.7%                                           |
| Catron     | 4                                             | 341                   | 1.2%                                           |
| Chaves     | 2                                             | 560                   | 0.4%                                           |
| Cibola     | 4                                             | 640                   | 0.6%                                           |
| Colfax     | 4                                             | 304                   | 1.3%                                           |
| Curry      | 4                                             | 641                   | 0.6%                                           |
| Dona Ana   | 13                                            | 1,946                 | 0.7%                                           |
| Eddy       | 2                                             | 507                   | 0.4%                                           |
| Grant      | 2                                             | 404                   | 0.5%                                           |
| Lea        | 2                                             | 555                   | 0.4%                                           |
| Lincoln    | 7                                             | 454                   | 1.5%                                           |
| Luna       | 6                                             | 211                   | 2.8%                                           |
| McKinley   | 8                                             | 2,441                 | 0.3%                                           |

| County*    | Number of Farms with an Agroforestry Practice | Total Number of Farms | Percent of Farms with an Agroforestry Practice |
|------------|-----------------------------------------------|-----------------------|------------------------------------------------|
| Mora       | 16                                            | 700                   | 2.3%                                           |
| Otero      | 13                                            | 473                   | 2.7%                                           |
| Quay       | 1                                             | 613                   | 0.2%                                           |
| Rio Arriba | 22                                            | 1,439                 | 1.5%                                           |
| San Juan   | 2                                             | 2,965                 | 0.1%                                           |
| San Miguel | 12                                            | 1,170                 | 1.0%                                           |
| Sandoval   | 16                                            | 1,007                 | 1.6%                                           |
| Santa Fe   | 8                                             | 639                   | 1.3%                                           |
| Sierra     | 2                                             | 257                   | 0.8%                                           |
| Socorro    | 3                                             | 658                   | 0.5%                                           |
| Taos       | 15                                            | 824                   | 1.8%                                           |
| Union      | 2                                             | 369                   | 0.5%                                           |
| Valencia   | 10                                            | 1,360                 | 0.7%                                           |

\*Counties not listed in the table have no farms reporting an agroforestry practice in 2017.

Total number of New Mexico farms with an agroforestry practice: 201 Total number of New Mexico farms: 25,044

Percentage of New Mexico farms with an agroforestry practice: 0.8%

Data Source: USDA NASS Census of Agriculture 2017

Maps and table created by USDA National Agroforestry Center

# Agroforestry in New York based on the 2017 Census of Agriculture

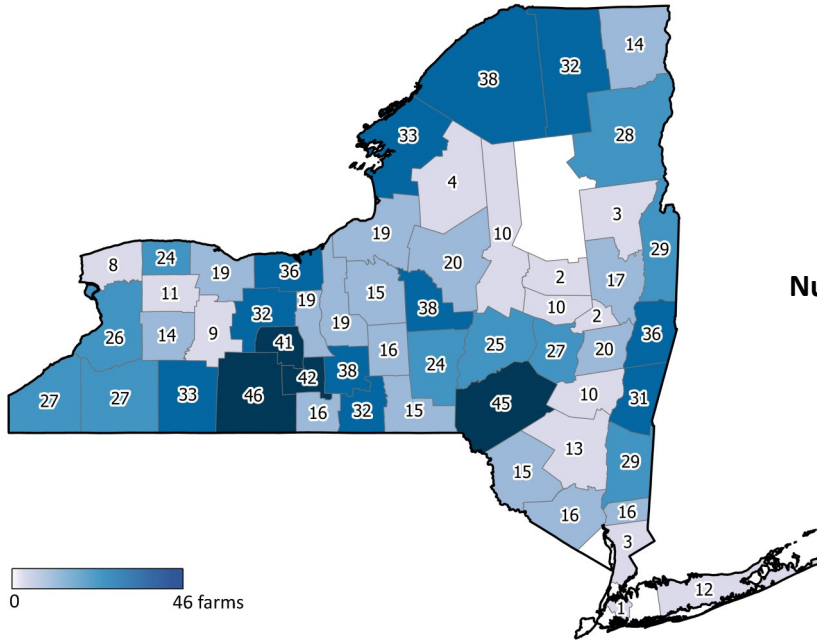

Number of New York Farms Reporting an Agroforestry Practice in 2017

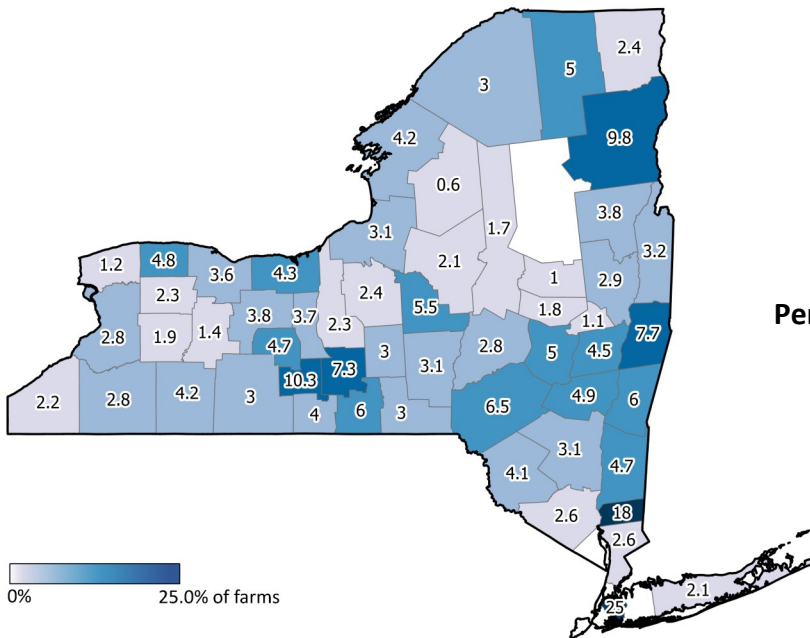

Percentage of New York Farms Reporting an Agroforestry Practice in 2017

| County*     | Number of Farms with an Agroforestry Practice | Total Number of Farms | Percent of Farms with an Agroforestry Practice |
|-------------|-----------------------------------------------|-----------------------|------------------------------------------------|
| Albany      | 20                                            | 440                   | 4.5%                                           |
| Allegany    | 33                                            | 789                   | 4.2%                                           |
| Broome      | 15                                            | 494                   | 3.0%                                           |
| Cattaraugus | 27                                            | 956                   | 2.8%                                           |
| Cayuga      | 19                                            | 842                   | 2.3%                                           |
| Chautauqua  | 27                                            | 1,228                 | 2.2%                                           |

| County*  | Number of Farms with an Agroforestry Practice | Total Number of Farms | Percent of Farms with an Agroforestry Practice |
|----------|-----------------------------------------------|-----------------------|------------------------------------------------|
| Chemung  | 16                                            | 398                   | 4.0%                                           |
| Chenango | 24                                            | 770                   | 3.1%                                           |
| Clinton  | 14                                            | 588                   | 2.4%                                           |
| Columbia | 31                                            | 518                   | 6.0%                                           |
| Cortland | 16                                            | 536                   | 3.0%                                           |
| Delaware | 45                                            | 689                   | 6.5%                                           |

## Agroforestry in New York based on the 2017 Census of Agriculture

| County*    | Number of Farms with an Agroforestry Practice | Total Number of Farms | Percent of Farms with an Agroforestry Practice |
|------------|-----------------------------------------------|-----------------------|------------------------------------------------|
| Dutchess   | 29                                            | 620                   | 4.7%                                           |
| Erie       | 26                                            | 940                   | 2.8%                                           |
| Essex      | 28                                            | 285                   | 9.8%                                           |
| Franklin   | 32                                            | 636                   | 5.0%                                           |
| Fulton     | 2                                             | 207                   | 1.0%                                           |
| Genesee    | 11                                            | 485                   | 2.3%                                           |
| Greene     | 10                                            | 206                   | 4.9%                                           |
| Herkimer   | 10                                            | 596                   | 1.7%                                           |
| Jefferson  | 33                                            | 792                   | 4.2%                                           |
| Lewis      | 4                                             | 625                   | 0.6%                                           |
| Livingston | 9                                             | 661                   | 1.4%                                           |
| Madison    | 38                                            | 691                   | 5.5%                                           |
| Monroe     | 19                                            | 527                   | 3.6%                                           |
| Montgomery | 10                                            | 564                   | 1.8%                                           |
| Niagara    | 8                                             | 690                   | 1.2%                                           |
| Oneida     | 20                                            | 967                   | 2.1%                                           |
| Onondaga   | 15                                            | 623                   | 2.4%                                           |
| Ontario    | 32                                            | 833                   | 3.8%                                           |
| Orange     | 16                                            | 621                   | 2.6%                                           |
| Orleans    | 24                                            | 498                   | 4.8%                                           |
| Oswego     | 19                                            | 612                   | 3.1%                                           |
| Otsego     | 25                                            | 880                   | 2.8%                                           |

| County*      | Number of Farms with an Agroforestry Practice | Total Number of Farms | Percent of Farms with an Agroforestry Practice |
|--------------|-----------------------------------------------|-----------------------|------------------------------------------------|
| Putnam       | 16                                            | 89                    | 18.0%                                          |
| Queens       | 1                                             | 4                     | 25.0%                                          |
| Rensselaer   | 36                                            | 470                   | 7.7%                                           |
| Saratoga     | 17                                            | 591                   | 2.9%                                           |
| Schenectady  | 2                                             | 185                   | 1.1%                                           |
| Schoharie    | 27                                            | 541                   | 5.0%                                           |
| Schuyler     | 42                                            | 408                   | 10.3%                                          |
| Seneca       | 19                                            | 516                   | 3.7%                                           |
| St. Lawrence | 38                                            | 1,253                 | 3.0%                                           |
| Steuben      | 46                                            | 1,542                 | 3.0%                                           |
| Suffolk      | 12                                            | 560                   | 2.1%                                           |
| Sullivan     | 15                                            | 366                   | 4.1%                                           |
| Tioga        | 32                                            | 535                   | 6.0%                                           |
| Tompkins     | 38                                            | 523                   | 7.3%                                           |
| Ulster       | 13                                            | 421                   | 3.1%                                           |
| Warren       | 3                                             | 80                    | 3.8%                                           |
| Washington   | 29                                            | 915                   | 3.2%                                           |
| Wayne        | 36                                            | 829                   | 4.3%                                           |
| Westchester  | 3                                             | 115                   | 2.6%                                           |
| Wyoming      | 14                                            | 729                   | 1.9%                                           |
| Yates        | 41                                            | 867                   | 4.7%                                           |

\*Counties not listed in the table have no farms reporting an agroforestry practice in 2017.

**Total number of New York farms with an agroforestry practice: 1,187    Total number of New York farms: 33,438**

**Percentage of New York farms with an agroforestry practice: 3.5%**

**Data Source: USDA NASS Census of Agriculture 2017**

**Maps and table created by USDA National Agroforestry Center**

# Agroforestry in North Carolina based on the 2017 Census of Agriculture

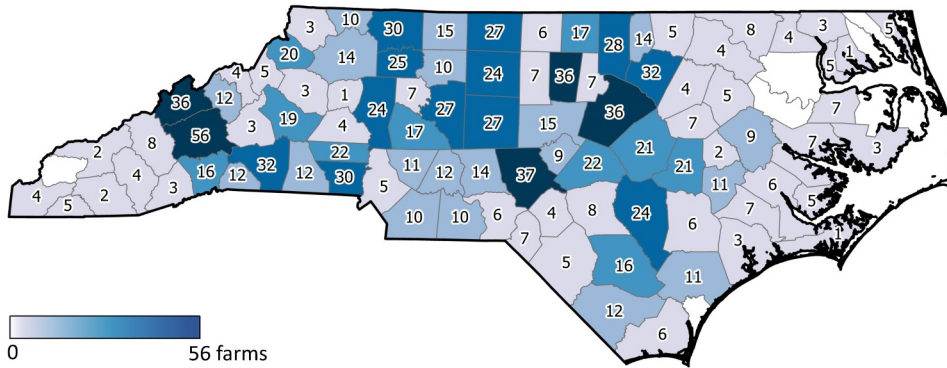

Number of North Carolina Farms Reporting an Agroforestry Practice in 2017

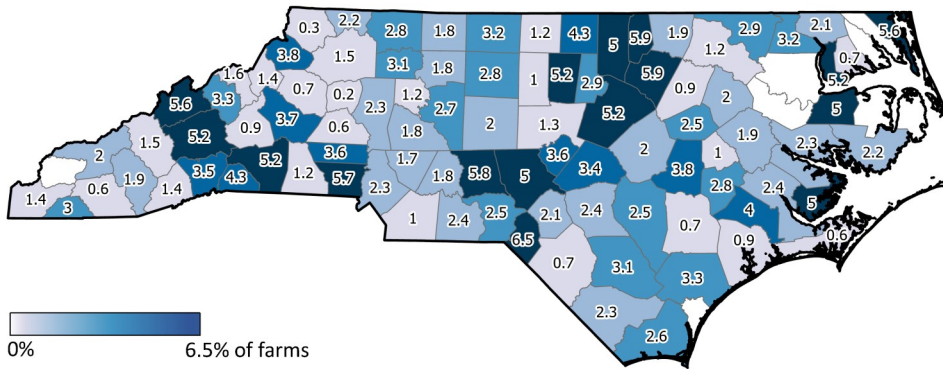

Percentage of North Carolina Farms Reporting an Agroforestry Practice in 2017

| County*   | Number of Farms with an Agroforestry Practice | Total Number of Farms | Percent of Farms with an Agroforestry Practice |
|-----------|-----------------------------------------------|-----------------------|------------------------------------------------|
| Alamance  | 7                                             | 720                   | 1.0%                                           |
| Alexander | 1                                             | 544                   | 0.2%                                           |
| Alleghany | 10                                            | 448                   | 2.2%                                           |
| Anson     | 10                                            | 412                   | 2.4%                                           |
| Ashe      | 3                                             | 864                   | 0.3%                                           |
| Avery     | 5                                             | 351                   | 1.4%                                           |
| Beaufort  | 7                                             | 310                   | 2.3%                                           |
| Bladen    | 16                                            | 512                   | 3.1%                                           |
| Brunswick | 6                                             | 231                   | 2.6%                                           |
| Buncombe  | 56                                            | 1,073                 | 5.2%                                           |
| Burke     | 19                                            | 508                   | 3.7%                                           |
| Cabarrus  | 11                                            | 629                   | 1.7%                                           |
| Caldwell  | 3                                             | 411                   | 0.7%                                           |
| Carteret  | 1                                             | 158                   | 0.6%                                           |

| County*    | Number of Farms with an Agroforestry Practice | Total Number of Farms | Percent of Farms with an Agroforestry Practice |
|------------|-----------------------------------------------|-----------------------|------------------------------------------------|
| Caswell    | 6                                             | 493                   | 1.2%                                           |
| Catawba    | 4                                             | 638                   | 0.6%                                           |
| Chatham    | 15                                            | 1,116                 | 1.3%                                           |
| Cherokee   | 4                                             | 277                   | 1.4%                                           |
| Chowan     | 5                                             | 97                    | 5.2%                                           |
| Clay       | 5                                             | 164                   | 3.0%                                           |
| Cleveland  | 12                                            | 1,005                 | 1.2%                                           |
| Columbus   | 12                                            | 514                   | 2.3%                                           |
| Craven     | 6                                             | 245                   | 2.4%                                           |
| Cumberland | 8                                             | 336                   | 2.4%                                           |
| Currituck  | 5                                             | 89                    | 5.6%                                           |
| Davidson   | 27                                            | 1,003                 | 2.7%                                           |
| Davie      | 7                                             | 591                   | 1.2%                                           |
| Duplin     | 6                                             | 820                   | 0.7%                                           |

## Agroforestry in North Carolina based on the 2017 Census of Agriculture

| County*     | Number of Farms with an Agroforestry Practice | Total Number of Farms | Percent of Farms with an Agroforestry Practice |
|-------------|-----------------------------------------------|-----------------------|------------------------------------------------|
| Durham      | 7                                             | 241                   | 2.9%                                           |
| Edgecombe   | 5                                             | 249                   | 2.0%                                           |
| Forsyth     | 10                                            | 557                   | 1.8%                                           |
| Franklin    | 32                                            | 538                   | 5.9%                                           |
| Gaston      | 30                                            | 522                   | 5.7%                                           |
| Gates       | 3                                             | 141                   | 2.1%                                           |
| Granville   | 28                                            | 557                   | 5.0%                                           |
| Greene      | 2                                             | 207                   | 1.0%                                           |
| Guilford    | 24                                            | 854                   | 2.8%                                           |
| Halifax     | 4                                             | 336                   | 1.2%                                           |
| Harnett     | 22                                            | 643                   | 3.4%                                           |
| Haywood     | 8                                             | 541                   | 1.5%                                           |
| Henderson   | 16                                            | 455                   | 3.5%                                           |
| Hertford    | 4                                             | 126                   | 3.2%                                           |
| Hoke        | 4                                             | 189                   | 2.1%                                           |
| Hyde        | 3                                             | 138                   | 2.2%                                           |
| Iredell     | 24                                            | 1,055                 | 2.3%                                           |
| Jackson     | 4                                             | 215                   | 1.9%                                           |
| Johnston    | 21                                            | 1063                  | 2.0%                                           |
| Jones       | 7                                             | 177                   | 4.0%                                           |
| Lee         | 9                                             | 250                   | 3.6%                                           |
| Lenoir      | 11                                            | 386                   | 2.8%                                           |
| Lincoln     | 22                                            | 614                   | 3.6%                                           |
| Macon       | 2                                             | 340                   | 0.6%                                           |
| Madison     | 36                                            | 639                   | 5.6%                                           |
| McDowell    | 3                                             | 333                   | 0.9%                                           |
| Mecklenburg | 5                                             | 216                   | 2.3%                                           |
| Mitchell    | 4                                             | 250                   | 1.6%                                           |
| Montgomery  | 14                                            | 240                   | 5.8%                                           |
| Moore       | 37                                            | 733                   | 5.0%                                           |
| Nash        | 4                                             | 425                   | 0.9%                                           |
| Northampton | 8                                             | 272                   | 2.9%                                           |

| County*      | Number of Farms with an Agroforestry Practice | Total Number of Farms | Percent of Farms with an Agroforestry Practice |
|--------------|-----------------------------------------------|-----------------------|------------------------------------------------|
| Onslow       | 3                                             | 340                   | 0.9%                                           |
| Orange       | 36                                            | 686                   | 5.2%                                           |
| Pamlico      | 5                                             | 100                   | 5.0%                                           |
| Pender       | 11                                            | 336                   | 3.3%                                           |
| Perquimans   | 1                                             | 149                   | 0.7%                                           |
| Person       | 17                                            | 393                   | 4.3%                                           |
| Pitt         | 9                                             | 478                   | 1.9%                                           |
| Polk         | 12                                            | 281                   | 4.3%                                           |
| Randolph     | 27                                            | 1,368                 | 2.0%                                           |
| Richmond     | 6                                             | 237                   | 2.5%                                           |
| Robeson      | 5                                             | 722                   | 0.7%                                           |
| Rockingham   | 27                                            | 844                   | 3.2%                                           |
| Rowan        | 17                                            | 925                   | 1.8%                                           |
| Rutherford   | 32                                            | 620                   | 5.2%                                           |
| Sampson      | 24                                            | 960                   | 2.5%                                           |
| Scotland     | 7                                             | 108                   | 6.5%                                           |
| Stanly       | 12                                            | 672                   | 1.8%                                           |
| Stokes       | 15                                            | 856                   | 1.8%                                           |
| Surry        | 30                                            | 1,064                 | 2.8%                                           |
| Swain        | 2                                             | 99                    | 2.0%                                           |
| Transylvania | 3                                             | 215                   | 1.4%                                           |
| Union        | 10                                            | 957                   | 1.0%                                           |
| Vance        | 14                                            | 238                   | 5.9%                                           |
| Wake         | 36                                            | 691                   | 5.2%                                           |
| Warren       | 5                                             | 267                   | 1.9%                                           |
| Washington   | 7                                             | 141                   | 5.0%                                           |
| Watauga      | 20                                            | 520                   | 3.8%                                           |
| Wayne        | 21                                            | 551                   | 3.8%                                           |
| Wilkes       | 14                                            | 932                   | 1.5%                                           |
| Wilson       | 7                                             | 276                   | 2.5%                                           |
| Yadkin       | 25                                            | 818                   | 3.1%                                           |
| Yancey       | 12                                            | 369                   | 3.3%                                           |

\*Counties not listed in the table have no farms reporting an agroforestry practice in 2017.

Total number of North Carolina farms with an agroforestry practice: 1,162 Total number of North Carolina farms: 46,418

Percentage of North Carolina farms with an agroforestry practice: 2.5%

Data Source: USDA NASS Census of Agriculture 2017

Maps and table created by USDA National Agroforestry Center

# Agroforestry in North Dakota based on the 2017 Census of Agriculture

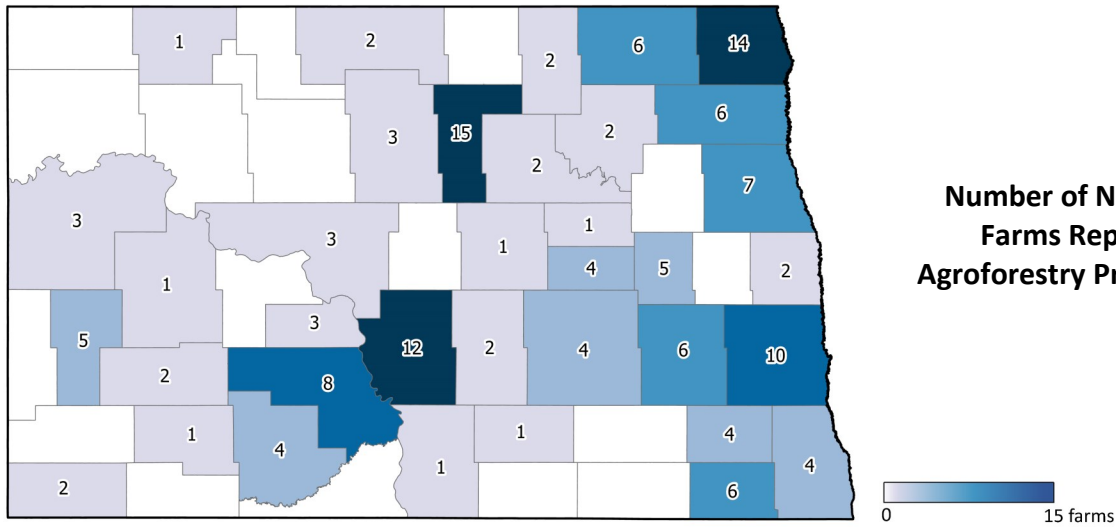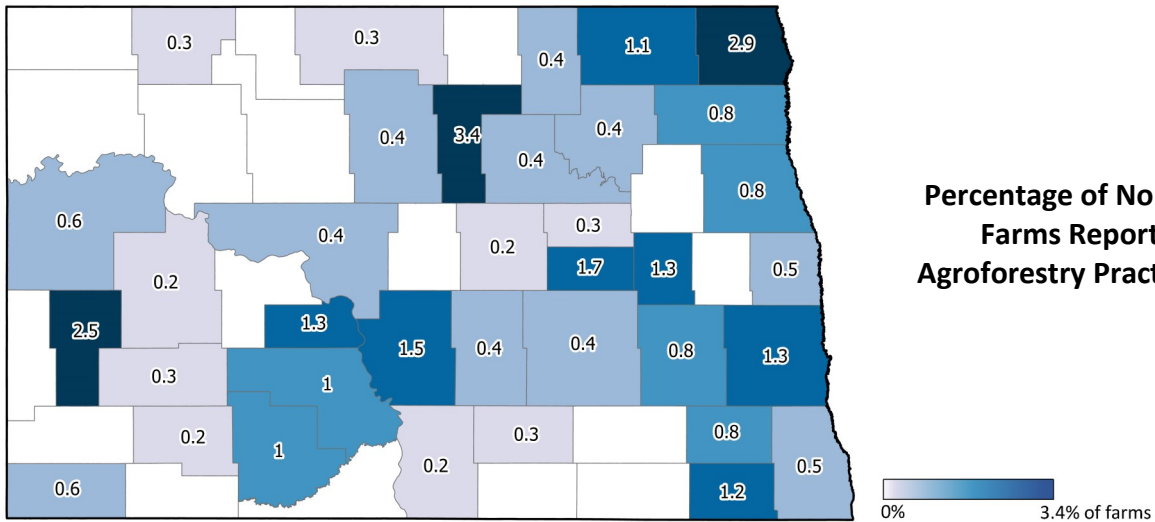

| County*   | Number of Farms with an Agroforestry Practice | Total Number of Farms | Percent of Farms with an Agroforestry Practice |
|-----------|-----------------------------------------------|-----------------------|------------------------------------------------|
| Barnes    | 6                                             | 749                   | 0.8%                                           |
| Benson    | 2                                             | 473                   | 0.4%                                           |
| Billings  | 5                                             | 204                   | 2.5%                                           |
| Bottineau | 2                                             | 684                   | 0.3%                                           |
| Bowman    | 2                                             | 341                   | 0.6%                                           |
| Burke     | 1                                             | 356                   | 0.3%                                           |
| Burleigh  | 12                                            | 785                   | 1.5%                                           |
| Cass      | 10                                            | 784                   | 1.3%                                           |
| Cavalier  | 6                                             | 523                   | 1.1%                                           |

| County*     | Number of Farms with an Agroforestry Practice | Total Number of Farms | Percent of Farms with an Agroforestry Practice |
|-------------|-----------------------------------------------|-----------------------|------------------------------------------------|
| Dunn        | 1                                             | 524                   | 0.2%                                           |
| Eddy        | 1                                             | 291                   | 0.3%                                           |
| Emmons      | 1                                             | 516                   | 0.2%                                           |
| Foster      | 4                                             | 230                   | 1.7%                                           |
| Grand Forks | 7                                             | 889                   | 0.8%                                           |
| Grant       | 4                                             | 412                   | 1.0%                                           |
| Griggs      | 5                                             | 393                   | 1.3%                                           |
| Hettinger   | 1                                             | 482                   | 0.2%                                           |
| Kidder      | 2                                             | 476                   | 0.4%                                           |

## Agroforestry in North Dakota based on the 2017 Census of Agriculture

| County*  | Number of Farms with an Agroforestry Practice | Total Number of Farms | Percent of Farms with an Agroforestry Practice |
|----------|-----------------------------------------------|-----------------------|------------------------------------------------|
| Logan    | 1                                             | 351                   | 0.3%                                           |
| McHenry  | 3                                             | 750                   | 0.4%                                           |
| McKenzie | 3                                             | 539                   | 0.6%                                           |
| McLean   | 3                                             | 762                   | 0.4%                                           |
| Morton   | 8                                             | 781                   | 1.0%                                           |
| Oliver   | 3                                             | 234                   | 1.3%                                           |
| Pembina  | 14                                            | 481                   | 2.9%                                           |
| Pierce   | 15                                            | 446                   | 3.4%                                           |
| Ramsey   | 2                                             | 515                   | 0.4%                                           |

| County*  | Number of Farms with an Agroforestry Practice | Total Number of Farms | Percent of Farms with an Agroforestry Practice |
|----------|-----------------------------------------------|-----------------------|------------------------------------------------|
| Ransom   | 4                                             | 507                   | 0.8%                                           |
| Richland | 4                                             | 846                   | 0.5%                                           |
| Sargent  | 6                                             | 501                   | 1.2%                                           |
| Stark    | 2                                             | 678                   | 0.3%                                           |
| Stutsman | 4                                             | 939                   | 0.4%                                           |
| Towner   | 2                                             | 454                   | 0.4%                                           |
| Traill   | 2                                             | 415                   | 0.5%                                           |
| Walsh    | 6                                             | 763                   | 0.8%                                           |
| Wells    | 1                                             | 435                   | 0.2%                                           |

\*Counties not listed in the table have no farms reporting an agroforestry practice in 2017.

**Total number of North Dakota farms with an agroforestry practice: 155    Total number of North Dakota farms: 26,364**

**Percentage of North Dakota farms with an agroforestry practice: 0.6%**

**Data Source: USDA NASS Census of Agriculture 2017**

**Maps and table created by USDA National Agroforestry Center**

# Agroforestry in Ohio based on the 2017 Census of Agriculture

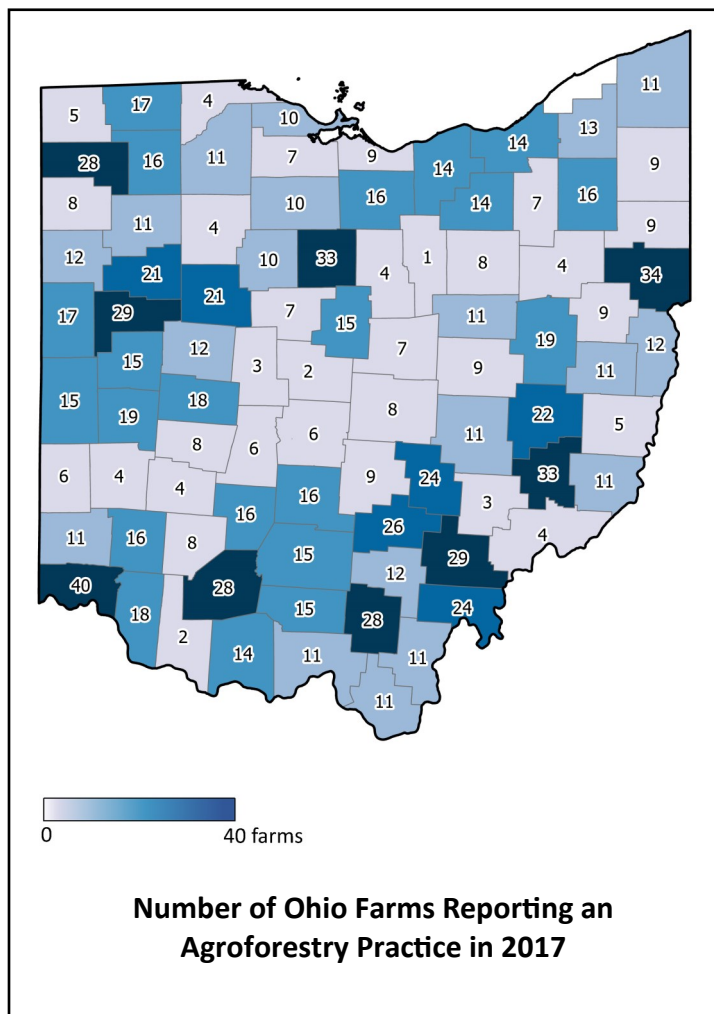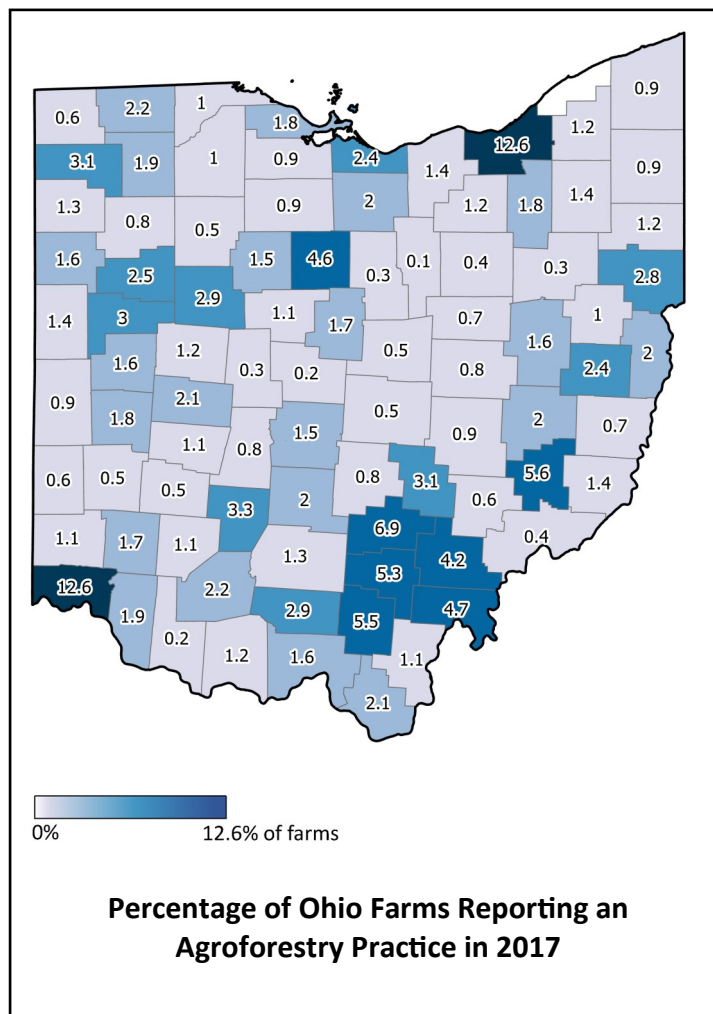

| County*    | Number of Farms with an Agroforestry Practice | Total Number of Farms | Percent of Farms with an Agroforestry Practice |
|------------|-----------------------------------------------|-----------------------|------------------------------------------------|
| Adams      | 14                                            | 1,194                 | 1.2%                                           |
| Allen      | 21                                            | 855                   | 2.5%                                           |
| Ashland    | 1                                             | 1,122                 | 0.1%                                           |
| Ashtabula  | 11                                            | 1,212                 | 0.9%                                           |
| Athens     | 29                                            | 687                   | 4.2%                                           |
| Auglaize   | 29                                            | 976                   | 3.0%                                           |
| Belmont    | 5                                             | 750                   | 0.7%                                           |
| Brown      | 2                                             | 1,237                 | 0.2%                                           |
| Butler     | 11                                            | 997                   | 1.1%                                           |
| Carroll    | 9                                             | 888                   | 1.0%                                           |
| Champaign  | 18                                            | 860                   | 2.1%                                           |
| Clark      | 8                                             | 742                   | 1.1%                                           |
| Clermont   | 18                                            | 928                   | 1.9%                                           |
| Clinton    | 8                                             | 747                   | 1.1%                                           |
| Columbiana | 34                                            | 1,227                 | 2.8%                                           |
| Coshocton  | 9                                             | 1,191                 | 0.8%                                           |

| County*   | Number of Farms with an Agroforestry Practice | Total Number of Farms | Percent of Farms with an Agroforestry Practice |
|-----------|-----------------------------------------------|-----------------------|------------------------------------------------|
| Crawford  | 33                                            | 719                   | 4.6%                                           |
| Cuyahoga  | 14                                            | 111                   | 12.6%                                          |
| Darke     | 15                                            | 1,658                 | 0.9%                                           |
| Defiance  | 28                                            | 907                   | 3.1%                                           |
| Delaware  | 2                                             | 803                   | 0.2%                                           |
| Erie      | 9                                             | 382                   | 2.4%                                           |
| Fairfield | 9                                             | 1,117                 | 0.8%                                           |
| Fayette   | 16                                            | 491                   | 3.3%                                           |
| Franklin  | 6                                             | 408                   | 1.5%                                           |
| Fulton    | 17                                            | 785                   | 2.2%                                           |
| Gallia    | 11                                            | 990                   | 1.1%                                           |
| Geauga    | 13                                            | 1,049                 | 1.2%                                           |
| Greene    | 4                                             | 817                   | 0.5%                                           |
| Guernsey  | 22                                            | 1,103                 | 2.0%                                           |
| Hamilton  | 40                                            | 318                   | 12.6%                                          |
| Hancock   | 4                                             | 887                   | 0.5%                                           |

## Agroforestry in Ohio based on the 2017 Census of Agriculture

| County*    | Number of Farms with an Agroforestry Practice | Total Number of Farms | Percent of Farms with an Agroforestry Practice |
|------------|-----------------------------------------------|-----------------------|------------------------------------------------|
| Hardin     | 21                                            | 726                   | 2.9%                                           |
| Harrison   | 11                                            | 458                   | 2.4%                                           |
| Henry      | 16                                            | 841                   | 1.9%                                           |
| Highland   | 28                                            | 1,254                 | 2.2%                                           |
| Hocking    | 26                                            | 377                   | 6.9%                                           |
| Holmes     | 11                                            | 1,673                 | 0.7%                                           |
| Huron      | 16                                            | 810                   | 2.0%                                           |
| Jackson    | 28                                            | 508                   | 5.5%                                           |
| Jefferson  | 12                                            | 599                   | 2.0%                                           |
| Knox       | 7                                             | 1,338                 | 0.5%                                           |
| Lawrence   | 11                                            | 531                   | 2.1%                                           |
| Licking    | 8                                             | 1,583                 | 0.5%                                           |
| Logan      | 12                                            | 1,009                 | 1.2%                                           |
| Lorain     | 14                                            | 1,001                 | 1.4%                                           |
| Lucas      | 4                                             | 386                   | 1.0%                                           |
| Madison    | 6                                             | 789                   | 0.8%                                           |
| Mahoning   | 9                                             | 774                   | 1.2%                                           |
| Marion     | 7                                             | 615                   | 1.1%                                           |
| Medina     | 14                                            | 1,149                 | 1.2%                                           |
| Meigs      | 24                                            | 515                   | 4.7%                                           |
| Mercer     | 17                                            | 1,231                 | 1.4%                                           |
| Miami      | 19                                            | 1,037                 | 1.8%                                           |
| Monroe     | 11                                            | 808                   | 1.4%                                           |
| Montgomery | 4                                             | 781                   | 0.5%                                           |
| Morgan     | 3                                             | 530                   | 0.6%                                           |
| Morrow     | 15                                            | 865                   | 1.7%                                           |
| Muskingum  | 11                                            | 1,263                 | 0.9%                                           |
| Noble      | 33                                            | 593                   | 5.6%                                           |

| County*    | Number of Farms with an Agroforestry Practice | Total Number of Farms | Percent of Farms with an Agroforestry Practice |
|------------|-----------------------------------------------|-----------------------|------------------------------------------------|
| Ottawa     | 10                                            | 551                   | 1.8%                                           |
| Paulding   | 8                                             | 622                   | 1.3%                                           |
| Perry      | 24                                            | 762                   | 3.1%                                           |
| Pickaway   | 16                                            | 805                   | 2.0%                                           |
| Pike       | 15                                            | 511                   | 2.9%                                           |
| Portage    | 16                                            | 1,118                 | 1.4%                                           |
| Preble     | 6                                             | 1,055                 | 0.6%                                           |
| Putnam     | 11                                            | 1,335                 | 0.8%                                           |
| Richland   | 4                                             | 1,160                 | 0.3%                                           |
| Ross       | 15                                            | 1,121                 | 1.3%                                           |
| Sandusky   | 7                                             | 768                   | 0.9%                                           |
| Scioto     | 11                                            | 688                   | 1.6%                                           |
| Seneca     | 10                                            | 1,156                 | 0.9%                                           |
| Shelby     | 15                                            | 947                   | 1.6%                                           |
| Stark      | 4                                             | 1,547                 | 0.3%                                           |
| Summit     | 7                                             | 392                   | 1.8%                                           |
| Trumbull   | 9                                             | 1,036                 | 0.9%                                           |
| Tuscarawas | 19                                            | 1,155                 | 1.6%                                           |
| Union      | 3                                             | 997                   | 0.3%                                           |
| Van Wert   | 12                                            | 772                   | 1.6%                                           |
| Vinton     | 12                                            | 227                   | 5.3%                                           |
| Warren     | 16                                            | 925                   | 1.7%                                           |
| Washington | 4                                             | 1,106                 | 0.4%                                           |
| Wayne      | 8                                             | 2,034                 | 0.4%                                           |
| Williams   | 5                                             | 881                   | 0.6%                                           |
| Wood       | 11                                            | 1,069                 | 1.0%                                           |
| Wyandot    | 10                                            | 649                   | 1.5%                                           |

\*Counties not listed in the table have no farms reporting an agroforestry practice in 2017.

Total number of Ohio farms with an agroforestry practice: 1,156 Total number of Ohio farms: 77,805

Percentage of Ohio farms with an agroforestry practice: 1.5%

Data Source: USDA NASS Census of Agriculture 2017

Maps and table created by USDA National Agroforestry Center

# Agroforestry in Oklahoma based on the 2017 Census of Agriculture

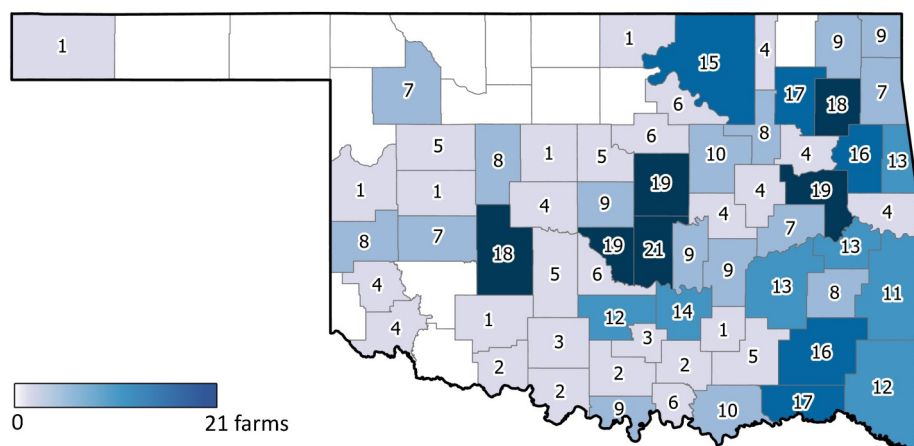

Number of Oklahoma Farms Reporting an Agroforestry Practice in 2017

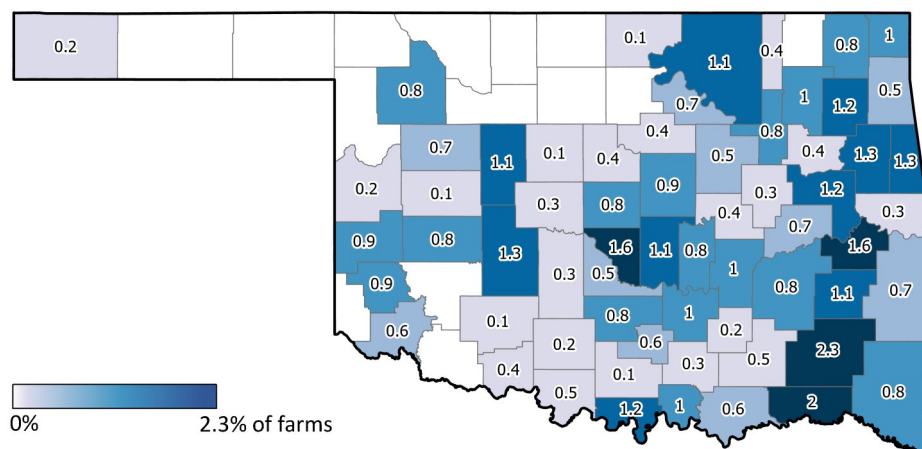

Percentage of Oklahoma Farms Reporting an Agroforestry Practice in 2017

| County*   | Number of Farms with an Agroforestry Practice | Total Number of Farms | Percent of Farms with an Agroforestry Practice |
|-----------|-----------------------------------------------|-----------------------|------------------------------------------------|
| Adair     | 13                                            | 1,031                 | 1.3%                                           |
| Atoka     | 5                                             | 1,057                 | 0.5%                                           |
| Beckham   | 8                                             | 896                   | 0.9%                                           |
| Blaine    | 8                                             | 731                   | 1.1%                                           |
| Bryan     | 10                                            | 1,609                 | 0.6%                                           |
| Caddo     | 18                                            | 1,396                 | 1.3%                                           |
| Canadian  | 4                                             | 1,324                 | 0.3%                                           |
| Carter    | 2                                             | 1,431                 | 0.1%                                           |
| Cherokee  | 16                                            | 1,200                 | 1.3%                                           |
| Choctaw   | 17                                            | 851                   | 2.0%                                           |
| Cimarron  | 1                                             | 447                   | 0.2%                                           |
| Cleveland | 19                                            | 1,182                 | 1.6%                                           |
| Coal      | 1                                             | 590                   | 0.2%                                           |

| County*  | Number of Farms with an Agroforestry Practice | Total Number of Farms | Percent of Farms with an Agroforestry Practice |
|----------|-----------------------------------------------|-----------------------|------------------------------------------------|
| Comanche | 1                                             | 1,055                 | 0.1%                                           |
| Cotton   | 2                                             | 448                   | 0.4%                                           |
| Craig    | 9                                             | 1,179                 | 0.8%                                           |
| Creek    | 10                                            | 1,893                 | 0.5%                                           |
| Custer   | 1                                             | 773                   | 0.1%                                           |
| Delaware | 7                                             | 1,377                 | 0.5%                                           |
| Dewey    | 5                                             | 728                   | 0.7%                                           |
| Garvin   | 12                                            | 1,500                 | 0.8%                                           |
| Grady    | 5                                             | 1,625                 | 0.3%                                           |
| Greer    | 4                                             | 432                   | 0.9%                                           |
| Haskell  | 13                                            | 812                   | 1.6%                                           |
| Hughes   | 9                                             | 928                   | 1.0%                                           |
| Jackson  | 4                                             | 634                   | 0.6%                                           |

## Agroforestry in Oklahoma based on the 2017 Census of Agriculture

| County*    | Number of Farms with an Agroforestry Practice | Total Number of Farms | Percent of Farms with an Agroforestry Practice |
|------------|-----------------------------------------------|-----------------------|------------------------------------------------|
| Jefferson  | 2                                             | 424                   | 0.5%                                           |
| Johnston   | 2                                             | 606                   | 0.3%                                           |
| Kay        | 1                                             | 864                   | 0.1%                                           |
| Kingfisher | 1                                             | 928                   | 0.1%                                           |
| Latimer    | 8                                             | 707                   | 1.1%                                           |
| Le Flore   | 11                                            | 1,672                 | 0.7%                                           |
| Lincoln    | 19                                            | 2,231                 | 0.9%                                           |
| Logan      | 5                                             | 1,262                 | 0.4%                                           |
| Love       | 9                                             | 725                   | 1.2%                                           |
| Marshall   | 6                                             | 588                   | 1.0%                                           |
| Mayes      | 18                                            | 1,552                 | 1.2%                                           |
| McClain    | 6                                             | 1,296                 | 0.5%                                           |
| McCurtain  | 12                                            | 1,479                 | 0.8%                                           |
| McIntosh   | 7                                             | 1,013                 | 0.7%                                           |
| Murray     | 3                                             | 473                   | 0.6%                                           |
| Muskogee   | 19                                            | 1,586                 | 1.2%                                           |
| Okfuskee   | 4                                             | 934                   | 0.4%                                           |
| Oklahoma   | 9                                             | 1,103                 | 0.8%                                           |
| Okmulgee   | 4                                             | 1,404                 | 0.3%                                           |

| County*      | Number of Farms with an Agroforestry Practice | Total Number of Farms | Percent of Farms with an Agroforestry Practice |
|--------------|-----------------------------------------------|-----------------------|------------------------------------------------|
| Osage        | 15                                            | 1,395                 | 1.1%                                           |
| Ottawa       | 9                                             | 947                   | 1.0%                                           |
| Pawnee       | 6                                             | 818                   | 0.7%                                           |
| Payne        | 6                                             | 1,541                 | 0.4%                                           |
| Pittsburg    | 13                                            | 1,623                 | 0.8%                                           |
| Pontotoc     | 14                                            | 1,438                 | 1.0%                                           |
| Pottawatomie | 21                                            | 1,856                 | 1.1%                                           |
| Pushmataha   | 16                                            | 695                   | 2.3%                                           |
| Roger Mills  | 1                                             | 612                   | 0.2%                                           |
| Rogers       | 17                                            | 1,776                 | 1.0%                                           |
| Seminole     | 9                                             | 1,143                 | 0.8%                                           |
| Sequoyah     | 4                                             | 1,205                 | 0.3%                                           |
| Stephens     | 3                                             | 1,226                 | 0.2%                                           |
| Tulsa        | 8                                             | 1,053                 | 0.8%                                           |
| Wagoner      | 4                                             | 1,059                 | 0.4%                                           |
| Washington   | 4                                             | 899                   | 0.4%                                           |
| Washita      | 7                                             | 864                   | 0.8%                                           |
| Woodward     | 7                                             | 843                   | 0.8%                                           |

\*Counties not listed in the table have no farms reporting an agroforestry practice in 2017.

**Total number of Oklahoma farms with an agroforestry practice: 514    Total number of Oklahoma farms: 78,531**

**Percentage of Oklahoma farms with an agroforestry practice: 0.7%**

**Data Source: USDA NASS Census of Agriculture 2017**

**Maps and table created by USDA National Agroforestry Center**

# Agroforestry in Oregon based on the 2017 Census of Agriculture

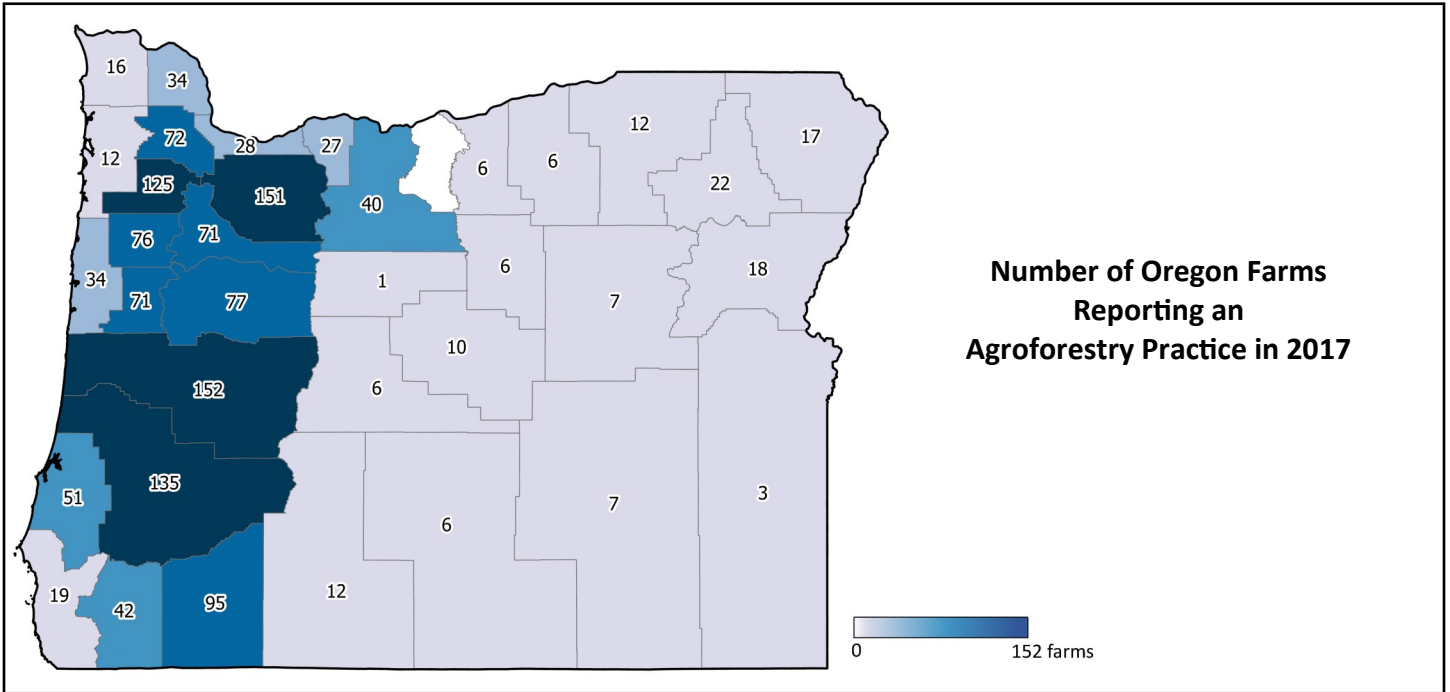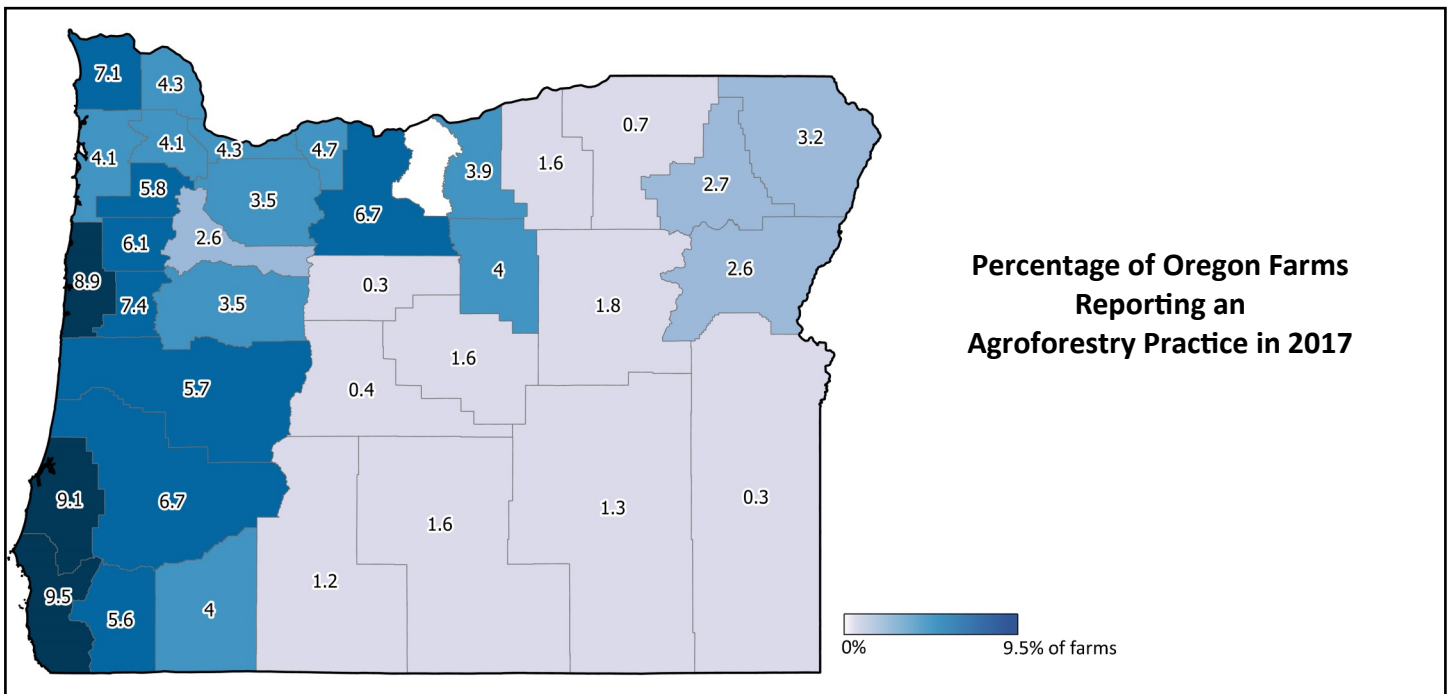

| County*   | Number of Farms with an Agroforestry Practice | Total Number of Farms | Percent of Farms with an Agroforestry Practice |
|-----------|-----------------------------------------------|-----------------------|------------------------------------------------|
| Baker     | 18                                            | 705                   | 2.6%                                           |
| Benton    | 71                                            | 964                   | 7.4%                                           |
| Clackamas | 151                                           | 4,297                 | 3.5%                                           |
| Clatsop   | 16                                            | 226                   | 7.1%                                           |
| Columbia  | 34                                            | 789                   | 4.3%                                           |
| Coos      | 51                                            | 559                   | 9.1%                                           |

| County*   | Number of Farms with an Agroforestry Practice | Total Number of Farms | Percent of Farms with an Agroforestry Practice |
|-----------|-----------------------------------------------|-----------------------|------------------------------------------------|
| Crook     | 10                                            | 620                   | 1.6%                                           |
| Curry     | 19                                            | 200                   | 9.5%                                           |
| Deschutes | 6                                             | 1,484                 | 0.4%                                           |
| Douglas   | 135                                           | 2,009                 | 6.7%                                           |
| Gilliam   | 6                                             | 153                   | 3.9%                                           |
| Grant     | 7                                             | 383                   | 1.8%                                           |

## Agroforestry in Oregon based on the 2017 Census of Agriculture

| County*    | Number of Farms with an Agroforestry Practice | Total Number of Farms | Percent of Farms with an Agroforestry Practice |
|------------|-----------------------------------------------|-----------------------|------------------------------------------------|
| Harney     | 7                                             | 532                   | 1.3%                                           |
| Hood River | 27                                            | 578                   | 4.7%                                           |
| Jackson    | 95                                            | 2,136                 | 4.4%                                           |
| Jefferson  | 1                                             | 397                   | 0.3%                                           |
| Josephine  | 42                                            | 746                   | 5.6%                                           |
| Klamath    | 12                                            | 1,005                 | 1.2%                                           |
| Lake       | 6                                             | 381                   | 1.6%                                           |
| Lane       | 152                                           | 2,646                 | 5.7%                                           |
| Lincoln    | 34                                            | 384                   | 8.9%                                           |
| Linn       | 77                                            | 2,222                 | 3.5%                                           |
| Malheur    | 3                                             | 964                   | 0.3%                                           |
| Marion     | 71                                            | 2,761                 | 2.6%                                           |

| County*    | Number of Farms with an Agroforestry Practice | Total Number of Farms | Percent of Farms with an Agroforestry Practice |
|------------|-----------------------------------------------|-----------------------|------------------------------------------------|
| Morrow     | 6                                             | 375                   | 1.6%                                           |
| Multnomah  | 28                                            | 653                   | 4.3%                                           |
| Polk       | 76                                            | 1,243                 | 6.1%                                           |
| Tillamook  | 12                                            | 293                   | 4.1%                                           |
| Umatilla   | 12                                            | 1,724                 | 0.7%                                           |
| Union      | 22                                            | 820                   | 2.7%                                           |
| Wallowa    | 17                                            | 539                   | 3.2%                                           |
| Wasco      | 40                                            | 595                   | 6.7%                                           |
| Washington | 72                                            | 1,755                 | 4.1%                                           |
| Wheeler    | 6                                             | 150                   | 4.0%                                           |
| Yamhill    | 125                                           | 2,138                 | 5.8%                                           |

\*Counties not listed in the table have no farms reporting an agroforestry practice in 2017.

Total number of Oregon farms with an agroforestry practice: 1,467 Total number of Oregon farms: 37,616

Percentage of Oregon farms with an agroforestry practice: 3.9%

Data Source: USDA NASS Census of Agriculture 2017

Maps and table created by USDA National Agroforestry Center

# Agroforestry in Pennsylvania based on the 2017 Census of Agriculture

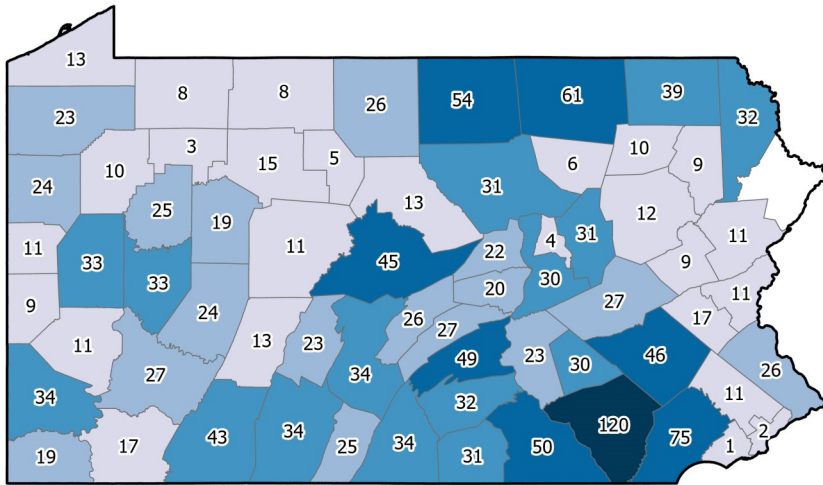

Number of Pennsylvania Farms Reporting an Agroforestry Practice in 2017

0 120 farms

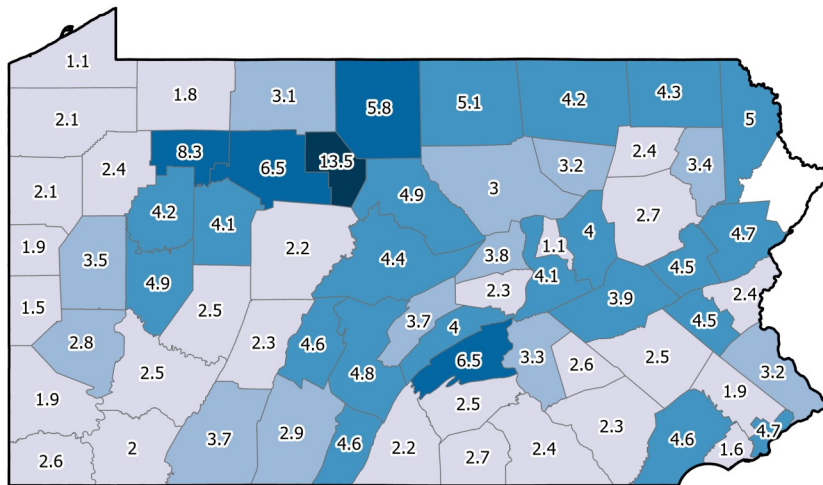

Percentage of Pennsylvania Farms Reporting an Agroforestry Practice in 2017

0% 13.5% of farms

| County*   | Number of Farms with an Agroforestry Practice | Total Number of Farms | Percent of Farms with an Agroforestry Practice |
|-----------|-----------------------------------------------|-----------------------|------------------------------------------------|
| Adams     | 31                                            | 1,146                 | 2.7%                                           |
| Allegheny | 11                                            | 389                   | 2.8%                                           |
| Armstrong | 33                                            | 668                   | 4.9%                                           |
| Beaver    | 9                                             | 613                   | 1.5%                                           |
| Bedford   | 34                                            | 1,159                 | 2.9%                                           |
| Berks     | 46                                            | 1,809                 | 2.5%                                           |
| Blair     | 23                                            | 496                   | 4.6%                                           |
| Bradford  | 61                                            | 1,449                 | 4.2%                                           |
| Bucks     | 26                                            | 824                   | 3.2%                                           |
| Butler    | 33                                            | 955                   | 3.5%                                           |

| County*    | Number of Farms with an Agroforestry Practice | Total Number of Farms | Percent of Farms with an Agroforestry Practice |
|------------|-----------------------------------------------|-----------------------|------------------------------------------------|
| Cambria    | 13                                            | 557                   | 2.3%                                           |
| Cameron    | 5                                             | 37                    | 13.5%                                          |
| Carbon     | 9                                             | 200                   | 4.5%                                           |
| Centre     | 45                                            | 1,023                 | 4.4%                                           |
| Chester    | 75                                            | 1,646                 | 4.6%                                           |
| Clarion    | 25                                            | 594                   | 4.2%                                           |
| Clearfield | 11                                            | 497                   | 2.2%                                           |
| Clinton    | 13                                            | 267                   | 4.9%                                           |
| Columbia   | 31                                            | 779                   | 4.0%                                           |
| Crawford   | 23                                            | 1,091                 | 2.1%                                           |

# Agroforestry in Pennsylvania based on the 2017 Census of Agriculture

| County*    | Number of Farms with an Agroforestry Practice | Total Number of Farms | Percent of Farms with an Agroforestry Practice |
|------------|-----------------------------------------------|-----------------------|------------------------------------------------|
| Cumberland | 32                                            | 1,260                 | 2.5%                                           |
| Dauphin    | 23                                            | 692                   | 3.3%                                           |
| Delaware   | 1                                             | 61                    | 1.6%                                           |
| Elk        | 15                                            | 232                   | 6.5%                                           |
| Erie       | 13                                            | 1,162                 | 1.1%                                           |
| Fayette    | 17                                            | 834                   | 2.0%                                           |
| Forest     | 3                                             | 36                    | 8.3%                                           |
| Franklin   | 34                                            | 1,581                 | 2.2%                                           |
| Fulton     | 25                                            | 545                   | 4.6%                                           |
| Greene     | 19                                            | 722                   | 2.6%                                           |
| Huntingdon | 34                                            | 714                   | 4.8%                                           |
| Indiana    | 24                                            | 951                   | 2.5%                                           |
| Jefferson  | 19                                            | 468                   | 4.1%                                           |
| Juniata    | 27                                            | 670                   | 4.0%                                           |
| Lackawanna | 9                                             | 263                   | 3.4%                                           |
| Lancaster  | 120                                           | 5,108                 | 2.3%                                           |
| Lawrence   | 11                                            | 587                   | 1.9%                                           |
| Lebanon    | 30                                            | 1,149                 | 2.6%                                           |
| Lehigh     | 17                                            | 381                   | 4.5%                                           |
| Luzerne    | 12                                            | 451                   | 2.7%                                           |
| Lycoming   | 31                                            | 1,043                 | 3.0%                                           |
| McKean     | 8                                             | 259                   | 3.1%                                           |
| Mercer     | 24                                            | 1,168                 | 2.1%                                           |

| County*        | Number of Farms with an Agroforestry Practice | Total Number of Farms | Percent of Farms with an Agroforestry Practice |
|----------------|-----------------------------------------------|-----------------------|------------------------------------------------|
| Mifflin        | 26                                            | 711                   | 3.7%                                           |
| Monroe         | 11                                            | 233                   | 4.7%                                           |
| Montgomery     | 11                                            | 565                   | 1.9%                                           |
| Montour        | 4                                             | 356                   | 1.1%                                           |
| Northampton    | 11                                            | 459                   | 2.4%                                           |
| Northumberland | 30                                            | 728                   | 4.1%                                           |
| Perry          | 49                                            | 759                   | 6.5%                                           |
| Philadelphia   | 2                                             | 43                    | 4.7%                                           |
| Potter         | 26                                            | 447                   | 5.8%                                           |
| Schuylkill     | 27                                            | 685                   | 3.9%                                           |
| Snyder         | 20                                            | 864                   | 2.3%                                           |
| Somerset       | 43                                            | 1,152                 | 3.7%                                           |
| Sullivan       | 6                                             | 190                   | 3.2%                                           |
| Susquehanna    | 39                                            | 909                   | 4.3%                                           |
| Tioga          | 54                                            | 1,056                 | 5.1%                                           |
| Union          | 22                                            | 574                   | 3.8%                                           |
| Venango        | 10                                            | 409                   | 2.4%                                           |
| Warren         | 8                                             | 452                   | 1.8%                                           |
| Washington     | 34                                            | 1,760                 | 1.9%                                           |
| Wayne          | 32                                            | 640                   | 5.0%                                           |
| Westmoreland   | 27                                            | 1,099                 | 2.5%                                           |
| Wyoming        | 10                                            | 410                   | 2.4%                                           |
| York           | 50                                            | 2,067                 | 2.4%                                           |

\*Counties not listed in the table have no farms reporting an agroforestry practice in 2017.

Total number of Pennsylvania farms with an agroforestry practice: 1,657 Total number of Pennsylvania farms: 53,157

Percentage of Pennsylvania farms with an agroforestry practice: 3.1%

Data Source: USDA NASS Census of Agriculture 2017

Maps and table created by USDA National Agroforestry Center

# Agroforestry in Rhode Island based on the 2017 Census of Agriculture

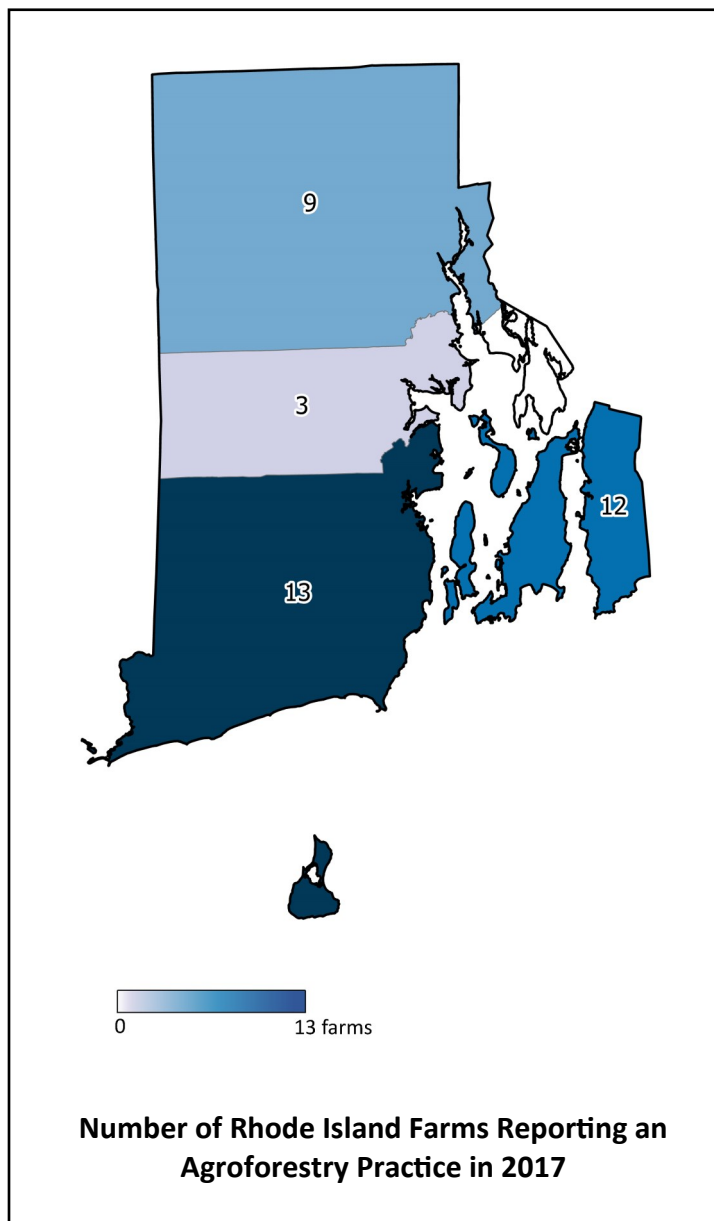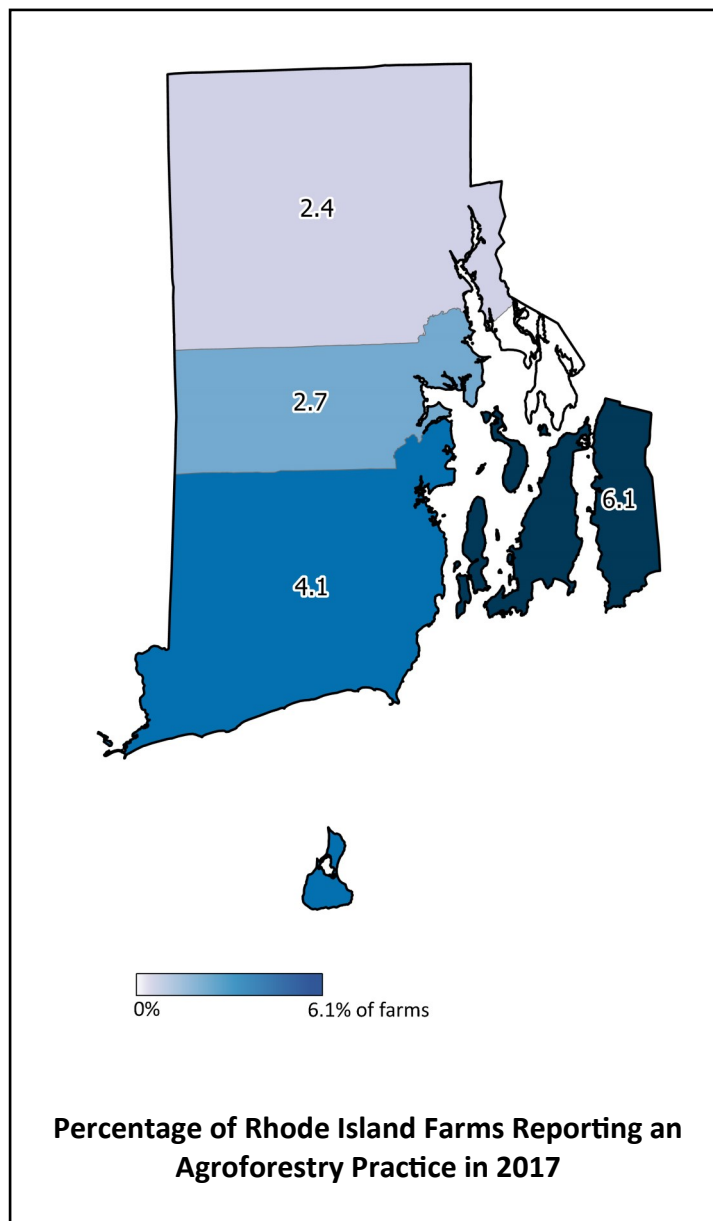

| County* | Number of Farms with an Agroforestry Practice | Total Number of Farms | Percent of Farms with an Agroforestry Practice |
|---------|-----------------------------------------------|-----------------------|------------------------------------------------|
| Kent    | 3                                             | 111                   | 2.7%                                           |
| Newport | 12                                            | 196                   | 6.1%                                           |

| County*    | Number of Farms with an Agroforestry Practice | Total Number of Farms | Percent of Farms with an Agroforestry Practice |
|------------|-----------------------------------------------|-----------------------|------------------------------------------------|
| Providence | 9                                             | 377                   | 2.4%                                           |
| Washington | 13                                            | 319                   | 4.1%                                           |

\*Counties not listed in the table have no farms reporting an agroforestry practice in 2017.

Total number of Rhode Island farms with an agroforestry practice: 37 Total number of Rhode Island farms: 1,043

Percentage of Rhode Island farms with an agroforestry practice: 3.5%

Data Source: USDA NASS Census of Agriculture 2017

Maps and table created by USDA National Agroforestry Center

# Agroforestry in South Carolina based on the 2017 Census of Agriculture

**Number of South Carolina Farms Reporting an Agroforestry Practice in 2017**

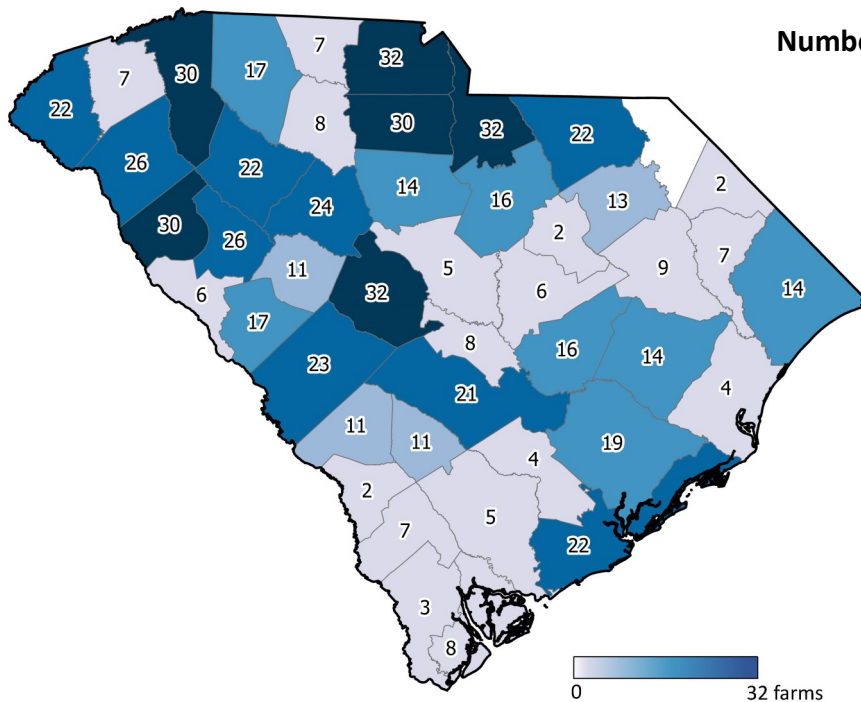

**Percentage of South Carolina Farms Reporting an Agroforestry Practice in 2017**

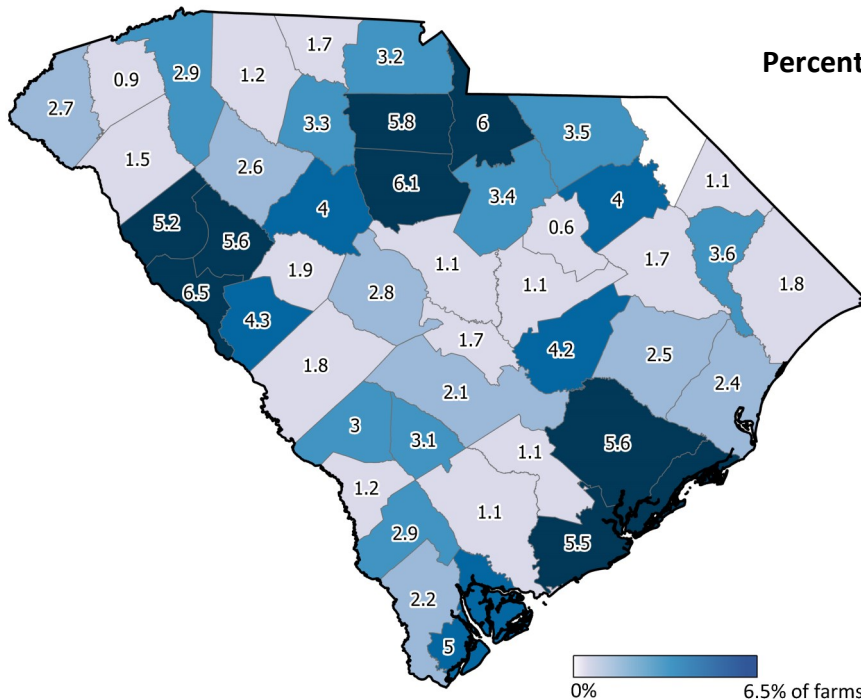

| County*   | Number of Farms with an Agroforestry Practice | Total Number of Farms | Percent of Farms with an Agroforestry Practice |
|-----------|-----------------------------------------------|-----------------------|------------------------------------------------|
| Abbeville | 30                                            | 576                   | 5.2%                                           |
| Aiken     | 23                                            | 1,249                 | 1.8%                                           |

| County*   | Number of Farms with an Agroforestry Practice | Total Number of Farms | Percent of Farms with an Agroforestry Practice |
|-----------|-----------------------------------------------|-----------------------|------------------------------------------------|
| Allendale | 2                                             | 165                   | 1.2%                                           |
| Anderson  | 26                                            | 1,742                 | 1.5%                                           |

## Agroforestry in South Carolina based on the 2017 Census of Agriculture

| County*      | Number of Farms with an Agroforestry Practice | Total Number of Farms | Percent of Farms with an Agroforestry Practice |
|--------------|-----------------------------------------------|-----------------------|------------------------------------------------|
| Bamberg      | 11                                            | 355                   | 3.1%                                           |
| Barnwell     | 11                                            | 369                   | 3.0%                                           |
| Beaufort     | 8                                             | 161                   | 5.0%                                           |
| Berkeley     | 19                                            | 339                   | 5.6%                                           |
| Calhoun      | 8                                             | 480                   | 1.7%                                           |
| Charleston   | 22                                            | 403                   | 5.5%                                           |
| Cherokee     | 7                                             | 415                   | 1.7%                                           |
| Chester      | 30                                            | 517                   | 5.8%                                           |
| Chesterfield | 22                                            | 636                   | 3.5%                                           |
| Clarendon    | 16                                            | 381                   | 4.2%                                           |
| Colleton     | 5                                             | 459                   | 1.1%                                           |
| Darlington   | 13                                            | 322                   | 4.0%                                           |
| Dillon       | 2                                             | 182                   | 1.1%                                           |
| Dorchester   | 4                                             | 358                   | 1.1%                                           |
| Edgefield    | 17                                            | 397                   | 4.3%                                           |
| Fairfield    | 14                                            | 228                   | 6.1%                                           |
| Florence     | 9                                             | 540                   | 1.7%                                           |
| Georgetown   | 4                                             | 166                   | 2.4%                                           |
| Greenville   | 30                                            | 1,036                 | 2.9%                                           |
| Greenwood    | 26                                            | 466                   | 5.6%                                           |
| Hampton      | 7                                             | 242                   | 2.9%                                           |

| County*      | Number of Farms with an Agroforestry Practice | Total Number of Farms | Percent of Farms with an Agroforestry Practice |
|--------------|-----------------------------------------------|-----------------------|------------------------------------------------|
| Horry        | 14                                            | 767                   | 1.8%                                           |
| Jasper       | 3                                             | 135                   | 2.2%                                           |
| Kershaw      | 16                                            | 466                   | 3.4%                                           |
| Lancaster    | 32                                            | 534                   | 6.0%                                           |
| Laurens      | 22                                            | 840                   | 2.6%                                           |
| Lee          | 2                                             | 334                   | 0.6%                                           |
| Lexington    | 32                                            | 1,137                 | 2.8%                                           |
| Marion       | 7                                             | 197                   | 3.6%                                           |
| McCormick    | 6                                             | 92                    | 6.5%                                           |
| Newberry     | 24                                            | 607                   | 4.0%                                           |
| Oconee       | 22                                            | 815                   | 2.7%                                           |
| Orangeburg   | 21                                            | 978                   | 2.1%                                           |
| Pickens      | 7                                             | 740                   | 0.9%                                           |
| Richland     | 5                                             | 440                   | 1.1%                                           |
| Saluda       | 11                                            | 574                   | 1.9%                                           |
| Spartanburg  | 17                                            | 1,433                 | 1.2%                                           |
| Sumter       | 6                                             | 524                   | 1.1%                                           |
| Union        | 8                                             | 241                   | 3.3%                                           |
| Williamsburg | 14                                            | 552                   | 2.5%                                           |
| York         | 32                                            | 1,000                 | 3.2%                                           |

\*Counties not listed in the table have no farms reporting an agroforestry practice in 2017.

**Total number of South Carolina farms with an agroforestry practice: 667    Total number of South Carolina farms: 24,791**

**Percentage of South Carolina farms with an agroforestry practice: 2.7%**

**Data Source: USDA NASS Census of Agriculture 2017**

**Maps and table created by USDA National Agroforestry Center**

# Agroforestry in South Dakota based on the 2017 Census of Agriculture

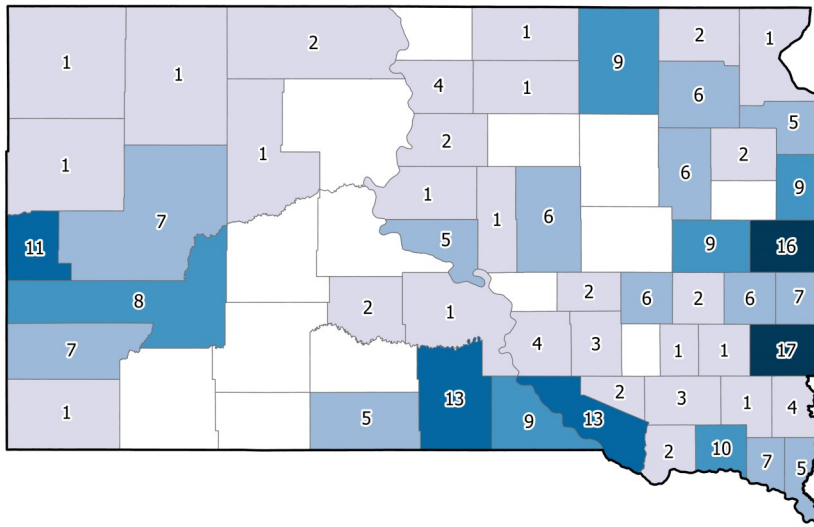

Number of South Dakota Farms Reporting an Agroforestry Practice in 2017

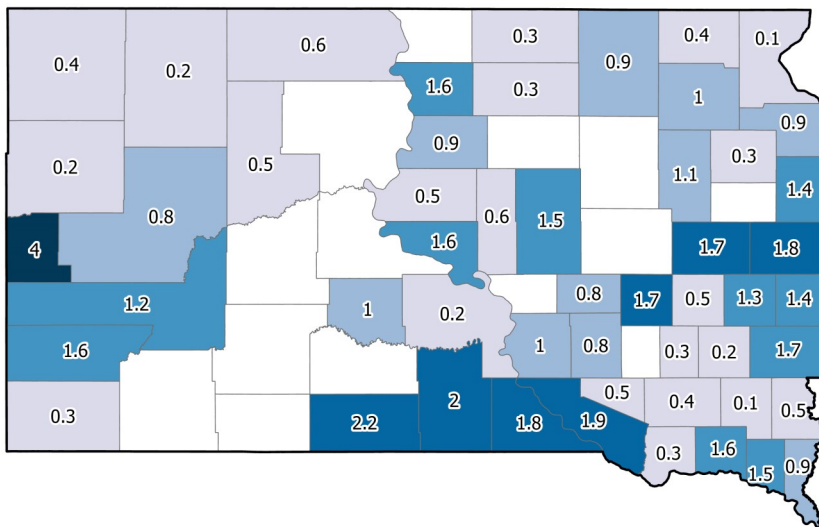

Percentage of South Dakota Farms Reporting an Agroforestry Practice in 2017

| County*     | Number of Farms with an Agroforestry Practice | Total Number of Farms | Percent of Farms with an Agroforestry Practice |
|-------------|-----------------------------------------------|-----------------------|------------------------------------------------|
| Aurora      | 3                                             | 392                   | 0.8%                                           |
| Bon Homme   | 2                                             | 583                   | 0.3%                                           |
| Brookings   | 16                                            | 886                   | 1.8%                                           |
| Brown       | 9                                             | 1,034                 | 0.9%                                           |
| Brule       | 4                                             | 394                   | 1.0%                                           |
| Butte       | 1                                             | 565                   | 0.2%                                           |
| Charles Mix | 13                                            | 671                   | 1.9%                                           |
| Clark       | 6                                             | 553                   | 1.1%                                           |
| Clay        | 7                                             | 472                   | 1.5%                                           |
| Codington   | 2                                             | 601                   | 0.3%                                           |

| County*    | Number of Farms with an Agroforestry Practice | Total Number of Farms | Percent of Farms with an Agroforestry Practice |
|------------|-----------------------------------------------|-----------------------|------------------------------------------------|
| Corson     | 2                                             | 322                   | 0.6%                                           |
| Custer     | 7                                             | 441                   | 1.6%                                           |
| Day        | 6                                             | 581                   | 1.0%                                           |
| Deuel      | 9                                             | 634                   | 1.4%                                           |
| Douglas    | 2                                             | 392                   | 0.5%                                           |
| Edmunds    | 1                                             | 348                   | 0.3%                                           |
| Fall River | 1                                             | 314                   | 0.3%                                           |
| Grant      | 5                                             | 554                   | 0.9%                                           |
| Gregory    | 9                                             | 495                   | 1.8%                                           |
| Hand       | 6                                             | 405                   | 1.5%                                           |

## Agroforestry in South Dakota based on the 2017 Census of Agriculture

| County*    | Number of Farms with an Agroforestry Practice | Total Number of Farms | Percent of Farms with an Agroforestry Practice |
|------------|-----------------------------------------------|-----------------------|------------------------------------------------|
| Hanson     | 1                                             | 333                   | 0.3%                                           |
| Harding    | 1                                             | 265                   | 0.4%                                           |
| Hughes     | 5                                             | 315                   | 1.6%                                           |
| Hutchinson | 3                                             | 775                   | 0.4%                                           |
| Hyde       | 1                                             | 174                   | 0.6%                                           |
| Jerauld    | 2                                             | 244                   | 0.8%                                           |
| Jones      | 2                                             | 192                   | 1.0%                                           |
| Kingsbury  | 9                                             | 518                   | 1.7%                                           |
| Lake       | 6                                             | 463                   | 1.3%                                           |
| Lawrence   | 11                                            | 275                   | 4.0%                                           |
| Lincoln    | 4                                             | 756                   | 0.5%                                           |
| Lyman      | 1                                             | 414                   | 0.2%                                           |
| Marshall   | 2                                             | 503                   | 0.4%                                           |
| McCook     | 1                                             | 512                   | 0.2%                                           |
| McPherson  | 1                                             | 382                   | 0.3%                                           |
| Meade      | 7                                             | 835                   | 0.8%                                           |

| County*    | Number of Farms with an Agroforestry Practice | Total Number of Farms | Percent of Farms with an Agroforestry Practice |
|------------|-----------------------------------------------|-----------------------|------------------------------------------------|
| Miner      | 2                                             | 408                   | 0.5%                                           |
| Minnehaha  | 17                                            | 1,023                 | 1.7%                                           |
| Moody      | 7                                             | 490                   | 1.4%                                           |
| Pennington | 8                                             | 656                   | 1.2%                                           |
| Perkins    | 1                                             | 421                   | 0.2%                                           |
| Potter     | 2                                             | 221                   | 0.9%                                           |
| Roberts    | 1                                             | 782                   | 0.1%                                           |
| Sanborn    | 6                                             | 351                   | 1.7%                                           |
| Sully      | 1                                             | 201                   | 0.5%                                           |
| Todd       | 5                                             | 223                   | 2.2%                                           |
| Tripp      | 13                                            | 648                   | 2.0%                                           |
| Turner     | 1                                             | 757                   | 0.1%                                           |
| Union      | 5                                             | 557                   | 0.9%                                           |
| Walworth   | 4                                             | 256                   | 1.6%                                           |
| Yankton    | 10                                            | 610                   | 1.6%                                           |
| Ziebach    | 1                                             | 213                   | 0.5%                                           |

\*Counties not listed in the table have no farms reporting an agroforestry practice in 2017.

**Total number of South Dakota farms with an agroforestry practice: 252    Total number of South Dakota farms: 29,968**

**Percentage of South Dakota farms with an agroforestry practice: 0.8%**

**Data Source: USDA NASS Census of Agriculture 2017**

**Maps and table created by USDA National Agroforestry Center**

# Agroforestry in Tennessee based on the 2017 Census of Agriculture

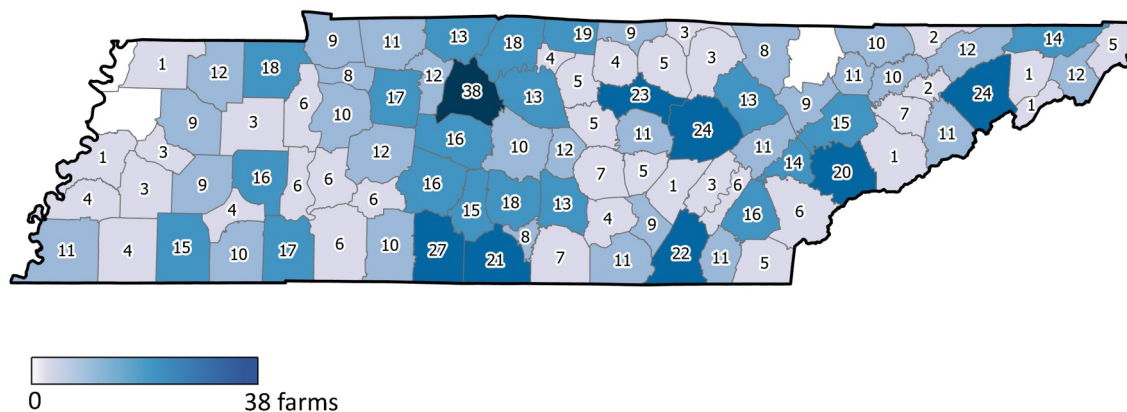

**Number of Tennessee Farms Reporting an Agroforestry Practice in 2017**

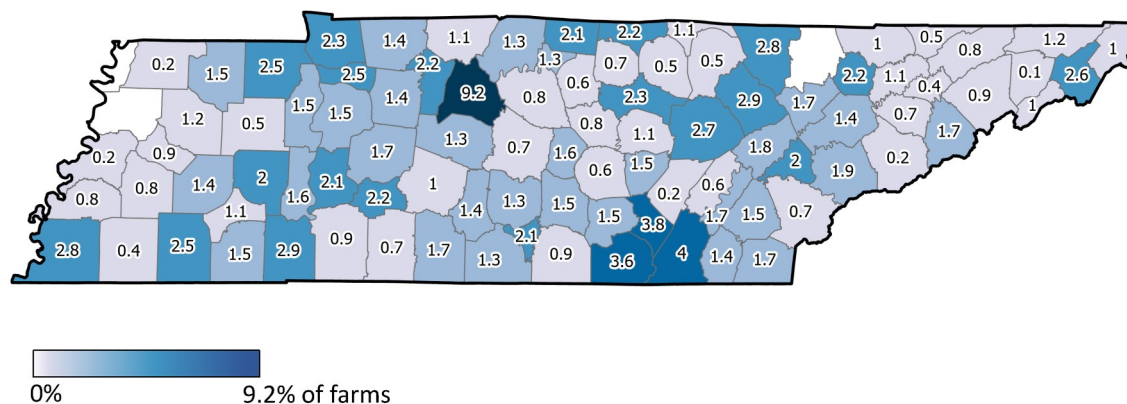

**Percentage of Tennessee Farms Reporting an Agroforestry Practice in 2017**

| County*   | Number of Farms with an Agroforestry Practice | Total Number of Farms | Percent of Farms with an Agroforestry Practice |
|-----------|-----------------------------------------------|-----------------------|------------------------------------------------|
| Anderson  | 9                                             | 538                   | 1.7%                                           |
| Bedford   | 18                                            | 1,430                 | 1.3%                                           |
| Benton    | 6                                             | 399                   | 1.5%                                           |
| Bledsoe   | 1                                             | 614                   | 0.2%                                           |
| Blount    | 20                                            | 1,073                 | 1.9%                                           |
| Bradley   | 11                                            | 778                   | 1.4%                                           |
| Cannon    | 12                                            | 728                   | 1.6%                                           |
| Carroll   | 3                                             | 662                   | 0.5%                                           |
| Carter    | 12                                            | 469                   | 2.6%                                           |
| Cheatham  | 12                                            | 543                   | 2.2%                                           |
| Chester   | 4                                             | 380                   | 1.1%                                           |
| Claiborne | 10                                            | 966                   | 1.0%                                           |
| Clay      | 9                                             | 404                   | 2.2%                                           |
| Cocke     | 11                                            | 645                   | 1.7%                                           |

| County*    | Number of Farms with an Agroforestry Practice | Total Number of Farms | Percent of Farms with an Agroforestry Practice |
|------------|-----------------------------------------------|-----------------------|------------------------------------------------|
| Coffee     | 13                                            | 872                   | 1.5%                                           |
| Crockett   | 3                                             | 322                   | 0.9%                                           |
| Cumberland | 24                                            | 886                   | 2.7%                                           |
| Davidson   | 38                                            | 414                   | 9.2%                                           |
| Decatur    | 6                                             | 374                   | 1.6%                                           |
| DeKalb     | 5                                             | 654                   | 0.8%                                           |
| Dickson    | 17                                            | 1,225                 | 1.4%                                           |
| Fayette    | 4                                             | 892                   | 0.4%                                           |
| Fentress   | 3                                             | 620                   | 0.5%                                           |
| Franklin   | 7                                             | 818                   | 0.9%                                           |
| Gibson     | 9                                             | 777                   | 1.2%                                           |
| Giles      | 27                                            | 1,599                 | 1.7%                                           |
| Grainger   | 10                                            | 923                   | 1.1%                                           |
| Greene     | 24                                            | 2,562                 | 0.9%                                           |

# Agroforestry in Tennessee based on the 2017 Census of Agriculture

| County*    | Number of Farms with an Agroforestry Practice | Total Number of Farms | Percent of Farms with an Agroforestry Practice |
|------------|-----------------------------------------------|-----------------------|------------------------------------------------|
| Grundy     | 4                                             | 261                   | 1.5%                                           |
| Hamblen    | 2                                             | 559                   | 0.4%                                           |
| Hamilton   | 22                                            | 547                   | 4.0%                                           |
| Hancock    | 2                                             | 408                   | 0.5%                                           |
| Hardeman   | 15                                            | 613                   | 2.4%                                           |
| Hardin     | 17                                            | 583                   | 2.9%                                           |
| Hawkins    | 12                                            | 1,484                 | 0.8%                                           |
| Haywood    | 3                                             | 361                   | 0.8%                                           |
| Henderson  | 16                                            | 786                   | 2.0%                                           |
| Henry      | 18                                            | 710                   | 2.5%                                           |
| Hickman    | 12                                            | 706                   | 1.7%                                           |
| Houston    | 8                                             | 326                   | 2.5%                                           |
| Humphreys  | 10                                            | 657                   | 1.5%                                           |
| Jackson    | 4                                             | 538                   | 0.7%                                           |
| Jefferson  | 7                                             | 973                   | 0.7%                                           |
| Johnson    | 5                                             | 517                   | 1.0%                                           |
| Knox       | 15                                            | 1,037                 | 1.4%                                           |
| Lauderdale | 1                                             | 404                   | 0.2%                                           |
| Lawrence   | 10                                            | 1,394                 | 0.7%                                           |
| Lewis      | 6                                             | 272                   | 2.2%                                           |
| Lincoln    | 21                                            | 1,654                 | 1.3%                                           |
| Loudon     | 14                                            | 691                   | 2.0%                                           |
| Macon      | 19                                            | 912                   | 2.1%                                           |
| Madison    | 9                                             | 549                   | 1.6%                                           |
| Marion     | 11                                            | 308                   | 3.6%                                           |
| Marshall   | 15                                            | 1,096                 | 1.4%                                           |
| Maury      | 16                                            | 1,583                 | 1.0%                                           |
| McMinn     | 16                                            | 1,054                 | 1.5%                                           |
| McNairy    | 10                                            | 654                   | 1.5%                                           |
| Meigs      | 6                                             | 351                   | 1.7%                                           |
| Monroe     | 6                                             | 838                   | 0.7%                                           |
| Montgomery | 11                                            | 787                   | 1.4%                                           |

| County*    | Number of Farms with an Agroforestry Practice | Total Number of Farms | Percent of Farms with an Agroforestry Practice |
|------------|-----------------------------------------------|-----------------------|------------------------------------------------|
| Moore      | 8                                             | 375                   | 2.1%                                           |
| Morgan     | 13                                            | 443                   | 2.9%                                           |
| Obion      | 1                                             | 553                   | 0.2%                                           |
| Overton    | 5                                             | 1,004                 | 0.5%                                           |
| Perry      | 6                                             | 287                   | 2.1%                                           |
| Pickett    | 3                                             | 287                   | 1.0%                                           |
| Polk       | 5                                             | 287                   | 1.7%                                           |
| Putnam     | 23                                            | 1,003                 | 2.3%                                           |
| Rhea       | 3                                             | 498                   | 0.6%                                           |
| Roane      | 11                                            | 617                   | 1.8%                                           |
| Robertson  | 13                                            | 1,202                 | 1.1%                                           |
| Rutherford | 10                                            | 1,414                 | 0.7%                                           |
| Scott      | 8                                             | 288                   | 2.8%                                           |
| Sequatchie | 9                                             | 235                   | 3.8%                                           |
| Sevier     | 1                                             | 547                   | 0.2%                                           |
| Shelby     | 11                                            | 399                   | 2.8%                                           |
| Smith      | 5                                             | 885                   | 0.6%                                           |
| Stewart    | 9                                             | 389                   | 2.3%                                           |
| Sullivan   | 14                                            | 1,183                 | 1.2%                                           |
| Sumner     | 18                                            | 1,428                 | 1.3%                                           |
| Tipton     | 4                                             | 527                   | 0.8%                                           |
| Trousdale  | 4                                             | 317                   | 1.3%                                           |
| Unicoi     | 1                                             | 100                   | 1.0%                                           |
| Union      | 11                                            | 505                   | 2.2%                                           |
| Van Buren  | 5                                             | 329                   | 1.5%                                           |
| Warren     | 7                                             | 1,133                 | 0.6%                                           |
| Washington | 1                                             | 1,428                 | 0.1%                                           |
| Wayne      | 6                                             | 685                   | 0.9%                                           |
| Weakley    | 12                                            | 788                   | 1.5%                                           |
| White      | 11                                            | 971                   | 1.1%                                           |
| Williamson | 16                                            | 1,224                 | 1.3%                                           |
| Wilson     | 13                                            | 1,626                 | 0.8%                                           |

\*Counties not listed in the table have no farms reporting an agroforestry practice in 2017.

Total number of Tennessee farms with an agroforestry practice: 938 Total number of Tennessee farms: 69,983

Percentage of Tennessee farms with an agroforestry practice: 1.3%

Data Source: USDA NASS Census of Agriculture 2017

Maps and table created by USDA National Agroforestry Center

# Agroforestry in Texas based on the 2017 Census of Agriculture

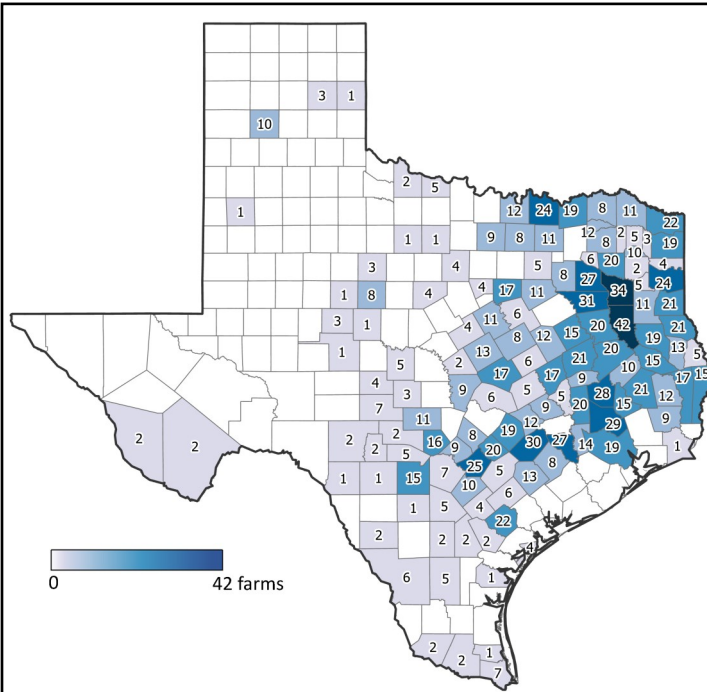

**Number of Texas Farms Reporting an Agroforestry Practice in 2017**

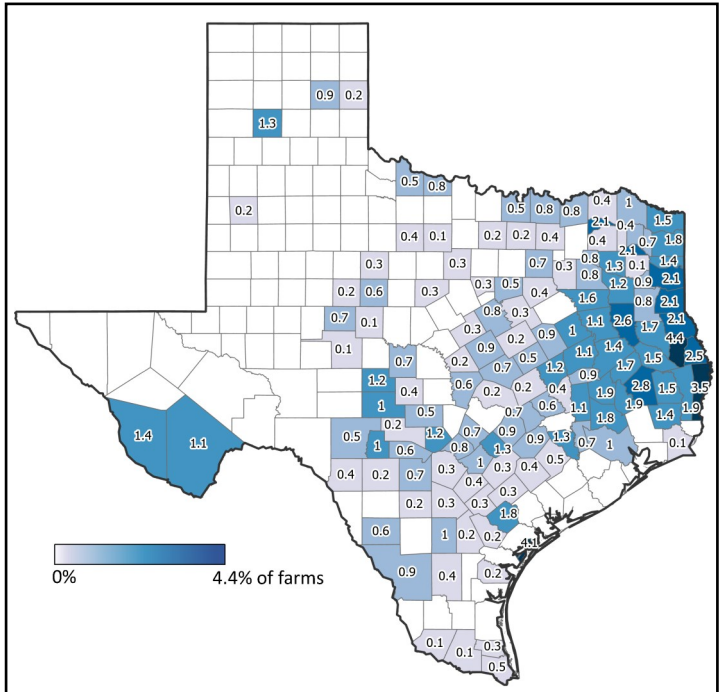

**Percentage of Texas Farms Reporting an Agroforestry Practice in 2017**

| County*  | Number of Farms with an Agroforestry Practice | Total Number of Farms | Percent of Farms with an Agroforestry Practice |
|----------|-----------------------------------------------|-----------------------|------------------------------------------------|
| Anderson | 20                                            | 1,754                 | 1.1%                                           |
| Angelina | 15                                            | 1,028                 | 1.5%                                           |
| Aransas  | 4                                             | 97                    | 4.1%                                           |
| Atascosa | 5                                             | 1,681                 | 0.3%                                           |
| Austin   | 27                                            | 2,113                 | 1.3%                                           |
| Bandera  | 5                                             | 897                   | 0.6%                                           |
| Bastrop  | 19                                            | 2,120                 | 0.9%                                           |
| Bee      | 2                                             | 943                   | 0.2%                                           |
| Bell     | 17                                            | 2,436                 | 0.7%                                           |
| Bexar    | 7                                             | 2,520                 | 0.3%                                           |
| Bosque   | 11                                            | 1,305                 | 0.8%                                           |
| Bowie    | 22                                            | 1,506                 | 1.5%                                           |
| Brazos   | 5                                             | 1,363                 | 0.4%                                           |
| Brewster | 2                                             | 174                   | 1.1%                                           |
| Burleson | 9                                             | 1,648                 | 0.5%                                           |
| Burnet   | 9                                             | 1,623                 | 0.6%                                           |
| Caldwell | 20                                            | 1,517                 | 1.3%                                           |
| Cameron  | 7                                             | 1,418                 | 0.5%                                           |
| Camp     | 10                                            | 484                   | 2.1%                                           |
| Cass     | 19                                            | 1,081                 | 1.8%                                           |

| County*  | Number of Farms with an Agroforestry Practice | Total Number of Farms | Percent of Farms with an Agroforestry Practice |
|----------|-----------------------------------------------|-----------------------|------------------------------------------------|
| Cherokee | 42                                            | 1,587                 | 2.6%                                           |
| Coke     | 3                                             | 449                   | 0.7%                                           |
| Collin   | 11                                            | 2,706                 | 0.4%                                           |
| Colorado | 8                                             | 1,773                 | 0.5%                                           |
| Comal    | 9                                             | 1,068                 | 0.8%                                           |
| Cooke    | 12                                            | 2,284                 | 0.5%                                           |
| Coryell  | 13                                            | 1,479                 | 0.9%                                           |
| Dallas   | 5                                             | 775                   | 0.6%                                           |
| Delta    | 12                                            | 571                   | 2.1%                                           |
| Denton   | 8                                             | 3,295                 | 0.2%                                           |
| DeWitt   | 6                                             | 1,768                 | 0.3%                                           |
| Dimmit   | 2                                             | 328                   | 0.6%                                           |
| Duval    | 5                                             | 1,367                 | 0.4%                                           |
| Eastland | 4                                             | 1,198                 | 0.3%                                           |
| Edwards  | 2                                             | 380                   | 0.5%                                           |
| Ellis    | 11                                            | 2,551                 | 0.4%                                           |
| Falls    | 6                                             | 1,103                 | 0.5%                                           |
| Fannin   | 19                                            | 2,255                 | 0.8%                                           |
| Fayette  | 30                                            | 3,166                 | 0.9%                                           |
| Franklin | 2                                             | 493                   | 0.4%                                           |

# Agroforestry in Texas based on the 2017 Census of Agriculture

| County*   | Number of Farms with an Agroforestry Practice | Total Number of Farms | Percent of Farms with an Agroforestry Practice |
|-----------|-----------------------------------------------|-----------------------|------------------------------------------------|
| Freestone | 15                                            | 1,459                 | 1.0%                                           |
| Frio      | 1                                             | 663                   | 0.2%                                           |
| Gillespie | 11                                            | 2,079                 | 0.5%                                           |
| Goliad    | 22                                            | 1,255                 | 1.8%                                           |
| Gonzales  | 5                                             | 1,612                 | 0.3%                                           |
| Gray      | 3                                             | 348                   | 0.9%                                           |
| Grayson   | 24                                            | 2,845                 | 0.8%                                           |
| Gregg     | 5                                             | 541                   | 0.9%                                           |
| Grimes    | 20                                            | 1,771                 | 1.1%                                           |
| Guadalupe | 25                                            | 2,543                 | 1.0%                                           |
| Hamilton  | 4                                             | 1,163                 | 0.3%                                           |
| Hardin    | 9                                             | 661                   | 1.4%                                           |
| Harris    | 19                                            | 1,891                 | 1.0%                                           |
| Harrison  | 24                                            | 1,134                 | 2.1%                                           |
| Hays      | 8                                             | 1,128                 | 0.7%                                           |
| Henderson | 31                                            | 1,988                 | 1.6%                                           |
| Hidalgo   | 2                                             | 2,436                 | 0.1%                                           |
| Hill      | 6                                             | 2,003                 | 0.3%                                           |
| Hockley   | 1                                             | 661                   | 0.2%                                           |
| Hood      | 4                                             | 1,176                 | 0.3%                                           |
| Hopkins   | 8                                             | 2,200                 | 0.4%                                           |
| Houston   | 20                                            | 1,422                 | 1.4%                                           |
| Jasper    | 17                                            | 896                   | 1.9%                                           |
| Jefferson | 1                                             | 729                   | 0.1%                                           |
| Johnson   | 17                                            | 3,140                 | 0.5%                                           |
| Jones     | 3                                             | 915                   | 0.3%                                           |
| Karnes    | 4                                             | 1,213                 | 0.3%                                           |
| Kaufman   | 8                                             | 2,778                 | 0.3%                                           |
| Kendall   | 16                                            | 1,349                 | 1.2%                                           |
| Kerr      | 2                                             | 1,128                 | 0.2%                                           |
| Kimble    | 7                                             | 670                   | 1.0%                                           |
| Kinney    | 1                                             | 236                   | 0.4%                                           |
| Lamar     | 8                                             | 1,946                 | 0.4%                                           |
| Lampasas  | 2                                             | 1,151                 | 0.2%                                           |
| Lavaca    | 13                                            | 2,900                 | 0.4%                                           |
| Lee       | 12                                            | 1,809                 | 0.7%                                           |
| Leon      | 21                                            | 1,951                 | 1.1%                                           |
| Limestone | 12                                            | 1,284                 | 0.9%                                           |
| Live Oak  | 2                                             | 856                   | 0.2%                                           |
| Madison   | 9                                             | 977                   | 0.9%                                           |
| Marion    | 4                                             | 280                   | 1.4%                                           |
| Mason     | 3                                             | 680                   | 0.4%                                           |
| McCulloch | 5                                             | 682                   | 0.7%                                           |

| County*       | Number of Farms with an Agroforestry Practice | Total Number of Farms | Percent of Farms with an Agroforestry Practice |
|---------------|-----------------------------------------------|-----------------------|------------------------------------------------|
| McLennan      | 8                                             | 3,366                 | 0.2%                                           |
| McMullen      | 2                                             | 191                   | 1.0%                                           |
| Medina        | 15                                            | 2,281                 | 0.7%                                           |
| Menard        | 4                                             | 346                   | 1.2%                                           |
| Milam         | 5                                             | 2,053                 | 0.2%                                           |
| Montgomery    | 29                                            | 1,614                 | 1.8%                                           |
| Morris        | 3                                             | 449                   | 0.7%                                           |
| Nacogdoches   | 19                                            | 1,123                 | 1.7%                                           |
| Newton        | 15                                            | 430                   | 3.5%                                           |
| Nolan         | 1                                             | 410                   | 0.2%                                           |
| Nueces        | 1                                             | 646                   | 0.2%                                           |
| Palo Pinto    | 4                                             | 1,265                 | 0.3%                                           |
| Panola        | 21                                            | 978                   | 2.1%                                           |
| Polk          | 21                                            | 742                   | 2.8%                                           |
| Presidio      | 2                                             | 142                   | 1.4%                                           |
| Rains         | 6                                             | 787                   | 0.8%                                           |
| Randall       | 10                                            | 781                   | 1.3%                                           |
| Real          | 2                                             | 198                   | 1.0%                                           |
| Red River     | 11                                            | 1,126                 | 1.0%                                           |
| Robertson     | 17                                            | 1,471                 | 1.2%                                           |
| Runnels       | 1                                             | 833                   | 0.1%                                           |
| Rusk          | 11                                            | 1,441                 | 0.8%                                           |
| Sabine        | 5                                             | 200                   | 2.5%                                           |
| San Augustine | 13                                            | 293                   | 4.4%                                           |
| San Jacinto   | 15                                            | 786                   | 1.9%                                           |
| Shelby        | 21                                            | 995                   | 2.1%                                           |
| Smith         | 34                                            | 2,928                 | 1.2%                                           |
| Starr         | 2                                             | 1,345                 | 0.1%                                           |
| Taylor        | 8                                             | 1,394                 | 0.6%                                           |
| Throckmorton  | 1                                             | 274                   | 0.4%                                           |
| Titus         | 5                                             | 812                   | 0.6%                                           |
| Tom Green     | 1                                             | 1,303                 | 0.1%                                           |
| Trinity       | 10                                            | 601                   | 1.7%                                           |
| Tyler         | 12                                            | 778                   | 1.5%                                           |
| Upshur        | 2                                             | 1,652                 | 0.1%                                           |
| Uvalde        | 1                                             | 592                   | 0.2%                                           |
| Van Zandt     | 27                                            | 3,405                 | 0.8%                                           |
| Walker        | 28                                            | 1,441                 | 1.9%                                           |
| Waller        | 14                                            | 1,881                 | 0.7%                                           |
| Webb          | 6                                             | 656                   | 0.9%                                           |
| Wheeler       | 1                                             | 510                   | 0.2%                                           |
| Wichita       | 5                                             | 614                   | 0.8%                                           |
| Wilbarger     | 2                                             | 395                   | 0.5%                                           |

## Agroforestry in Texas based on the 2017 Census of Agriculture

| County*    | Number of<br>Farms with an<br>Agroforestry<br>Practice | Total<br>Number<br>of Farms | Percent of<br>Farms with an<br>Agroforestry<br>Practice |
|------------|--------------------------------------------------------|-----------------------------|---------------------------------------------------------|
| Willacy    | 1                                                      | 351                         | 0.3%                                                    |
| Williamson | 6                                                      | 2,634                       | 0.2%                                                    |
| Wilson     | 10                                                     | 2,621                       | 0.4%                                                    |

| County* | Number of<br>Farms with an<br>Agroforestry<br>Practice | Total<br>Number<br>of Farms | Percent of<br>Farms with an<br>Agroforestry<br>Practice |
|---------|--------------------------------------------------------|-----------------------------|---------------------------------------------------------|
| Wise    | 1                                                      | 3,697                       | 0.2%                                                    |
| Wood    | 6                                                      | 1,587                       | 1.3%                                                    |
| Young   | 10                                                     | 853                         | 0.1%                                                    |

\*Counties not listed in the table have no farms reporting an agroforestry practice in 2017.

Total number of Texas farms with an agroforestry practice: 1,347 Total number of Texas farms: 248,416

Percentage of Texas farms with an agroforestry practice: 0.5%

Data Source: USDA NASS Census of Agriculture 2017

Maps and table created by USDA National Agroforestry Center

# Agroforestry in Utah based on the 2017 Census of Agriculture

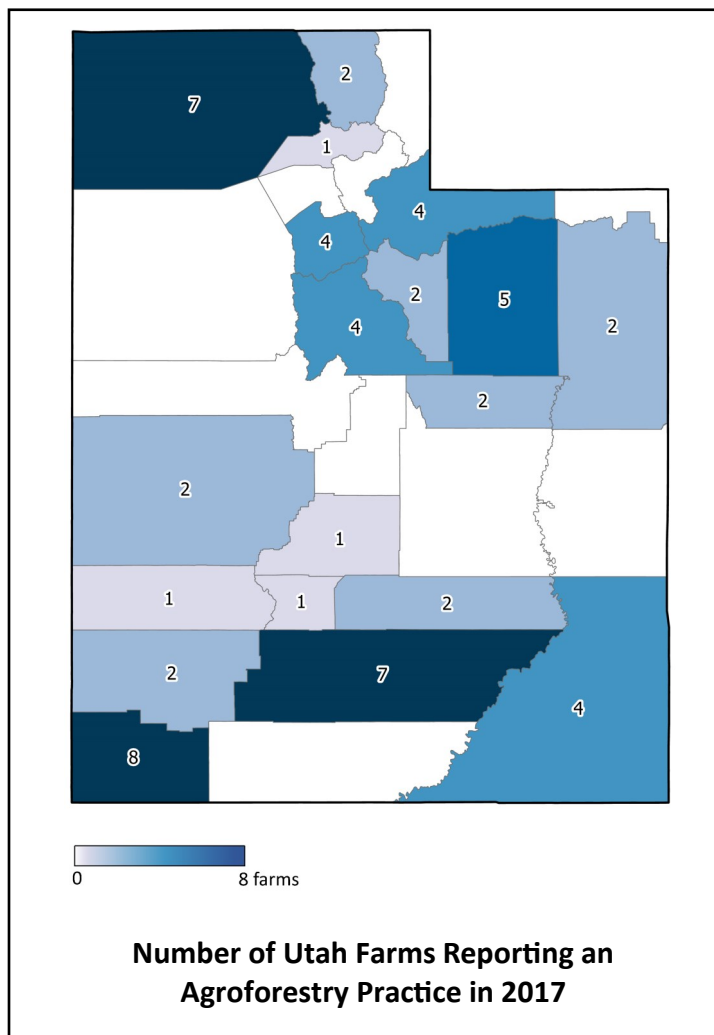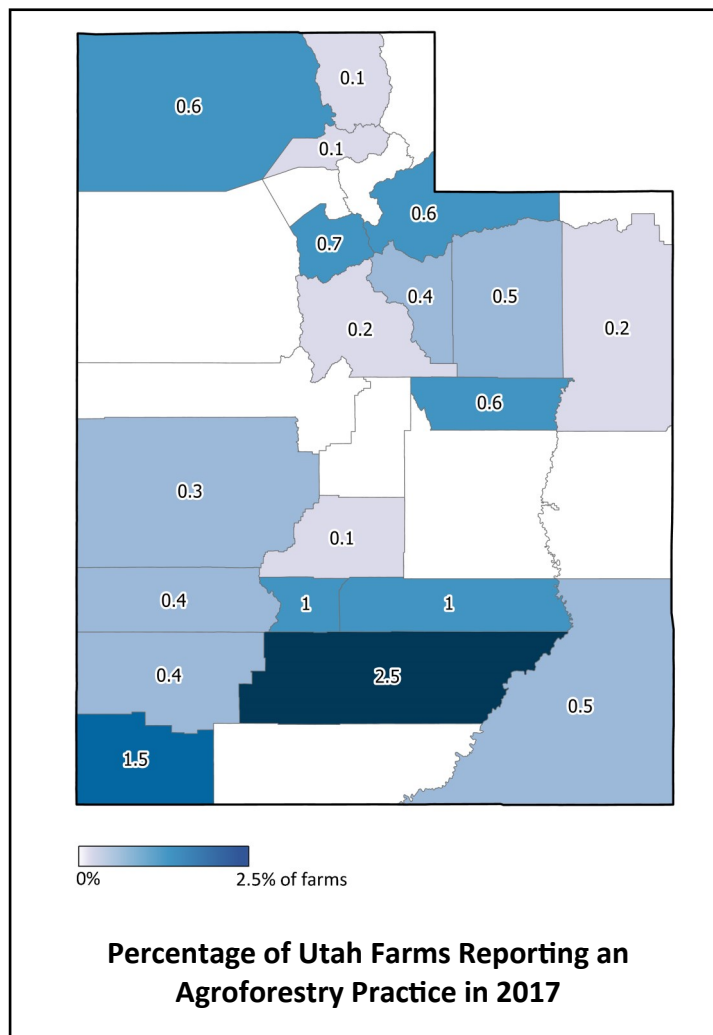

| County*   | Number of Farms with an Agroforestry Practice | Total Number of Farms | Percent of Farms with an Agroforestry Practice |
|-----------|-----------------------------------------------|-----------------------|------------------------------------------------|
| Beaver    | 1                                             | 272                   | 0.4%                                           |
| Box Elder | 7                                             | 1,187                 | 0.6%                                           |
| Cache     | 2                                             | 1,397                 | 0.1%                                           |
| Carbon    | 2                                             | 309                   | 0.6%                                           |
| Duchesne  | 5                                             | 1,063                 | 0.5%                                           |
| Garfield  | 7                                             | 286                   | 2.4%                                           |
| Iron      | 2                                             | 486                   | 0.4%                                           |
| Millard   | 2                                             | 654                   | 0.3%                                           |
| Piute     | 1                                             | 104                   | 1.0%                                           |
| Salt Lake | 4                                             | 592                   | 0.7%                                           |

| County*    | Number of Farms with an Agroforestry Practice | Total Number of Farms | Percent of Farms with an Agroforestry Practice |
|------------|-----------------------------------------------|-----------------------|------------------------------------------------|
| San Juan   | 4                                             | 823                   | 0.5%                                           |
| Sevier     | 1                                             | 691                   | 0.1%                                           |
| Summit     | 4                                             | 626                   | 0.6%                                           |
| Uintah     | 2                                             | 1,114                 | 0.2%                                           |
| Utah       | 4                                             | 2,589                 | 0.2%                                           |
| Wasatch    | 2                                             | 475                   | 0.4%                                           |
| Washington | 8                                             | 537                   | 1.5%                                           |
| Wayne      | 2                                             | 209                   | 1.0%                                           |
| Weber      | 1                                             | 1,260                 | 0.1%                                           |

\*Counties not listed in the table have no farms reporting an agroforestry practice in 2017.

Total number of Utah farms with an agroforestry practice: 61 Total number of Utah farms: 18,409

Percentage of Utah farms with an agroforestry practice: 0.3%

Data Source: USDA NASS Census of Agriculture 2017

Maps and table created by USDA National Agroforestry Center

# Agroforestry in Vermont based on the 2017 Census of Agriculture

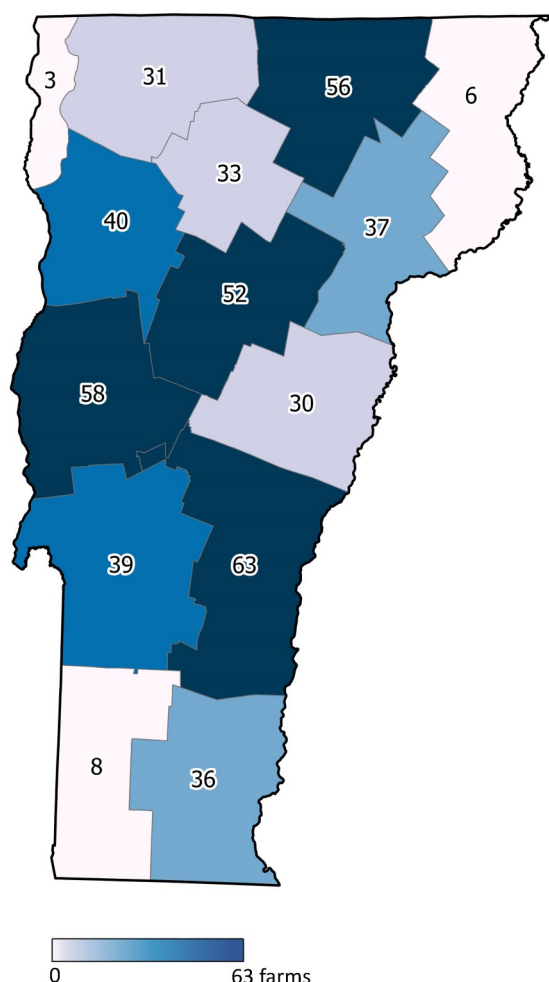

**Number of Vermont Farms Reporting an Agroforestry Practice in 2017**

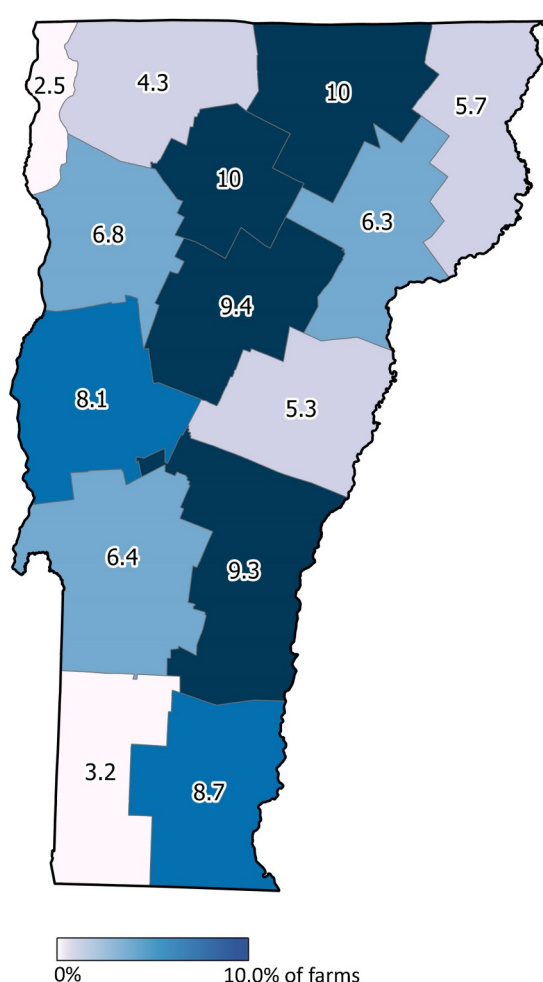

**Percentage of Vermont Farms Reporting an Agroforestry Practice in 2017**

| County     | Number of Farms with an Agroforestry Practice | Total Number of Farms | Percent of Farms with an Agroforestry Practice |
|------------|-----------------------------------------------|-----------------------|------------------------------------------------|
| Addison    | 58                                            | 720                   | 8.1%                                           |
| Bennington | 8                                             | 250                   | 3.2%                                           |
| Caledonia  | 37                                            | 585                   | 6.3%                                           |
| Chittenden | 40                                            | 585                   | 6.8%                                           |
| Essex      | 6                                             | 106                   | 5.7%                                           |
| Franklin   | 31                                            | 729                   | 4.3%                                           |
| Grand Isle | 3                                             | 119                   | 2.5%                                           |

| County     | Number of Farms with an Agroforestry Practice | Total Number of Farms | Percent of Farms with an Agroforestry Practice |
|------------|-----------------------------------------------|-----------------------|------------------------------------------------|
| Lamoille   | 33                                            | 329                   | 10.0%                                          |
| Orange     | 30                                            | 569                   | 5.3%                                           |
| Orleans    | 56                                            | 558                   | 10.0%                                          |
| Rutland    | 39                                            | 614                   | 6.4%                                           |
| Washington | 52                                            | 553                   | 9.4%                                           |
| Windham    | 36                                            | 414                   | 8.7%                                           |
| Windsor    | 63                                            | 677                   | 9.3%                                           |

Total number of Vermont farms with an agroforestry practice: 492 Total number of Vermont farms: 6,808

Percentage of Vermont farms with an agroforestry practice: 7.2%

Data Source: USDA NASS Census of Agriculture 2017

Maps and table created by USDA National Agroforestry Center

# Agroforestry in Virginia based on the 2017 Census of Agriculture

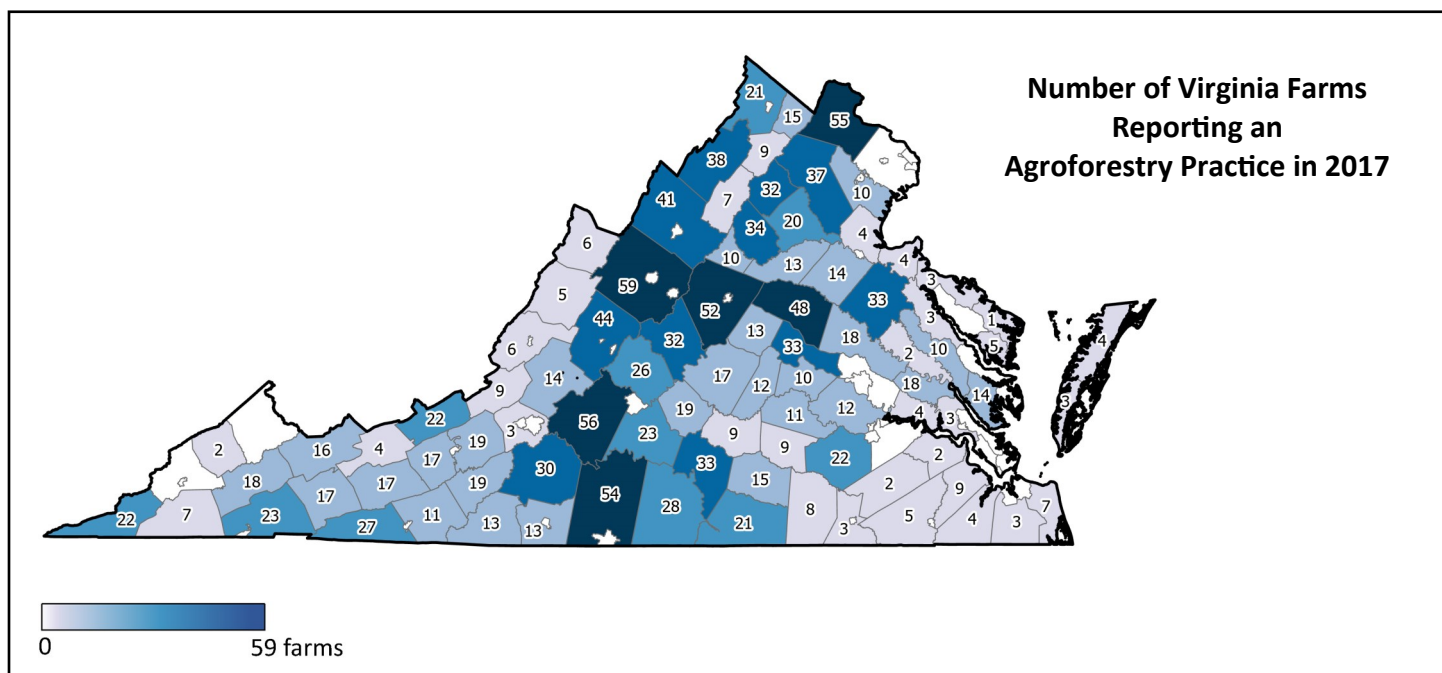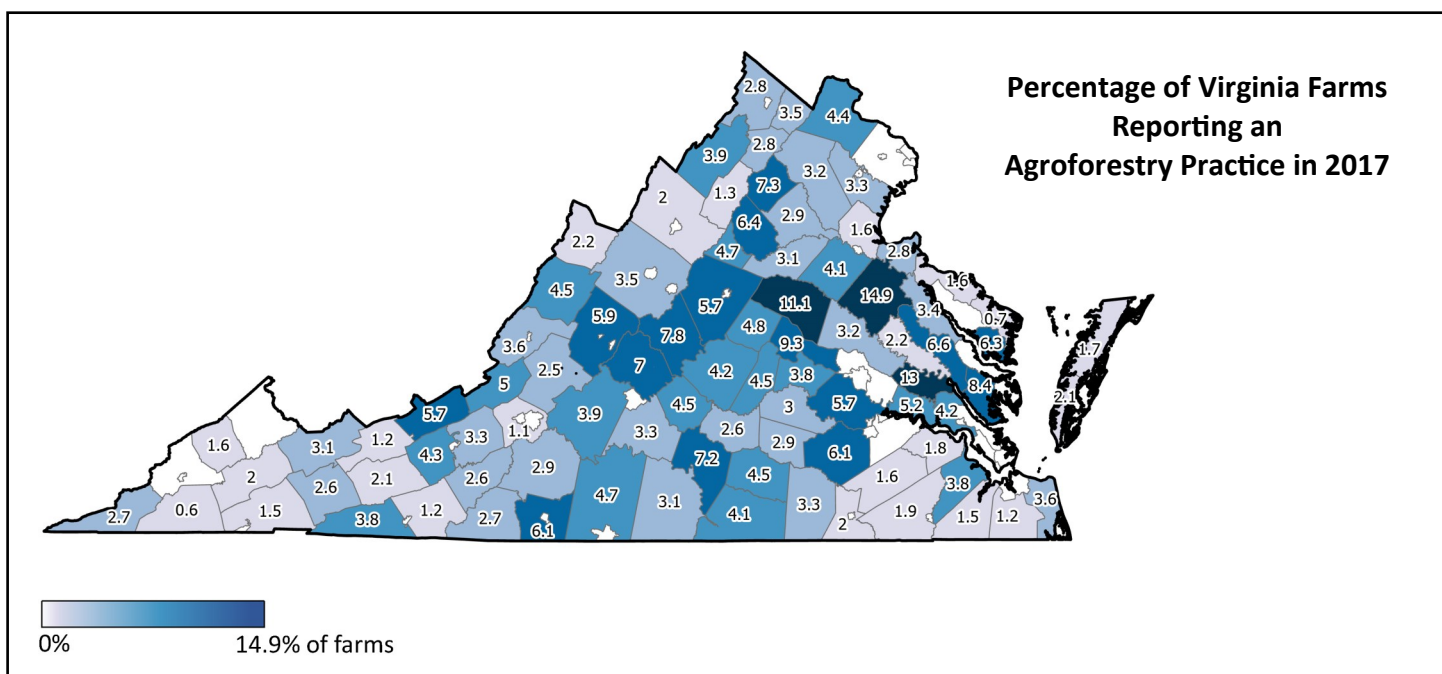

| County*    | Number of Farms with an Agroforestry Practice | Total Number of Farms | Percent of Farms with an Agroforestry Practice |
|------------|-----------------------------------------------|-----------------------|------------------------------------------------|
| Accomack   | 4                                             | 239                   | 1.7%                                           |
| Albemarle  | 52                                            | 913                   | 5.7%                                           |
| Alleghany  | 6                                             | 165                   | 3.6%                                           |
| Amelia     | 11                                            | 370                   | 3.0%                                           |
| Amherst    | 26                                            | 369                   | 7.0%                                           |
| Appomattox | 19                                            | 412                   | 4.6%                                           |
| Augusta    | 59                                            | 1,665                 | 3.5%                                           |

| County*    | Number of Farms with an Agroforestry Practice | Total Number of Farms | Percent of Farms with an Agroforestry Practice |
|------------|-----------------------------------------------|-----------------------|------------------------------------------------|
| Bath       | 5                                             | 110                   | 4.5%                                           |
| Bedford    | 56                                            | 1,418                 | 3.9%                                           |
| Bland      | 4                                             | 339                   | 1.2%                                           |
| Botetourt  | 14                                            | 551                   | 2.5%                                           |
| Brunswick  | 8                                             | 242                   | 3.3%                                           |
| Buckingham | 17                                            | 408                   | 4.2%                                           |
| Campbell   | 23                                            | 702                   | 3.3%                                           |

# Agroforestry in Virginia based on the 2017 Census of Agriculture

| County*         | Number of Farms with an Agroforestry Practice | Total Number of Farms | Percent of Farms with an Agroforestry Practice |
|-----------------|-----------------------------------------------|-----------------------|------------------------------------------------|
| Caroline        | 33                                            | 222                   | 14.9%                                          |
| Carroll         | 11                                            | 900                   | 1.2%                                           |
| Charles City    | 4                                             | 77                    | 5.2%                                           |
| Charlotte       | 33                                            | 460                   | 7.2%                                           |
| Chesapeake city | 3                                             | 248                   | 1.2%                                           |
| Chesterfield    | 12                                            | 210                   | 5.7%                                           |
| Clarke          | 15                                            | 427                   | 3.5%                                           |
| Craig           | 9                                             | 179                   | 5.0%                                           |
| Culpeper        | 20                                            | 682                   | 2.9%                                           |
| Cumberland      | 12                                            | 264                   | 4.5%                                           |
| Dickenson       | 2                                             | 128                   | 1.6%                                           |
| Dinwiddie       | 22                                            | 358                   | 6.1%                                           |
| Essex           | 3                                             | 88                    | 3.4%                                           |
| Fauquier        | 37                                            | 1,154                 | 3.2%                                           |
| Floyd           | 19                                            | 741                   | 2.6%                                           |
| Fluvanna        | 13                                            | 273                   | 4.8%                                           |
| Franklin        | 30                                            | 1,019                 | 2.9%                                           |
| Frederick       | 21                                            | 762                   | 2.8%                                           |
| Giles           | 22                                            | 389                   | 5.7%                                           |
| Gloucester      | 14                                            | 166                   | 8.4%                                           |
| Goochland       | 33                                            | 355                   | 9.3%                                           |
| Grayson         | 27                                            | 716                   | 3.8%                                           |
| Greene          | 10                                            | 214                   | 4.7%                                           |
| Greensville     | 3                                             | 150                   | 2.0%                                           |
| Halifax         | 28                                            | 895                   | 3.1%                                           |
| Hanover         | 18                                            | 567                   | 3.2%                                           |
| Henry           | 13                                            | 212                   | 6.1%                                           |
| Highland        | 6                                             | 275                   | 2.2%                                           |
| Isle of Wight   | 9                                             | 237                   | 3.8%                                           |
| James City      | 3                                             | 72                    | 4.2%                                           |
| King and Queen  | 10                                            | 151                   | 6.6%                                           |
| King George     | 4                                             | 141                   | 2.8%                                           |
| King William    | 2                                             | 90                    | 2.2%                                           |
| Lancaster       | 5                                             | 80                    | 6.3%                                           |
| Lee             | 22                                            | 830                   | 2.7%                                           |
| Loudoun         | 55                                            | 1,259                 | 4.4%                                           |
| Louisa          | 48                                            | 431                   | 11.1%                                          |

| County*             | Number of Farms with an Agroforestry Practice | Total Number of Farms | Percent of Farms with an Agroforestry Practice |
|---------------------|-----------------------------------------------|-----------------------|------------------------------------------------|
| Lunenburg           | 15                                            | 335                   | 4.5%                                           |
| Madison             | 34                                            | 533                   | 6.4%                                           |
| Mecklenburg         | 21                                            | 512                   | 4.1%                                           |
| Montgomery          | 19                                            | 584                   | 3.3%                                           |
| Nelson              | 32                                            | 409                   | 7.8%                                           |
| New Kent            | 18                                            | 138                   | 13.0%                                          |
| Northampton         | 3                                             | 142                   | 2.1%                                           |
| Northumberland      | 1                                             | 134                   | 0.7%                                           |
| Nottoway            | 9                                             | 311                   | 2.9%                                           |
| Orange              | 13                                            | 417                   | 3.1%                                           |
| Page                | 7                                             | 519                   | 1.3%                                           |
| Patrick             | 13                                            | 483                   | 2.7%                                           |
| Pittsylvania        | 54                                            | 1,157                 | 4.7%                                           |
| Powhatan            | 10                                            | 263                   | 3.8%                                           |
| Prince Edward       | 9                                             | 341                   | 2.6%                                           |
| Prince William      | 10                                            | 304                   | 3.3%                                           |
| Pulaski             | 17                                            | 394                   | 4.3%                                           |
| Rappahannock        | 32                                            | 439                   | 7.3%                                           |
| Roanoke             | 3                                             | 262                   | 1.1%                                           |
| Rockbridge          | 44                                            | 752                   | 5.9%                                           |
| Rockingham          | 41                                            | 2,026                 | 2.0%                                           |
| Russell             | 18                                            | 918                   | 2.0%                                           |
| Scott               | 7                                             | 1,138                 | 0.6%                                           |
| Shenandoah          | 38                                            | 965                   | 3.9%                                           |
| Smyth               | 17                                            | 663                   | 2.6%                                           |
| Southampton         | 5                                             | 257                   | 1.9%                                           |
| Spotsylvania        | 14                                            | 338                   | 4.1%                                           |
| Stafford            | 4                                             | 243                   | 1.6%                                           |
| Suffolk city        | 4                                             | 270                   | 1.5%                                           |
| Surry               | 2                                             | 111                   | 1.8%                                           |
| Sussex              | 2                                             | 124                   | 1.6%                                           |
| Tazewell            | 16                                            | 512                   | 3.1%                                           |
| Virginia Beach city | 7                                             | 196                   | 3.6%                                           |
| Warren              | 9                                             | 321                   | 2.8%                                           |
| Washington          | 23                                            | 1,506                 | 1.5%                                           |
| Westmoreland        | 3                                             | 183                   | 1.6%                                           |
| Wythe               | 17                                            | 819                   | 2.1%                                           |

\*Counties not listed in the table have no farms reporting an agroforestry practice in 2017.

**Total number of Virginia farms with an agroforestry practice: 1,526    Total number of Virginia farms: 43,225**

**Percentage of Virginia farms with an agroforestry practice: 3.5%**

**Data Source: USDA NASS Census of Agriculture 2017**

**Maps and table created by USDA National Agroforestry Center**

# Agroforestry in Washington based on the 2017 Census of Agriculture

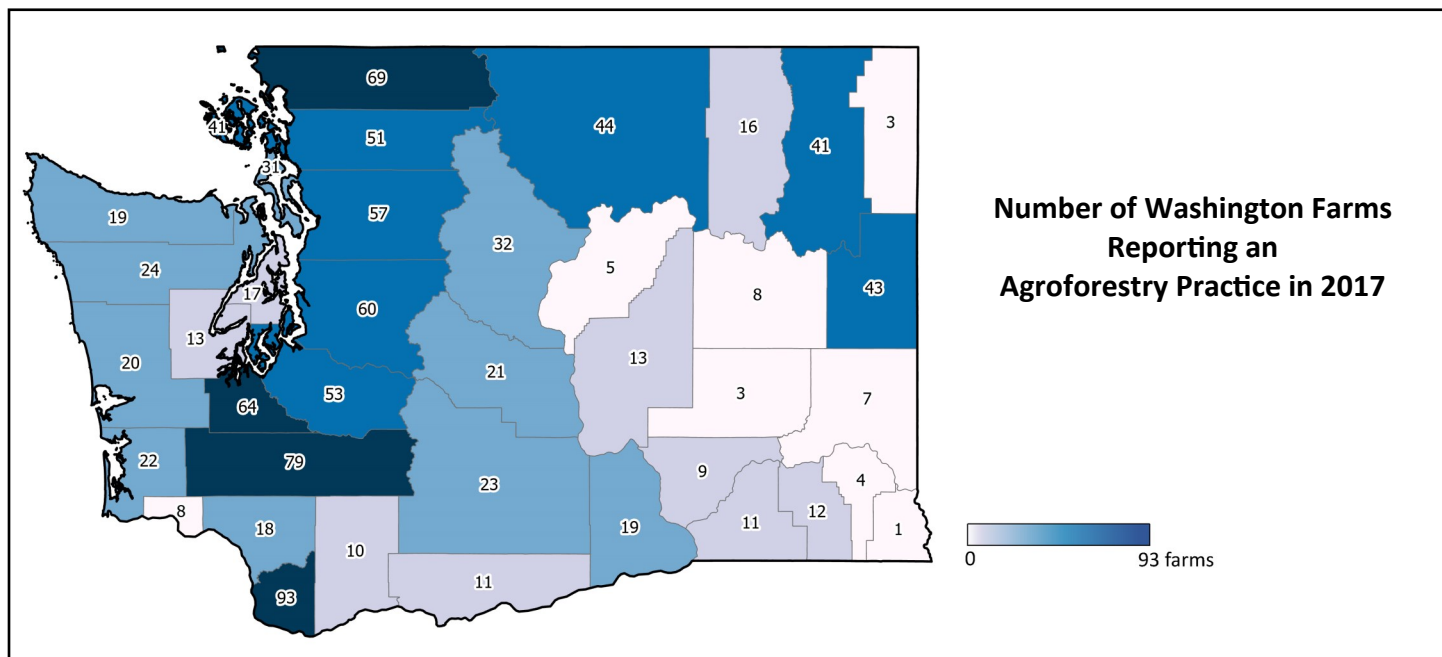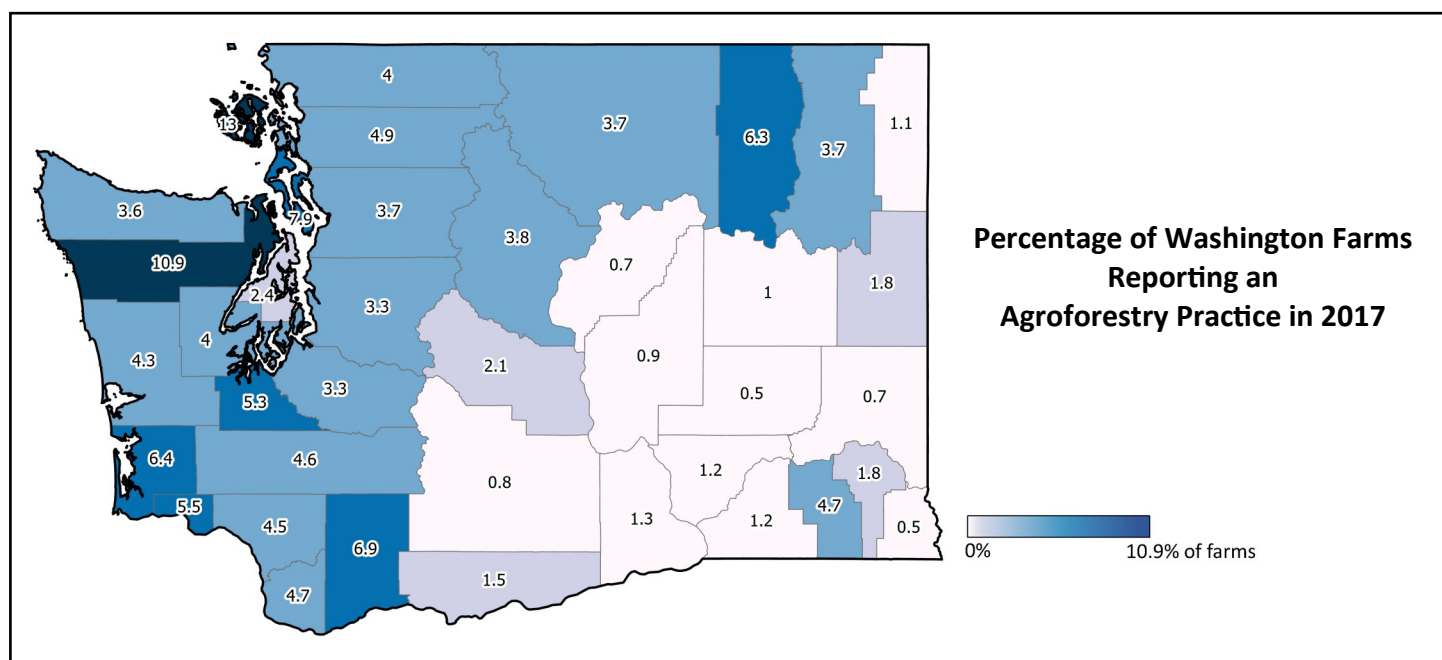

| County   | Number of Farms with an Agroforestry Practice | Total Number of Farms | Percent of Farms with an Agroforestry Practice |
|----------|-----------------------------------------------|-----------------------|------------------------------------------------|
| Adams    | 3                                             | 586                   | 0.5%                                           |
| Asotin   | 1                                             | 205                   | 0.5%                                           |
| Benton   | 19                                            | 1,520                 | 1.3%                                           |
| Chelan   | 32                                            | 835                   | 3.8%                                           |
| Clallam  | 19                                            | 528                   | 3.6%                                           |
| Clark    | 93                                            | 1,978                 | 4.7%                                           |
| Columbia | 12                                            | 257                   | 4.7%                                           |

| County       | Number of Farms with an Agroforestry Practice | Total Number of Farms | Percent of Farms with an Agroforestry Practice |
|--------------|-----------------------------------------------|-----------------------|------------------------------------------------|
| Cowlitz      | 18                                            | 403                   | 4.5%                                           |
| Douglas      | 5                                             | 729                   | 0.7%                                           |
| Ferry        | 16                                            | 252                   | 6.3%                                           |
| Franklin     | 9                                             | 772                   | 1.2%                                           |
| Garfield     | 4                                             | 226                   | 1.8%                                           |
| Grant        | 13                                            | 1,384                 | 0.9%                                           |
| Grays Harbor | 20                                            | 469                   | 4.3%                                           |

## Agroforestry in Washington based on the 2017 Census of Agriculture

| County       | Number of Farms with an Agroforestry Practice | Total Number of Farms | Percent of Farms with an Agroforestry Practice |
|--------------|-----------------------------------------------|-----------------------|------------------------------------------------|
| Island       | 31                                            | 390                   | 7.9%                                           |
| Jefferson    | 24                                            | 221                   | 10.9%                                          |
| King         | 60                                            | 1,796                 | 3.3%                                           |
| Kitsap       | 17                                            | 698                   | 2.4%                                           |
| Kittitas     | 21                                            | 1,008                 | 2.1%                                           |
| Klickitat    | 11                                            | 750                   | 1.5%                                           |
| Lewis        | 79                                            | 1,723                 | 4.6%                                           |
| Lincoln      | 8                                             | 783                   | 1.0%                                           |
| Mason        | 13                                            | 324                   | 4.0%                                           |
| Okanogan     | 44                                            | 1,192                 | 3.7%                                           |
| Pacific      | 22                                            | 346                   | 6.4%                                           |
| Pend Oreille | 3                                             | 261                   | 1.1%                                           |
| Pierce       | 53                                            | 1,607                 | 3.3%                                           |

| County      | Number of Farms with an Agroforestry Practice | Total Number of Farms | Percent of Farms with an Agroforestry Practice |
|-------------|-----------------------------------------------|-----------------------|------------------------------------------------|
| San Juan    | 41                                            | 316                   | 13.0%                                          |
| Skagit      | 51                                            | 1,041                 | 4.9%                                           |
| Skamania    | 10                                            | 145                   | 6.9%                                           |
| Snohomish   | 57                                            | 1,558                 | 3.7%                                           |
| Spokane     | 43                                            | 2,425                 | 1.8%                                           |
| Stevens     | 41                                            | 1,114                 | 3.7%                                           |
| Thurston    | 64                                            | 1,200                 | 5.3%                                           |
| Wahkiakum   | 8                                             | 145                   | 5.5%                                           |
| Walla Walla | 11                                            | 903                   | 1.2%                                           |
| Whatcom     | 69                                            | 1,712                 | 4.0%                                           |
| Whitman     | 7                                             | 1,039                 | 0.7%                                           |
| Yakima      | 23                                            | 2,952                 | 0.8%                                           |

Total number of Washington farms with an agroforestry practice: 1,075 Total number of Washington farms: 35,793

Percentage of Washington farms with an agroforestry practice: 3.0%

Data Source: USDA NASS Census of Agriculture 2017

Maps and table created by USDA National Agroforestry Center

# Agroforestry in West Virginia based on the 2017 Census of Agriculture

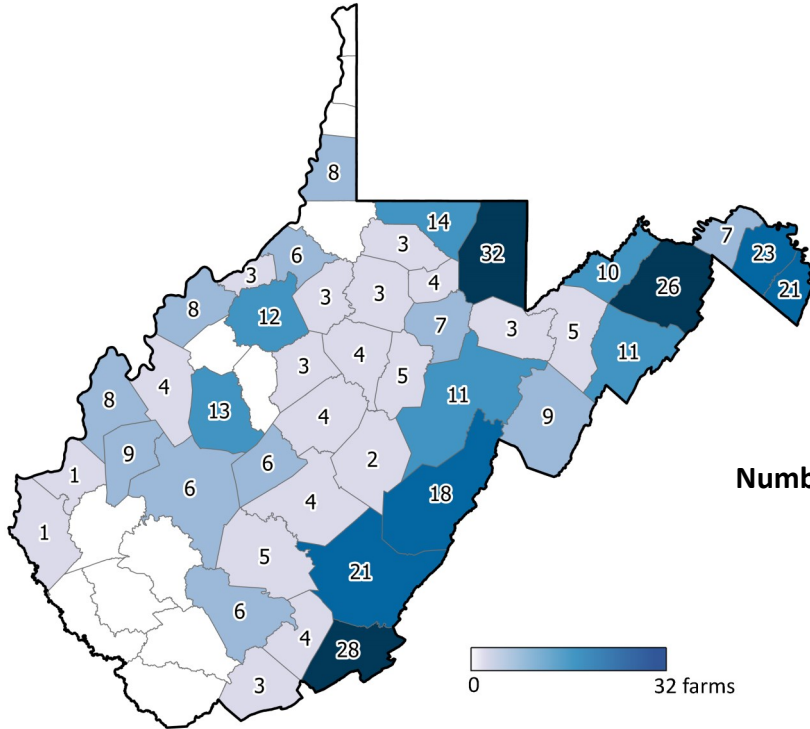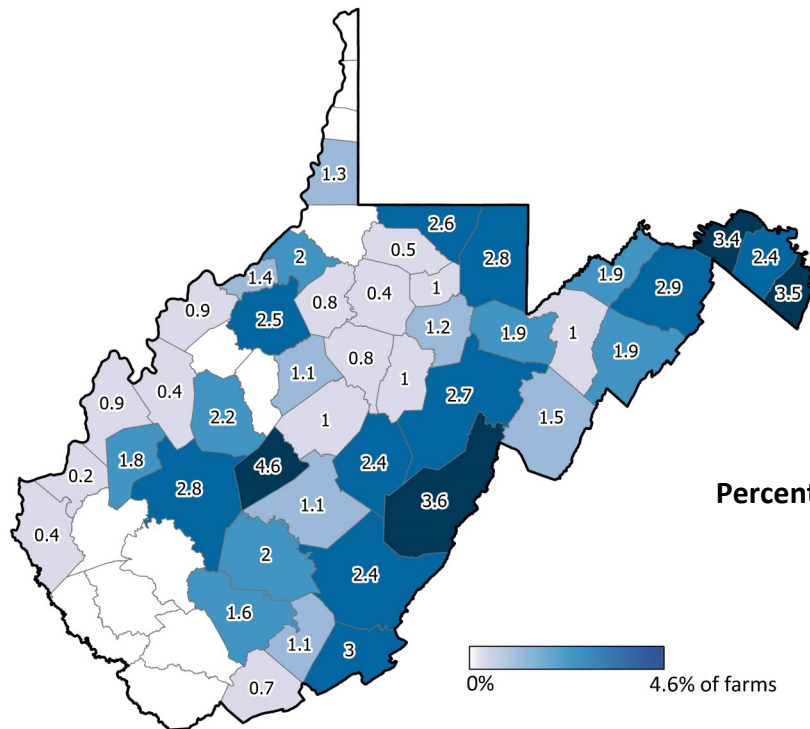

| County*  | Number of Farms with an Agroforestry Practice | Total Number of Farms | Percent of Farms with an Agroforestry Practice |
|----------|-----------------------------------------------|-----------------------|------------------------------------------------|
| Barbour  | 7                                             | 594                   | 1.2%                                           |
| Berkeley | 23                                            | 946                   | 2.4%                                           |

| County* | Number of Farms with an Agroforestry Practice | Total Number of Farms | Percent of Farms with an Agroforestry Practice |
|---------|-----------------------------------------------|-----------------------|------------------------------------------------|
| Braxton | 4                                             | 381                   | 1.0%                                           |
| Cabell  | 1                                             | 407                   | 0.2%                                           |

## Agroforestry in West Virginia based on the 2017 Census of Agriculture

| County*    | Number of Farms with an Agroforestry Practice | Total Number of Farms | Percent of Farms with an Agroforestry Practice |
|------------|-----------------------------------------------|-----------------------|------------------------------------------------|
| Clay       | 6                                             | 131                   | 4.6%                                           |
| Doddridge  | 3                                             | 392                   | 0.8%                                           |
| Fayette    | 5                                             | 253                   | 2.0%                                           |
| Gilmer     | 3                                             | 264                   | 1.1%                                           |
| Grant      | 5                                             | 522                   | 1.0%                                           |
| Greenbrier | 21                                            | 891                   | 2.4%                                           |
| Hampshire  | 26                                            | 883                   | 2.9%                                           |
| Hardy      | 11                                            | 580                   | 1.9%                                           |
| Harrison   | 3                                             | 810                   | 0.4%                                           |
| Jackson    | 4                                             | 982                   | 0.4%                                           |
| Jefferson  | 21                                            | 607                   | 3.5%                                           |
| Kanawha    | 6                                             | 214                   | 2.8%                                           |
| Lewis      | 4                                             | 481                   | 0.8%                                           |
| Marion     | 3                                             | 599                   | 0.5%                                           |
| Marshall   | 8                                             | 638                   | 1.3%                                           |
| Mason      | 8                                             | 876                   | 0.9%                                           |
| Mercer     | 3                                             | 410                   | 0.7%                                           |
| Mineral    | 10                                            | 519                   | 1.9%                                           |
| Monongalia | 14                                            | 542                   | 2.6%                                           |
| Monroe     | 28                                            | 929                   | 3.0%                                           |
| Monongalia | 14                                            | 542                   | 2.6%                                           |

| County*    | Number of Farms with an Agroforestry Practice | Total Number of Farms | Percent of Farms with an Agroforestry Practice |
|------------|-----------------------------------------------|-----------------------|------------------------------------------------|
| Monroe     | 28                                            | 929                   | 3.0%                                           |
| Morgan     | 7                                             | 207                   | 3.4%                                           |
| Nicholas   | 4                                             | 372                   | 1.1%                                           |
| Pendleton  | 9                                             | 584                   | 1.5%                                           |
| Pleasants  | 3                                             | 208                   | 1.4%                                           |
| Pocahontas | 18                                            | 500                   | 3.6%                                           |
| Preston    | 32                                            | 1,142                 | 2.8%                                           |
| Putnam     | 9                                             | 514                   | 1.8%                                           |
| Raleigh    | 6                                             | 365                   | 1.6%                                           |
| Randolph   | 11                                            | 402                   | 2.7%                                           |
| Ritchie    | 12                                            | 473                   | 2.5%                                           |
| Roane      | 13                                            | 604                   | 2.2%                                           |
| Summers    | 4                                             | 357                   | 1.1%                                           |
| Taylor     | 4                                             | 413                   | 1.0%                                           |
| Tucker     | 3                                             | 159                   | 1.9%                                           |
| Tyler      | 6                                             | 305                   | 2.0%                                           |
| Upshur     | 5                                             | 499                   | 1.0%                                           |
| Wayne      | 1                                             | 237                   | 0.4%                                           |
| Webster    | 2                                             | 83                    | 2.4%                                           |
| Wood       | 8                                             | 881                   | 0.9%                                           |

\*Counties not listed in the table have no farms reporting an agroforestry practice in 2017.

**Total number of West Virginia farms with an agroforestry practice: 384    Total number of West Virginia farms: 23,622**

**Percentage of West Virginia farms with an agroforestry practice: 1.6%**

**Data Source: USDA NASS Census of Agriculture 2017**

**Maps and table created by USDA National Agroforestry Center**

# Agroforestry in Wisconsin based on the 2017 Census of Agriculture

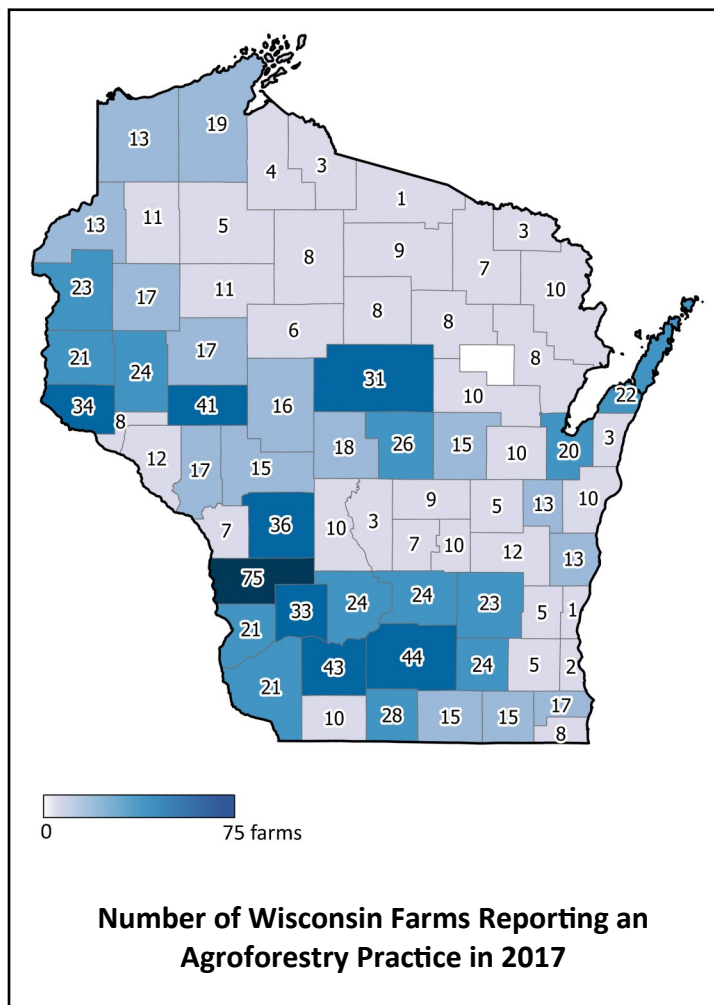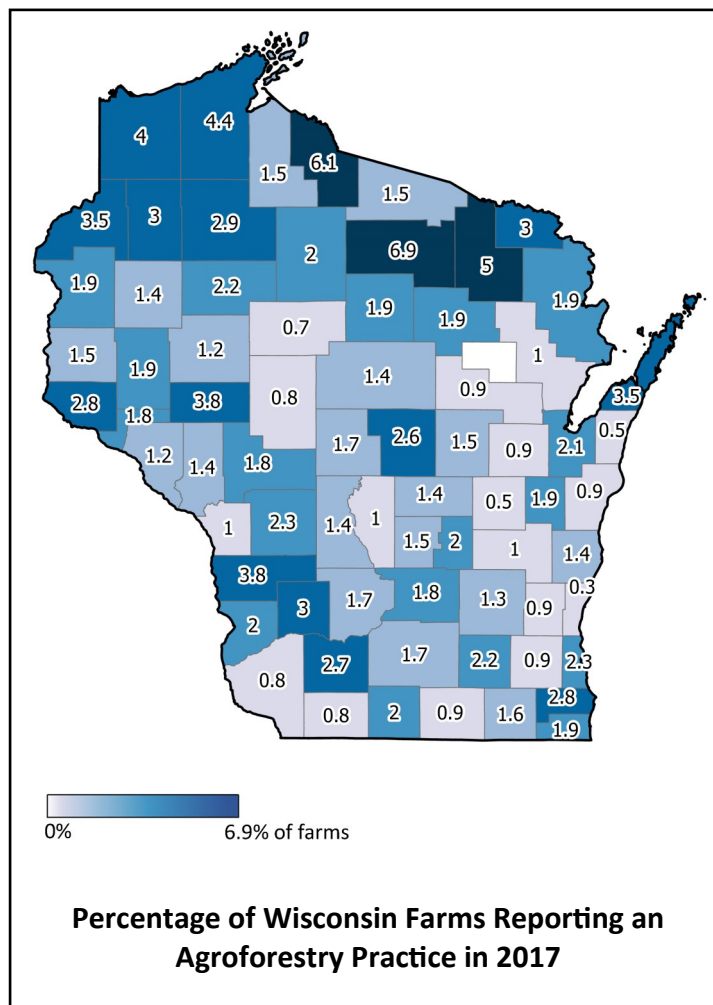

| County*  | Number of Farms with an Agroforestry Practice | Total Number of Farms | Percent of Farms with an Agroforestry Practice |
|----------|-----------------------------------------------|-----------------------|------------------------------------------------|
| Adams    | 3                                             | 308                   | 1.0%                                           |
| Ashland  | 4                                             | 263                   | 1.5%                                           |
| Barron   | 17                                            | 1,200                 | 1.4%                                           |
| Bayfield | 19                                            | 427                   | 4.4%                                           |
| Brown    | 20                                            | 975                   | 2.1%                                           |
| Buffalo  | 12                                            | 966                   | 1.2%                                           |
| Burnett  | 13                                            | 369                   | 3.5%                                           |
| Calumet  | 13                                            | 684                   | 1.9%                                           |
| Chippewa | 17                                            | 1,409                 | 1.2%                                           |
| Clark    | 16                                            | 2,095                 | 0.8%                                           |
| Columbia | 24                                            | 1,357                 | 1.8%                                           |
| Crawford | 21                                            | 1,034                 | 2.0%                                           |
| Dane     | 44                                            | 2,566                 | 1.7%                                           |
| Dodge    | 23                                            | 1,749                 | 1.3%                                           |
| Door     | 22                                            | 626                   | 3.5%                                           |
| Douglas  | 13                                            | 329                   | 4.0%                                           |

| County*     | Number of Farms with an Agroforestry Practice | Total Number of Farms | Percent of Farms with an Agroforestry Practice |
|-------------|-----------------------------------------------|-----------------------|------------------------------------------------|
| Dunn        | 24                                            | 1,288                 | 1.9%                                           |
| Eau Claire  | 41                                            | 1,069                 | 3.8%                                           |
| Florence    | 3                                             | 101                   | 3.0%                                           |
| Fond du Lac | 12                                            | 1,244                 | 1.0%                                           |
| Forest      | 7                                             | 140                   | 5.0%                                           |
| Grant       | 21                                            | 2,482                 | 0.8%                                           |
| Green       | 28                                            | 1,428                 | 2.0%                                           |
| Green Lake  | 10                                            | 502                   | 2.0%                                           |
| Iowa        | 43                                            | 1,576                 | 2.7%                                           |
| Iron        | 3                                             | 49                    | 6.1%                                           |
| Jackson     | 15                                            | 855                   | 1.8%                                           |
| Jefferson   | 24                                            | 1,098                 | 2.2%                                           |
| Juneau      | 10                                            | 715                   | 1.4%                                           |
| Kenosha     | 8                                             | 415                   | 1.9%                                           |
| Kewaunee    | 3                                             | 655                   | 0.5%                                           |
| La Crosse   | 7                                             | 667                   | 1.0%                                           |

## Agroforestry in Wisconsin based on the 2017 Census of Agriculture

| County*   | Number of Farms with an Agroforestry Practice | Total Number of Farms | Percent of Farms with an Agroforestry Practice |
|-----------|-----------------------------------------------|-----------------------|------------------------------------------------|
| Lafayette | 10                                            | 1,327                 | 0.8%                                           |
| Langlade  | 8                                             | 432                   | 1.9%                                           |
| Lincoln   | 8                                             | 426                   | 1.9%                                           |
| Manitowoc | 10                                            | 1,171                 | 0.9%                                           |
| Marathon  | 31                                            | 2,237                 | 1.4%                                           |
| Marinette | 10                                            | 515                   | 1.9%                                           |
| Marquette | 7                                             | 458                   | 1.5%                                           |
| Milwaukee | 2                                             | 86                    | 2.3%                                           |
| Monroe    | 36                                            | 1,555                 | 2.3%                                           |
| Oconto    | 8                                             | 834                   | 1.0%                                           |
| Oneida    | 9                                             | 131                   | 6.9%                                           |
| Outagamie | 10                                            | 1,130                 | 0.9%                                           |
| Ozaukee   | 1                                             | 316                   | 0.3%                                           |
| Pepin     | 8                                             | 448                   | 1.8%                                           |
| Pierce    | 34                                            | 1,229                 | 2.8%                                           |
| Polk      | 23                                            | 1,234                 | 1.9%                                           |
| Portage   | 26                                            | 982                   | 2.6%                                           |
| Price     | 8                                             | 410                   | 2.0%                                           |
| Racine    | 17                                            | 611                   | 2.8%                                           |
| Richland  | 33                                            | 1,103                 | 3.0%                                           |

| County*     | Number of Farms with an Agroforestry Practice | Total Number of Farms | Percent of Farms with an Agroforestry Practice |
|-------------|-----------------------------------------------|-----------------------|------------------------------------------------|
| Rock        | 15                                            | 1,587                 | 0.9%                                           |
| Rusk        | 11                                            | 501                   | 2.2%                                           |
| Sauk        | 24                                            | 1,412                 | 1.7%                                           |
| Sawyer      | 5                                             | 175                   | 2.9%                                           |
| Shawano     | 10                                            | 1,139                 | 0.9%                                           |
| Sheboygan   | 13                                            | 958                   | 1.4%                                           |
| St. Croix   | 21                                            | 1,444                 | 1.5%                                           |
| Taylor      | 6                                             | 893                   | 0.7%                                           |
| Trempealeau | 17                                            | 1,229                 | 1.4%                                           |
| Vernon      | 75                                            | 1,961                 | 3.8%                                           |
| Vilas       | 1                                             | 67                    | 1.5%                                           |
| Walworth    | 15                                            | 941                   | 1.6%                                           |
| Washburn    | 11                                            | 372                   | 3.0%                                           |
| Washington  | 5                                             | 578                   | 0.9%                                           |
| Waukesha    | 5                                             | 574                   | 0.9%                                           |
| Waupaca     | 15                                            | 1,031                 | 1.5%                                           |
| Waushara    | 9                                             | 633                   | 1.4%                                           |
| Winnebago   | 5                                             | 957                   | 0.5%                                           |
| Wood        | 18                                            | 1,062                 | 1.7%                                           |

\*Counties not listed in the table have no farms reporting an agroforestry practice in 2017.

Total number of Wisconsin farms with an agroforestry practice: 1,120 Total number of Wisconsin farms: 64,793

Percentage of Wisconsin farms with an agroforestry practice: 1.7%

Data Source: USDA NASS Census of Agriculture 2017

Maps and table created by USDA National Agroforestry Center

# Agroforestry in Wyoming based on the 2017 Census of Agriculture

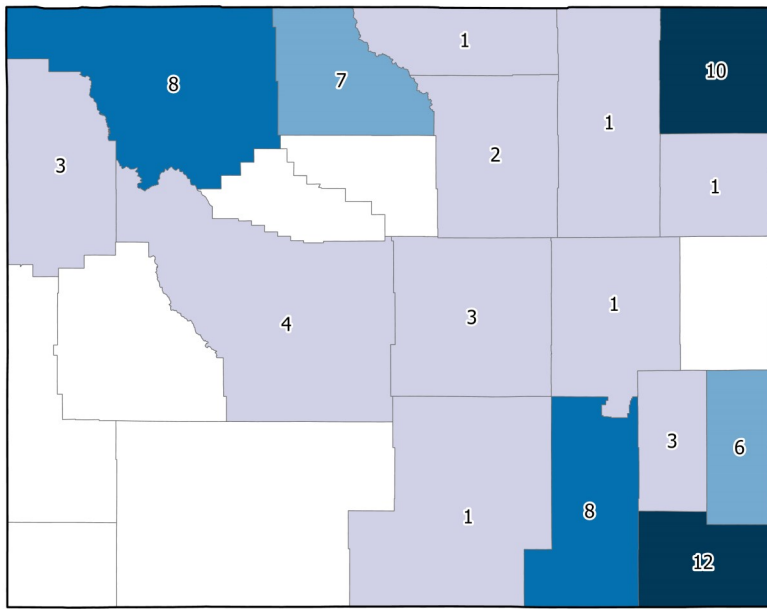

Number of Wyoming Farms Reporting an Agroforestry Practice in 2017

0 12 farms

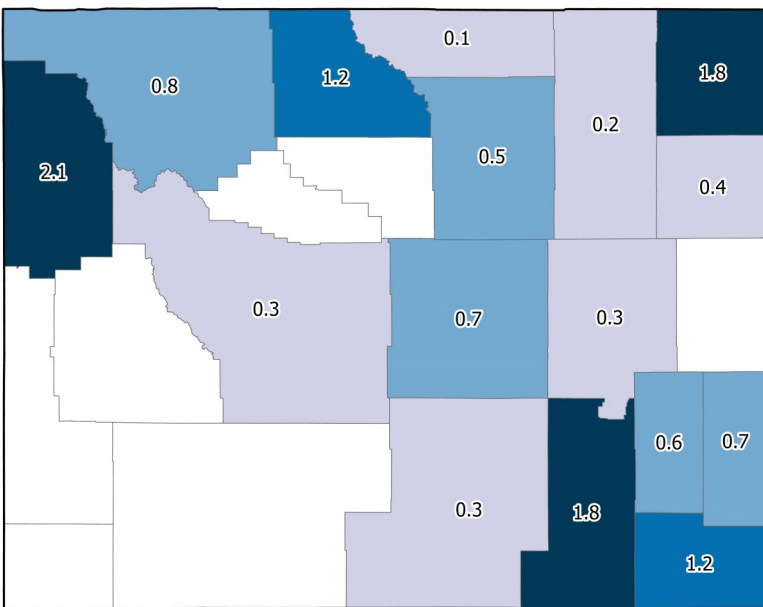

Percentage of Wyoming Farms Reporting an Agroforestry Practice in 2017

0% 2.1% of farms

| County*  | Number of Farms with an Agroforestry Practice | Total Number of Farms | Percent of Farms with an Agroforestry Practice |
|----------|-----------------------------------------------|-----------------------|------------------------------------------------|
| Albany   | 8                                             | 451                   | 1.8%                                           |
| Big Horn | 7                                             | 586                   | 1.2%                                           |
| Campbell | 1                                             | 643                   | 0.2%                                           |
| Carbon   | 1                                             | 345                   | 0.3%                                           |
| Converse | 1                                             | 384                   | 0.3%                                           |
| Crook    | 10                                            | 554                   | 1.8%                                           |

| County* | Number of Farms with an Agroforestry Practice | Total Number of Farms | Percent of Farms with an Agroforestry Practice |
|---------|-----------------------------------------------|-----------------------|------------------------------------------------|
| Fremont | 4                                             | 1,152                 | 0.3%                                           |
| Goshen  | 6                                             | 842                   | 0.7%                                           |
| Johnson | 2                                             | 384                   | 0.5%                                           |
| Laramie | 12                                            | 999                   | 1.2%                                           |
| Natrona | 3                                             | 430                   | 0.7%                                           |
| Park    | 8                                             | 1,008                 | 0.8%                                           |

## Agroforestry in Wyoming based on the 2017 Census of Agriculture

| County*  | Number of<br>Farms with an<br>Agroforestry<br>Practice | Total<br>Number<br>of Farms | Percent of<br>Farms with an<br>Agroforestry<br>Practice |
|----------|--------------------------------------------------------|-----------------------------|---------------------------------------------------------|
| Platte   | 3                                                      | 505                         | 0.6%                                                    |
| Sheridan | 1                                                      | 833                         | 0.1%                                                    |

| County* | Number of<br>Farms with an<br>Agroforestry<br>Practice | Total<br>Number<br>of Farms | Percent of<br>Farms with an<br>Agroforestry<br>Practice |
|---------|--------------------------------------------------------|-----------------------------|---------------------------------------------------------|
| Teton   | 3                                                      | 142                         | 2.1%                                                    |
| Weston  | 1                                                      | 247                         | 0.4%                                                    |

\*Counties not listed in the table have no farms reporting an agroforestry practice in 2017.

Total number of Wyoming farms with an agroforestry practice: 71    Total number of Wyoming farms: 11,938

Percentage of Wyoming farms with an agroforestry practice: 0.6%

Data Source: USDA NASS Census of Agriculture 2017

Maps and table created by USDA National Agroforestry Center
